# Supplementary material
Source: Royal Society of Chemistry journal article supplement (doi:10.1039/d5gc06683b)
Supplement: d5gc06683b1.pdf [file d5gc06683b1.pdf]

## Solvent-Free/Scalable Mechanochemical-Assisted Addition of Phosphine Oxides to Aldehydes: Sustainable Protocol for One-Pot Tandem P-C Bond Formation

Marcos López-Aguilar,<sup>[a]</sup> Javier F. Reynes,<sup>[b]</sup> Luciana Cicco,<sup>[a,c]</sup> Alba Suárez-Fernández,<sup>[a]</sup> Vito Capriati,<sup>[c]</sup> Alejandro Presa Soto\*,<sup>[a]</sup> Felipe García\*,<sup>[b,d]</sup> and Joaquín García-Álvarez\*,<sup>[a]</sup>

---

<sup>[a]</sup> Laboratorio de Química Sintética Sostenible (*QuimSinSos*), Departamento de Química Orgánica e Inorgánica, Instituto de Química Organometálica Enrique Moles (*IUQOEM*), Centro de Innovación en Química Avanzada (*ORFEO-CINQA*), Facultad de Química, Universidad de Oviedo, E33071, Oviedo, Asturias, Spain.

<sup>[b]</sup> Departamento de Química Orgánica e Inorgánica, Facultad de Química, Universidad de Oviedo, E33071 Oviedo, Asturias, Spain.

<sup>[c]</sup> Dipartimento di Farmacia-Scienze del Farmaco, Università di Bari "Aldo Moro", Consorzio C.I.N.M.P.I.S., Via E. Orabona 4, I-70125 Bari, Italy.

<sup>[d]</sup> School of Chemistry, Monash University, Clayton, Victoria 3800, Australia.

---

### Electronic Supplementary Information (page SI\_1 of SI\_90)

#### Table of Contents

|                                                                                                                                                       |                     |             |
|-------------------------------------------------------------------------------------------------------------------------------------------------------|---------------------|-------------|
| <b>I.-</b>                                                                                                                                            | <b>General</b>      |             |
| <b>Information.....</b>                                                                                                                               |                     | <b>SI_3</b> |
| <b>II.- General procedures for the synthesis of <math>\alpha</math>-hydroxyphosphine chalcogenides</b>                                                | <b>3a-</b>          |             |
| <b>y.....</b>                                                                                                                                         |                     | <b>SI_4</b> |
| II.1.- Standard procedure for the synthesis of $\alpha$ -hydroxyphosphine chalcogenides <b>3a,e-h j,m ,q,t-y</b> obtained from solid aldehydes.....   |                     | <b>SI_4</b> |
| II.2.- Scaled-up procedure for the multigram synthesis of ((4-chlorophenyl)(hydroxy)methyl)diphenylphosphine oxide                                    |                     |             |
| <b>3a.....</b>                                                                                                                                        |                     | <b>SI_4</b> |
| II.3.- Standard procedure for the synthesis of $\alpha$ -hydroxyphosphine chalcogenides <b>3b-d,i,k-l,n-p,r-s</b> obtained from liquid aldehydes..... |                     | <b>SI_5</b> |
| <b>III.- Standard procedure for the mechanochemical oxidation of primary alcohols</b>                                                                 | <b>4a,c-d,f,i,l</b> | <b>into</b> |
| <b>aldehydes.....</b>                                                                                                                                 |                     | <b>SI_6</b> |
| <b>IV.- Standard procedure for the one-pot tandem synthesis of <math>\alpha</math>-hydroxyphosphine oxides from primary alcohols.....</b>             |                     | <b>SI_8</b> |
| <b>V.- Spectroscopic data of products</b>                                                                                                             | <b>3a-</b>          |             |
| <b>y.....</b>                                                                                                                                         |                     | <b>SI_9</b> |

|                                                             |              |
|-------------------------------------------------------------|--------------|
| <b>VI.- Green chemistry metrics (GCM) calculations.....</b> | <b>SI_18</b> |
| VI.1.- E-factor.....                                        | SI_18        |
| VI.2.- Energy usage.....                                    | SI_25        |
| VI.3.- Process mass intensity (PMI).....                    | SI_28        |
| VI.4.- Generalized reaction mass efficiency (RME).....      | SI_35        |
| VI.5.- Real atom economy (RAE).....                         | SI_42        |
| <b>VII.- Cost calculations.....</b>                         | <b>SI_49</b> |
| <b>VIII.- References.....</b>                               | <b>SI_52</b> |
| <b>IX.- Copy of NMR Spectra.....</b>                        | <b>SI_53</b> |

## I.- General information.

Commercially available reagents were used without further purification unless liquid aldehydes, which were distilled under reduced pressure. Secondary phosphine chalcogenides employed were carefully dried under vacuum before being used and stored under argon. Reactions were performed with Retsch MM400 or MM500 Vario ball mills using RETSCH ZrO<sub>2</sub> grinding jars and ZrO<sub>2</sub> ball bearings. <sup>1</sup>H and <sup>31</sup>P{<sup>1</sup>H}-NMR spectra (CDCl<sub>3</sub>, DMSO-*d*<sup>6</sup>) were obtained using a Bruker NAV-300 (<sup>1</sup>H, 300 MHz; <sup>31</sup>P, 121 MHz) or a Bruker NAV-400 (<sup>1</sup>H, 401 MHz; <sup>31</sup>P, 162 MHz). <sup>13</sup>C{<sup>1</sup>H} spectra were obtained using a Bruker NAV-300 (75 MHz). All chemical shifts (δ) are given in parts per million (ppm). Calibration was made on the signal of the solvent (CDCl<sub>3</sub> <sup>1</sup>H: 7.26, <sup>13</sup>C: 77.16, DMSO-*d*<sup>6</sup> <sup>1</sup>H: 2.50; <sup>13</sup>C: 39.52).<sup>[1]</sup> Coupling constants (*J*-values) are given in hertz (Hz). Chemical shifts are reported as follows: value (description of absorption, coupling constant(s) where applicable, number of protons). The <sup>1</sup>H-NMR spectra are presented over the 0-10 ppm region. In the <sup>13</sup>C-NMR spectra, the proximity of multiple aromatic signals and the presence of C–P couplings at different bond distances prevent unambiguous assignment in this region. Therefore, only the doublet signal of the CH(OH) group bound to phosphorus, characteristic of the C–P bond formed, and other signals derived from aliphatic carbons are reported in the product description. Full <sup>13</sup>C-NMR spectra are available in Section IX.

## II.- General procedures for the synthesis of $\alpha$ -hydroxyphosphine chalcogenides **3a-y**.

### II.1.- Standard procedure for the synthesis of $\alpha$ -hydroxyphosphine chalcogenides **3a,e-h,j,m,q,t-y** obtained from solid aldehydes.

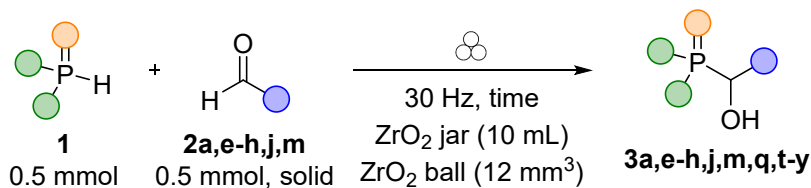

**Scheme SI\_1:** Synthesis of products **3a,e-h,j,m,q,t-y**.

The corresponding secondary phosphine chalcogenide **1** (0.5 mmol, 1 equiv.), solid aldehyde **2a,e-h,j,m** (0.5 mmol, 1 equiv.) and a  $\text{ZrO}_2$  bearing ball (12 mm<sup>3</sup>) were added to a  $\text{ZrO}_2$  grinding jar (10 mL) which was milled at 30 Hz until reaction was completed (monitored by <sup>1</sup>H-NMR and <sup>31</sup>P-NMR). Upon completion, the resulting  $\alpha$ -hydroxyphosphine chalcogenide **3a,e-h,j,m,q,t-y** was directly scraped from the jar.

### II.2.- Scaled-up procedure for the multigram synthesis of ((4-chlorophenyl)(hydroxy)methyl)diphenylphosphine oxide **3a**.

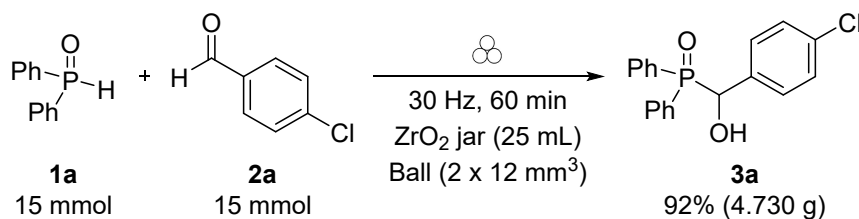

**Scheme SI\_2:** Multigram synthesis of product **3a**.

Diphenyl phosphine oxide **1a** (3.033 g, 15 mmol, 1 equiv.), 4-chlorobenzaldehyde **2a** (2.109 g, 15 mmol, 1 equiv.) and two  $\text{ZrO}_2$  bearing balls (12 mm<sup>3</sup>) were added to a  $\text{ZrO}_2$  grinding jar (25 mL) which was milled at 30 Hz for 60 min. Upon completion, the resulting ((4-chlorophenyl)(hydroxy)methyl)diphenylphosphine oxide **3a** (4.730 g, 92% yield) was directly scraped from the jar.

### II.3.- Standard procedure for the synthesis of $\alpha$ -hydroxyphosphine chalcogenides **3b-d,i,k-l,n-p,r-s** obtained from liquid aldehydes.

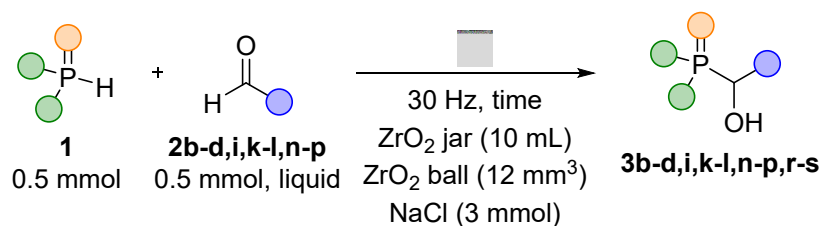

**Scheme SI\_3:** Synthesis of products **3b-d,i,k-l,n-p,r-s**.

The corresponding secondary phosphine chalcogenide **1** (0.5 mmol, 1 equiv.), liquid aldehyde **2b-d,i,k-l,n-p** (0.5 mmol, 1 equiv.), NaCl (174 mg, 3 mmol) and a  $\text{ZrO}_2$  bearing ball (12 mm<sup>3</sup>) were added to a  $\text{ZrO}_2$  grinding jar (10 mL) which was milled at 30 Hz until reaction was completed (<sup>1</sup>H-NMR and <sup>31</sup>P-NMR monitored). Upon completion, the resulting solid mixture was transferred to a vial (20 mL), the vial rinsed with distilled water, sonicated for 20 minutes, filtered and dried under vacuum affording  $\alpha$ -hydroxyphosphine chalcogenides **3b-d,i,k-l,n-p,r-s**.

### III.- Standard procedure for the mechanochemical oxidation of primary alcohols **4a,c-d,f,i,l** into aldehydes.

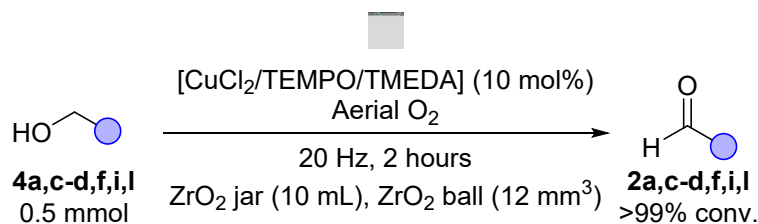

**Scheme SI\_4:** Mechanochemical oxidation of primary alcohols **4a,c-d,f,i,l**.

The corresponding primary alcohol **4a,c-d,f,i,l** (0.5 mmol, 1 equiv.),  $\text{CuCl}_2 \cdot 2\text{H}_2\text{O}$  (9 mg, 0.05 mmol, 0.1 equiv.), 2,2,6,6-tetramethylpiperidine 1-oxyl (TEMPO, 8 mg, 0.05 mmol, 0.1 equiv.), *N,N,N',N'*-tetramethylethylenediamine (TMEDA, 8  $\mu\text{L}$ , 0.05 mmol, 0.1 equiv.) and a  $\text{ZrO}_2$  bearing ball (12  $\text{mm}^3$ ) were added to a  $\text{ZrO}_2$  grinding jar (10 mL) which was milled at 20 Hz for one hour. Then, the jar was opened for 10 seconds to allow air renewal, closed again, and milled at 20 Hz for one more hour. After that, the blue slurry formed in the jar was dissolved in dichloromethane (20 mL), poured in a separation funnel and washed with a saturated solution of  $\text{NH}_4\text{Cl}$  (20 mL). The aqueous phase was washed with dichloromethane (20 mL), the organic layers combined, dried with  $\text{MgSO}_4$  and filtered. Finally, solvent was carefully removed under vacuum (750 to 400 mbar, 40  $^\circ\text{C}$ ) affording aldehydes **2a,c-d,f,i,l** in quantitative conversion (determined by  $^1\text{H-NMR}$  as transformation of reactant **4** in product **2**).

To assess possible mass losses, alcohols **4a** and **4i** were selected as representative substrates and subjected to an internal standard-based  $^1\text{H-NMR}$  analysis. After completing the procedure described above, the crude mixtures containing aldehydes **2a** and **2i** were dissolved in  $\text{CDCl}_3$  and  $\text{CHBr}_3$  (40  $\mu\text{L}$ , 0.457 mmol) was added as an internal standard.  $^1\text{H-NMR}$  spectra (**Figures SI\_1** and **SI\_2**) showed conversions of 81% (**2a**) and 83% (**2i**).

Moreover, the turnover number (TON) and turnover frequency (TOF) of the oxidative catalytic system were determined using product **2a** as a representative model substrate (81% conversion determined employing an internal standard).

$$\text{TON} = \text{mmol of product} / \text{mmol of catalyst} = 0.405 / 0.05 = 8.1.$$

$$\text{TOF} = \text{TON} / \text{reaction time} = 8.1 / 2 \text{ h} = 4.05 \text{ h}^{-1}.$$

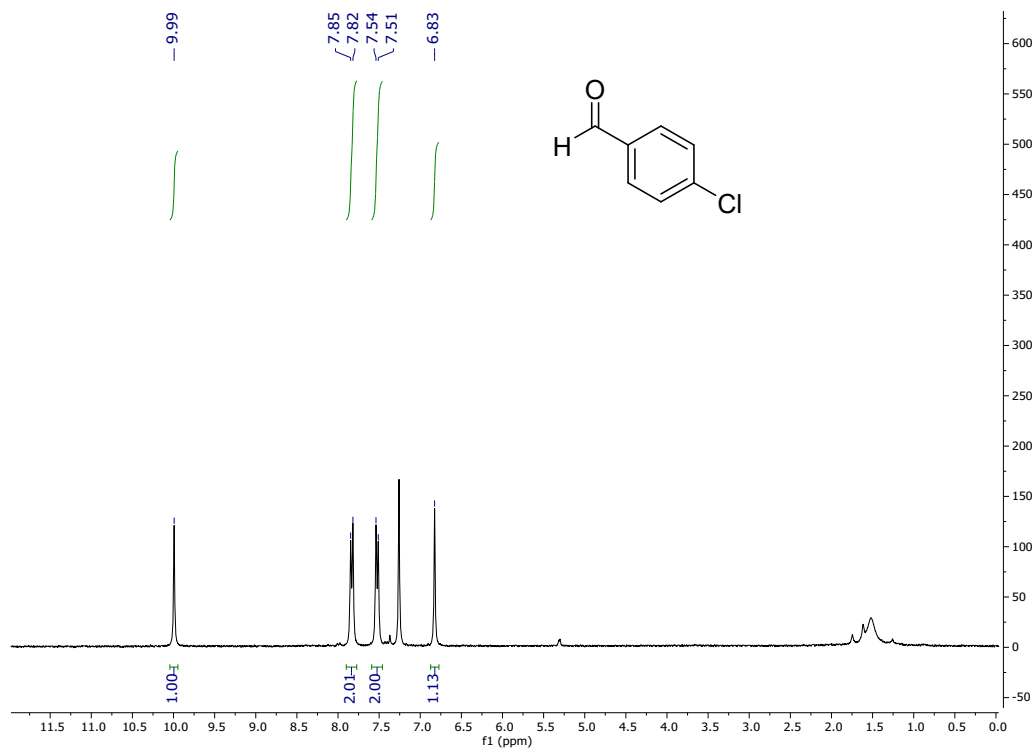

**Figure SI\_1:**  $^1\text{H-NMR}$  for **2a** in  $\text{CDCl}_3$  (300 MHz) using  $\text{CHBr}_3$  (40  $\mu\text{L}$ , 0.457 mmol) as internal standard.

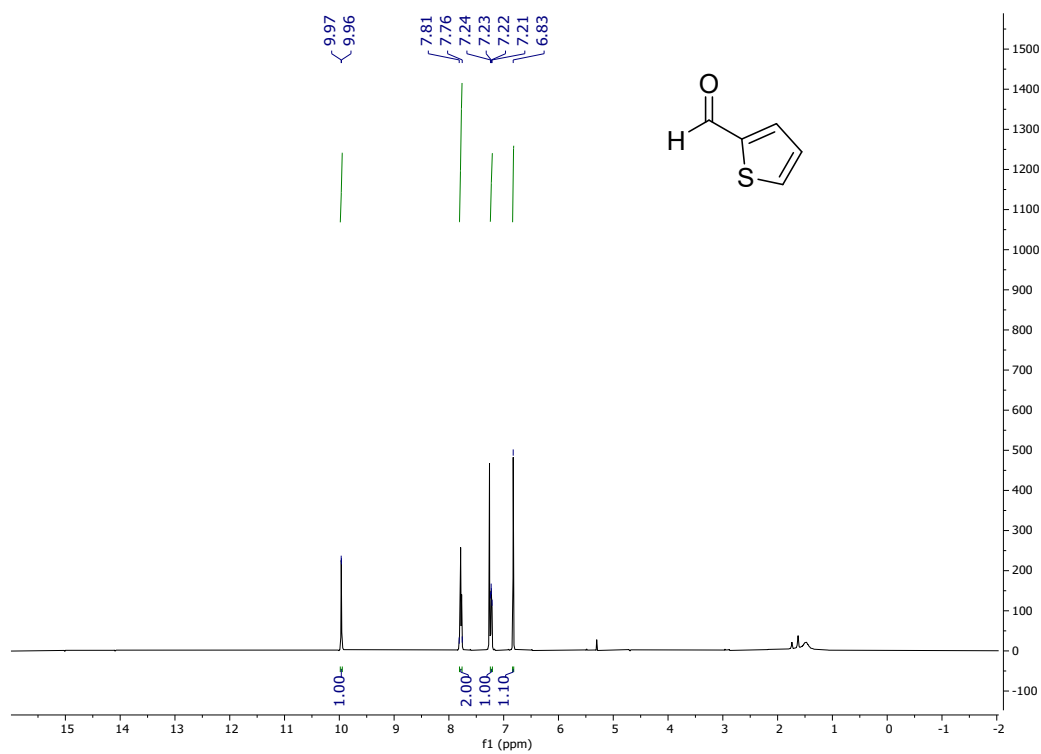

**Figure SI\_2:**  $^1\text{H-NMR}$  for **2i** in  $\text{CDCl}_3$  (300 MHz) using  $\text{CHBr}_3$  (40  $\mu\text{L}$ , 0.457 mmol) as internal standard.

#### IV.- Standard procedure for the one-pot tandem synthesis of $\alpha$ -hydroxyphosphine oxides from primary alcohols.

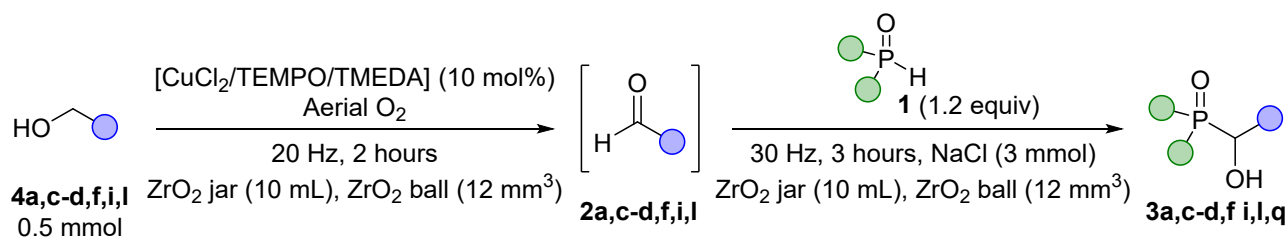

**Scheme SI\_5:** One-pot synthesis of products **3a,c-d,f,i,l,q**.

The corresponding primary alcohol **4a,c-d,f,i,l** (0.5 mmol, 1 equiv.),  $\text{CuCl}_2 \cdot 2\text{H}_2\text{O}$  (9 mg, 0.05 mmol, 0.1 equiv.), 2,2,6,6-tetramethylpiperidine 1-oxyl (TEMPO, 8 mg, 0.05 mmol, 0.1 equiv.), *N,N,N',N'*-tetramethylethylenediamine (TMEDA, 8  $\mu\text{L}$ , 0.05 mmol, 0.1 equiv.) and a  $\text{ZrO}_2$  bearing ball (12 mm<sup>3</sup>) were added to a  $\text{ZrO}_2$  grinding jar (10 mL) which was milled at 20 Hz for one hour. Then, the jar was opened 10 seconds to allow air renewal, closed again, and milled at 20 Hz for one more hour, affording a blue slurry. Subsequently, the corresponding secondary phosphine oxide **1** (0.6 mmol, 1.2 equiv.) and NaCl (174 mg, 3 mmol) were added to the jar, which was milled at 30 Hz for 3 hours. Upon completion, the resulting solid mixture was transferred to a vial (20 mL), the vial rinsed with distilled water and sonicated for 20 minutes. Then, the solid was allowed to settle and the liquor decanted. The vial was rinsed again with distilled water, sonicated for 20 minutes and filtered. The filtered solid was washed with distilled water (60 mL) and dried under vacuum affording  $\alpha$ -hydroxyphosphine oxides **3a,c-d,f,i,l,q**.

## V.- Spectroscopic data of products 3a-y.

### ((4-Chlorophenyl)(hydroxy)methyl)diphenylphosphine oxide 3a

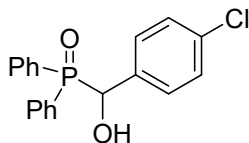

$^1\text{H}$  NMR (300 MHz,  $\text{DMSO-}d^6$ ):  $\delta$  (ppm) = 7.87 – 7.75 (m, 4H), 7.61 – 7.44 (m, 6H), 7.31 – 7.21 (m, 4H), 6.63 (dd,  $J$  = 17.4, 5.8 Hz, 1H), 5.68 (dd,  $J$  = 7.3, 5.8 Hz, 1H).  $^{31}\text{P}$  NMR (121 MHz,  $\text{DMSO-}d^6$ ):  $\delta$  (ppm) = 27.93.  $^{13}\text{C}$  NMR (75 MHz,  $\text{DMSO-}d^6$ ):  $\delta$  (ppm) =  $C_{\text{aromatic}}$ , 71.6 (d,  $J$  = 86.0 Hz). The spectroscopic data were matched with the one reported in the literature.<sup>[2]</sup>

### (Hydroxy(phenyl)methyl)diphenylphosphine oxide 3b

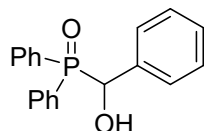

$^1\text{H}$  NMR (300 MHz,  $\text{DMSO-}d^6$ ):  $\delta$  (ppm) = 7.86 – 7.76 (m, 4H), 7.57 – 7.42 (m, 6H), 7.26 – 7.15 (m, 5H), 6.60 (dd,  $J$  = 17.8, 5.9 Hz, 1H), 5.63 (dd,  $J$  = 7.2, 5.9 Hz, 1H).  $^{31}\text{P}$  NMR (121 MHz,  $\text{DMSO-}d^6$ ):  $\delta$  (ppm) = 28.09.  $^{13}\text{C}$  NMR (75 MHz,  $\text{DMSO-}d^6$ ):  $\delta$  (ppm) =  $C_{\text{aromatic}}$ , 72.3 (d,  $J$  = 86.7 Hz). The spectroscopic data were matched with the one reported in the literature.<sup>[3]</sup>

### ((3-Chlorophenyl)(hydroxy)methyl)diphenylphosphine oxide 3c

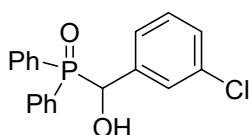

$^1\text{H}$  NMR (300 MHz,  $\text{DMSO-}d^6$ ):  $\delta$  (ppm) = 7.86 – 7.70 (m, 4H), 7.58 – 7.43 (m, 6H), 7.28 – 7.11 (m, 4H), 6.60 (dd,  $J$  = 17.3, 5.7 Hz, 1H), 5.71 – 5.60 (m, 1H).  $^{31}\text{P}$  NMR (121 MHz,  $\text{DMSO-}d^6$ ):  $\delta$  (ppm) = 28.40.  $^{13}\text{C}$  NMR (75 MHz,  $\text{DMSO-}d^6$ ):  $\delta$  (ppm) =  $C_{\text{aromatic}}$ , 71.8 (d,  $J$  = 85.3 Hz). The spectroscopic data were matched with the one reported in the literature.<sup>[3]</sup>

### **((2-Chlorophenyl)(hydroxy)methyl)diphenylphosphine oxide 3d**

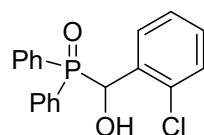

$^1\text{H}$  NMR (300 MHz,  $\text{DMSO-}d^6$ ):  $\delta$  (ppm) = 7.84 – 7.66 (m, 4H), 7.63 – 7.41 (m, 6H), 7.33 – 7.28 (m, 1H), 7.27 – 7.17 (m, 3H), 6.64 (dd,  $J$  = 18.0, 5.7 Hz, 1H), 5.96 – 5.89 (m, 1H).  $^{31}\text{P}$  NMR (121 MHz,  $\text{DMSO-}d^6$ ):  $\delta$  (ppm) = 27.82.  $^{13}\text{C}$  NMR (75 MHz,  $\text{DMSO-}d^6$ ):  $\delta$  (ppm) =  $C_{\text{aromatic}}$ , 68.7 (d,  $J$  = 87.6 Hz). The spectroscopic data were matched with the one reported in the literature.<sup>[2]</sup>

### **((4-Bromophenyl)(hydroxy)methyl)diphenylphosphine oxide 3e**

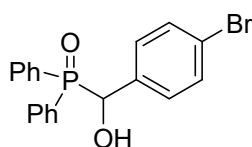

$^1\text{H}$  NMR (300 MHz,  $\text{DMSO-}d^6$ ):  $\delta$  (ppm) = 7.86 – 7.76 (m, 4H), 7.59 – 7.45 (m, 6H), 7.40 (d,  $J$  = 8.6 Hz, 2H), 7.18 (dd,  $J$  = 8.6, 2.1 Hz, 2H), 6.60 (dd,  $J$  = 17.4, 5.9 Hz, 1H), 5.66 (dd,  $J$  = 7.5, 5.9 Hz, 1H).  $^{31}\text{P}$  NMR (121 MHz,  $\text{DMSO-}d^6$ ):  $\delta$  (ppm) = 27.79.  $^{13}\text{C}$  NMR (75 MHz,  $\text{DMSO-}d^6$ ):  $\delta$  (ppm) =  $C_{\text{aromatic}}$ , 71.7 (d,  $J$  = 85.9 Hz). The spectroscopic data were matched with the one reported in the literature.<sup>[2]</sup>

### **(Hydroxy(4-nitrophenyl)methyl)diphenylphosphine oxide 3f**

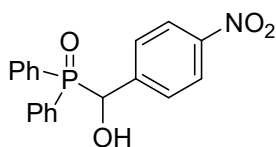

$^1\text{H}$  NMR (300 MHz,  $\text{DMSO-}d^6$ ):  $\delta$  (ppm) = 8.06 (d,  $J$  = 8.6 Hz, 2H), 7.88 – 7.71 (m, 4H), 7.58 – 7.43 (m, 8H), 6.82 (dd,  $J$  = 17.0, 5.7 Hz, 1H), 5.84 (dd,  $J$  = 9.1, 5.7 Hz, 1H).  $^{31}\text{P}$  NMR (121 MHz,  $\text{DMSO-}d^6$ ):  $\delta$  (ppm) = 28.40.  $^{13}\text{C}$  NMR (75 MHz,  $\text{DMSO-}d^6$ ):  $\delta$  (ppm) =  $C_{\text{aromatic}}$ , 72.0 (d,  $J$  = 83.6 Hz). The spectroscopic data were matched with the one reported in the literature.<sup>[4]</sup>

### (Hydroxy(3-nitrophenyl)methyl)diphenylphosphine oxide 3g

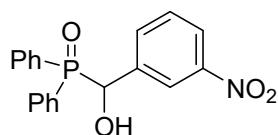

$^1\text{H}$  NMR (300 MHz,  $\text{DMSO-}d^6$ ):  $\delta$  (ppm) = 8.09 – 8.03 (m, 2H), 7.89 – 7.74 (m, 4H), 7.69 – 7.64 (m, 1H), 7.62 – 7.45 (m, 7H), 6.89 (dd,  $J$  = 16.8, 5.9 Hz, 1H), 5.92 (dd,  $J$  = 8.0, 5.9 Hz, 1H).  $^{31}\text{P}$  NMR (121 MHz,  $\text{DMSO-}d^6$ ):  $\delta$  (ppm) = 28.46.  $^{13}\text{C}$  NMR (75 MHz,  $\text{DMSO-}d^6$ ):  $\delta$  (ppm) =  $C_{\text{aromatic}}$ , 71.4 (d,  $J$  = 84.6 Hz). The spectroscopic data were matched with the one reported in the literature.<sup>[2]</sup>

### (Hydroxy(4-hydroxyphenyl)methyl)diphenylphosphine oxide 3h

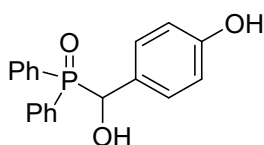

$^1\text{H}$  NMR (300 MHz,  $\text{DMSO-}d^6$ ):  $\delta$  (ppm) = 9.35 (*br s*, 1H), 7.88 – 7.72 (m, 4H), 7.59 – 7.42 (m, 6H), 7.04 (d,  $J$  = 8.5 Hz, 2H), 6.58 (d,  $J$  = 8.5 Hz, 2H), 6.32 (dd,  $J$  = 18.1, 5.7 Hz, 1H), 5.53 – 5.47 (m, 1H).  $^{31}\text{P}$  NMR (121 MHz,  $\text{DMSO-}d^6$ ):  $\delta$  (ppm) = 27.67.  $^{13}\text{C}$  NMR (75 MHz,  $\text{DMSO-}d^6$ ):  $\delta$  (ppm) =  $C_{\text{aromatic}}$ , 72.2 (d,  $J$  = 88.1 Hz). The spectroscopic data were matched with the one reported in the literature.<sup>[4]</sup>

### (Hydroxy(4-methoxyphenyl)methyl)diphenylphosphine oxide 3i

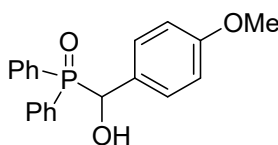

$^1\text{H}$  NMR (300 MHz,  $\text{DMSO-}d^6$ ):  $\delta$  (ppm) = 7.85 – 7.73 (m, 4H), 7.57 – 7.40 (m, 6H), 7.15 (dd,  $J$  = 8.8, 2.1 Hz, 2H), 6.74 (d,  $J$  = 8.8 Hz, 2H), 6.34 (dd,  $J$  = 17.8, 5.9 Hz, 1H), 5.58 – 5.49 (m, 1H), 3.67 (s, 3H).  $^{31}\text{P}$  NMR (121 MHz,  $\text{DMSO-}d^6$ ):  $\delta$  (ppm) = 27.68.  $^{13}\text{C}$  NMR (75 MHz,  $\text{DMSO-}d^6$ ):  $\delta$  (ppm) =  $C_{\text{aromatic}}$ , 72.0 (d,  $J$  = 87.6 Hz), 55.4. The spectroscopic data were matched with the one reported in the literature.<sup>[3]</sup>

### (Hydroxy(2-methoxyphenyl)methyl)diphenylphosphine oxide 3j

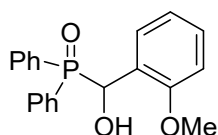

$^1\text{H}$  NMR (300 MHz,  $\text{DMSO-}d^6$ ):  $\delta$  (ppm) = 7.85 – 7.76 (m, 2H), 7.67 – 7.46 (m, 6H), 7.45 – 7.37 (m, 2H), 7.25 (dt,  $J$  = 7.6, 1.9 Hz, 1H), 7.18 (tt,  $J$  = 7.6, 1.9 Hz, 1H), 6.87 – 6.76 (m, 2H), 6.39 (dd,  $J$  = 16.2, 6.4 Hz, 1H), 5.96 (dd,  $J$  = 6.4, 4.2 Hz, 1H), 3.46 (s, 3H).  $^{31}\text{P}$  NMR (121 MHz,  $\text{DMSO-}d^6$ ):  $\delta$  (ppm) = 27.95.  $^{13}\text{C}$  NMR (75 MHz,  $\text{DMSO-}d^6$ ):  $\delta$  (ppm) =  $C_{\text{aromatic}}$ , 65.2 (d,  $J$  = 88.5 Hz), 55.5. The spectroscopic data were matched with the one reported in the literature.<sup>[4]</sup>

### (Furan-2-yl(hydroxy)methyl)diphenylphosphine oxide 3k

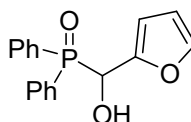

$^1\text{H}$  NMR (300 MHz,  $\text{DMSO-}d^6$ ):  $\delta$  (ppm) = 7.91 – 7.82 (m, 2H), 7.80 – 7.71 (m, 2H), 7.59 – 7.42 (m, 7H), 6.53 (dd,  $J$  = 14.3, 6.5 Hz, 1H), 6.34 – 6.31 (m, 1H), 6.23 – 6.20 (m, 1H), 5.65 – 5.58 (m, 1H).  $^{31}\text{P}$  NMR (121 MHz,  $\text{DMSO-}d^6$ ):  $\delta$  (ppm) = 26.74.  $^{13}\text{C}$  NMR (75 MHz,  $\text{DMSO-}d^6$ ):  $\delta$  (ppm) =  $C_{\text{(hetero)aromatic}}$ , 66.9 (d,  $J$  = 90.1 Hz). The spectroscopic data were matched with the one reported in the literature.<sup>[2]</sup>

### (Hydroxy(thiophen-2-yl)methyl)diphenylphosphine oxide 3l

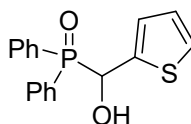

$^1\text{H}$  NMR (300 MHz,  $\text{DMSO-}d^6$ ):  $\delta$  (ppm) = 7.90 – 7.77 (m, 4H), 7.58 – 7.45 (m, 6H), 7.35 (dt,  $J$  = 4.9, 1.5 Hz, 1H), 6.99 – 6.87 (m, 3H), 5.94 – 5.88 (m, 1H).  $^{31}\text{P}$  NMR (121 MHz,  $\text{DMSO-}d^6$ ):  $\delta$  (ppm) = 27.14.  $^{13}\text{C}$  NMR (75 MHz,  $\text{DMSO-}d^6$ ):  $\delta$  (ppm) =  $C_{\text{(hetero)aromatic}}$ , 69.0 (d,  $J$  = 90.4 Hz). The spectroscopic data were matched with the one reported in the literature.<sup>[3]</sup>

**(E)-(1-Hydroxy-3-(2-nitrophenyl)allyl)diphenylphosphine oxide 3m**

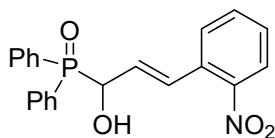

$^1\text{H}$  NMR (300 MHz,  $\text{DMSO-}d^6$ ):  $\delta$  (ppm) = 7.91 – 7.79 (m, 5H), 7.67 – 7.42 (m, 9H), 6.93 – 6.83 (m, 1H), 6.56 – 6.43 (m, 2H), 5.42 – 5.30 (m, 1H).  $^{31}\text{P}$  NMR (121 MHz,  $\text{DMSO-}d^6$ ):  $\delta$  (ppm) = 28.75.  $^{13}\text{C}$  NMR (75 MHz,  $\text{DMSO-}d^6$ ):  $\delta$  (ppm) =  $C_{\text{aromatic}}$ ,  $C_{\text{vinyl}}$ , 71.6 (d,  $J$  = 86.4 Hz).

**(Hydroxy(naphthalen-1-yl)methyl)diphenylphosphine oxide 3n**

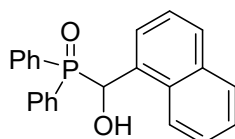

$^1\text{H}$  NMR (300 MHz,  $\text{DMSO-}d^6$ ):  $\delta$  (ppm) = 8.34 – 8.23 (m, 1H), 7.90 – 7.71 (m, 6H), 7.62 – 7.25 (m, 10H), 6.56 (dd,  $J$  = 19.5, 4.0 Hz, 1H), 6.45 – 6.36 (m, 1H).  $^{31}\text{P}$  NMR (121 MHz,  $\text{DMSO-}d^6$ ):  $\delta$  (ppm) = 28.80.  $^{13}\text{C}$  NMR (75 MHz,  $\text{DMSO-}d^6$ ):  $\delta$  (ppm) =  $C_{\text{aromatic}}$ , 68.9 (d,  $J$  = 87.9 Hz). The spectroscopic data were matched with the one reported in the literature.<sup>[3]</sup>

**(Cyclohexyl(hydroxy)methyl)diphenylphosphine oxide 3o**

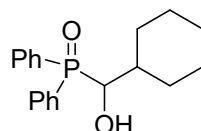

$^1\text{H}$  NMR (300 MHz,  $\text{DMSO-}d^6$ ):  $\delta$  (ppm) = 7.93 – 7.85 (m, 2H), 7.82 – 7.74 (m, 2H), 7.55 – 7.42 (m, 6H), 5.66 (dd,  $J$  = 11.7, 7.7 Hz, 1H), 4.24 – 4.16 (m, 1H), 1.77 – 1.45 (m, 6H), 1.23 – 0.95 (m, 5H).  $^{31}\text{P}$  NMR (121 MHz,  $\text{DMSO-}d^6$ ):  $\delta$  (ppm) = 27.97.  $^{13}\text{C}$  NMR (75 MHz,  $\text{DMSO-}d^6$ ):  $\delta$  (ppm) =  $C_{\text{aromatic}}$ , 73.7 (d,  $J$  = 88.2 Hz), 30.5 (d,  $J$  = 8.2 Hz), 28.1 (d,  $J$  = 5.7 Hz), 26.3 (d,  $J$  = 5.4 Hz), 26.0. The spectroscopic data were matched with the one reported in the literature.<sup>[3]</sup>

### (1-Hydroxyheptyl)diphenylphosphine oxide 3p

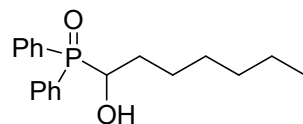

$^1\text{H}$  NMR (300 MHz,  $\text{DMSO-}d^6$ ):  $\delta$  (ppm) = 7.91 – 7.70 (m, 4H), 7.60 – 7.41 (m, 6H), 5.74 – 5.60 (m, 1H), 4.42 – 4.28 (m, 1H), 1.64 – 1.08 (m, 10H), 0.88 – 0.74 (m, 3H).  $^{31}\text{P}$  NMR (121 MHz,  $\text{DMSO-}d^6$ ):  $\delta$  (ppm) = 29.09.  $^{13}\text{C}$  NMR (75 MHz,  $\text{DMSO-}d^6$ ):  $\delta$  (ppm) =  $C_{\text{aromatic}}$ , 69.3 (d,  $J$  = 88.4 Hz), 31.6, 30.6 (d,  $J$  = 4.0 Hz), 28.8, 25.8 (d,  $J$  = 11.9 Hz), 22.4, 14.4.

### ((4-Chlorophenyl)(hydroxy)methyl)bis(4-methoxyphenyl)phosphine oxide 3q

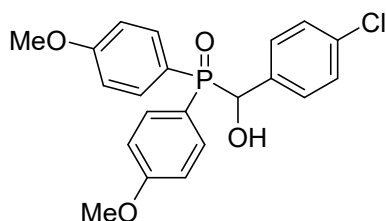

$^1\text{H}$  NMR (300 MHz,  $\text{DMSO-}d^6$ ):  $\delta$  (ppm) = 7.75 – 7.63 (m, 4H), 7.30 – 7.20 (m, 4H), 7.07 – 7.00 (m, 4H), 6.51 (dd,  $J$  = 17.6, 5.8 Hz, 1H), 5.54 (dd,  $J$  = 8.1, 5.8 Hz, 1H), 3.79 (s, 6H).  $^{31}\text{P}$  NMR (121 MHz,  $\text{DMSO-}d^6$ ):  $\delta$  (ppm) = 28.13.  $^{13}\text{C}$  NMR (75 MHz,  $\text{DMSO-}d^6$ ):  $\delta$  (ppm) =  $C_{\text{aromatic}}$ , 72.0 (d,  $J$  = 86.9 Hz), 55.7, 55.7.

### (Hydroxy(phenyl)methyl)bis(4-methoxyphenyl)phosphine oxide 3r

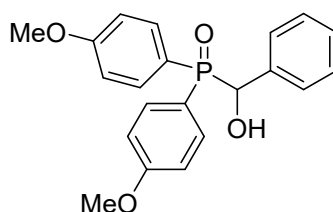

$^1\text{H}$  NMR (300 MHz,  $\text{DMSO-}d^6$ ):  $\delta$  (ppm) = 7.74 – 7.63 (m, 4H), 7.24 – 7.15 (m, 5H), 7.01 (dd,  $J$  = 8.8, 2.4 Hz, 4H), 6.48 (dd,  $J$  = 17.9, 5.8 Hz, 1H), 5.49 (dd,  $J$  = 8.1, 5.8 Hz, 1H), 3.79 (s, 3H), 3.78 (s, 3H).  $^{31}\text{P}$  NMR (121 MHz,  $\text{DMSO-}d^6$ ):  $\delta$  (ppm) = 28.25.  $^{13}\text{C}$  NMR (75 MHz,  $\text{DMSO-}d^6$ ):  $\delta$  (ppm) =  $C_{\text{aromatic}}$ , 72.7 (d,  $J$  = 87.7 Hz), 55.7, 55.7. The spectroscopic data were matched with the one reported in the literature.<sup>[5]</sup>

### (Hydroxy(4-methoxyphenyl)methyl)bis(4-methoxyphenyl)phosphine oxide 3s

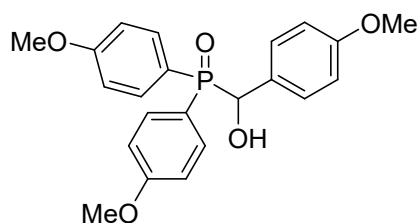

$^1\text{H}$  NMR (300 MHz,  $\text{DMSO-}d^6$ ):  $\delta$  (ppm) = 7.72 – 7.63 (m, 4H), 7.13 (dd,  $J$  = 8.8, 2.1 Hz, 2H), 7.05 – 6.98 (m, 4H), 6.76 (d,  $J$  = 8.8 Hz, 2H), 6.36 (dd,  $J$  = 17.9, 5.8 Hz, 1H), 5.46 – 5.40 (m, 1H), 3.79 (s, 3H), 3.78 (s, 3H), 3.68 (s, 3H).  $^{31}\text{P}$  NMR (121 MHz,  $\text{DMSO-}d^6$ ):  $\delta$  (ppm) = 27.99.  $^{13}\text{C}$  NMR (75 MHz,  $\text{DMSO-}d^6$ ):  $\delta$  (ppm) =  $C_{\text{aromatic}}$ , 72.2 (d,  $J$  = 88.9 Hz), 55.7, 55.7, 55.4. The spectroscopic data were matched with the one reported in the literature.<sup>[6]</sup>

### Dibutyl((4-chlorophenyl)(hydroxy)methyl)phosphine oxide 3t

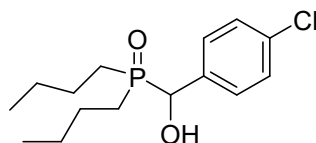

$^1\text{H}$  NMR (300 MHz,  $\text{DMSO-}d^6$ ):  $\delta$  (ppm) = 7.42 – 7.37 (m, 4H), 6.33 (*br s*, 1H), 4.91 (d,  $J$  = 9.2 Hz, 1H), 1.76 – 1.61 (m, 2H), 1.55 – 1.27 (m, 8H), 1.25 – 1.14 (m, 2H), 0.86 (t,  $J$  = 6.8 Hz, 3H), 0.76 (t,  $J$  = 6.8 Hz, 3H).  $^{31}\text{P}$  NMR (121 MHz,  $\text{DMSO-}d^6$ ):  $\delta$  (ppm) = 48.46.  $^{13}\text{C}$  NMR (75 MHz,  $\text{DMSO-}d^6$ ):  $\delta$  (ppm) = 138.3, 132.1 (d,  $J$  = 2.5 Hz), 128.8 (d,  $J$  = 3.5 Hz), 128.2, 70.0 (d,  $J$  = 77.7 Hz),  $C_{n\text{Bu}}$ .

### ((4-Chlorophenyl)(hydroxy)methyl)diphenylphosphine sulfide 3u

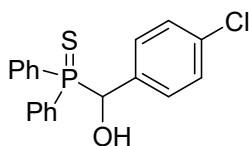

$^1\text{H}$  NMR (300 MHz,  $\text{CDCl}_3$ ):  $\delta$  (ppm) = 8.00 – 7.89 (m, 2H), 7.66 – 7.44 (m, 6H), 7.39 – 7.30 (m, 2H), 7.12 (d,  $J$  = 8.6 Hz, 2H), 6.98 (dd,  $J$  = 8.6, 2.3 Hz, 2H), 5.56 (s, 1H), 4.09 (*br s*, 1H).  $^{31}\text{P}$  NMR (121 MHz,  $\text{CDCl}_3$ ):  $\delta$  (ppm) = 52.59.  $^{13}\text{C}$  NMR (75 MHz,  $\text{CDCl}_3$ ):  $\delta$  (ppm) =  $C_{\text{aromatic}}$ , 72.8 (d,  $J$  = 54.8 Hz).

**(Hydroxy(3-nitrophenyl)methyl)diphenylphosphine sulfide 3v**

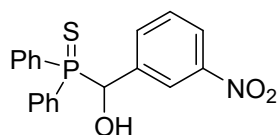

$^1\text{H}$  NMR (401 MHz,  $\text{CDCl}_3$ ):  $\delta$  (ppm) = 8.05 – 8.01 (m, 1H), 7.99 – 7.92 (m, 2H), 7.73 – 7.71 (m, 1H), 7.65 – 7.59 (m, 1H), 7.58 – 7.43 (m, 6H), 7.36 – 7.29 (m, 3H), 5.70 (d,  $J = 2.9$  Hz, 1H), 4.2 (*br s*, 1H).  $^{31}\text{P}$  NMR (162 MHz,  $\text{CDCl}_3$ ):  $\delta$  (ppm) = 53.51.  $^{13}\text{C}$  NMR (75 MHz,  $\text{CDCl}_3$ ):  $\delta$  (ppm) =  $C_{\text{aromatic}}$ , 72.2 (d,  $J = 53.6$  Hz).

**(E)-(1-Hydroxy-3-(2-nitrophenyl)allyl)diphenylphosphine sulfide 3w**

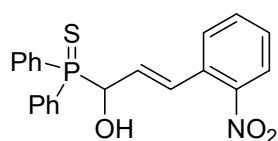

$^1\text{H}$  NMR (401 MHz,  $\text{CDCl}_3$ ):  $\delta$  (ppm) = 8.01 – 7.93 (m, 2H), 7.92 – 7.82 (m, 3H), 7.59 – 7.45 (m, 7H), 7.41 – 7.35 (m, 1H), 7.32 (d,  $J = 7.8$  Hz, 1H), 7.08 (dd,  $J = 15.7, 4.9$  Hz, 1H), 6.18 – 6.09 (m, 1H), 5.25 – 5.19 (m, 1H), 3.52 (*br s*, 1H).  $^{31}\text{P}$  NMR (162 MHz,  $\text{CDCl}_3$ ):  $\delta$  (ppm) = 49.13.  $^{13}\text{C}$  NMR (75 MHz,  $\text{CDCl}_3$ ):  $\delta$  (ppm) =  $C_{\text{aromatic}}$ ,  $C_{\text{vinyl}}$ , 73.0 (d,  $J = 58.6$  Hz).

**((4-Chlorophenyl)(hydroxy)methyl)diphenylphosphine selenide 3x**

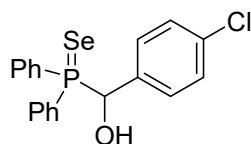

$^1\text{H}$  NMR (300 MHz,  $\text{CDCl}_3$ ):  $\delta$  (ppm) = 7.97 – 7.88 (m, 2H), 7.61 – 7.43 (m, 6H), 7.37 – 7.29 (m, 2H), 7.10 (d,  $J = 8.6$  Hz, 2H), 6.96 (dd,  $J = 8.6, 2.3$  Hz, 2H), 5.56 (m, 1H), 2.58 (s, 1H).  $^{31}\text{P}$  NMR (121 MHz,  $\text{CDCl}_3$ ):  $\delta$  (ppm) = 50.60.  $^{13}\text{C}$  NMR (75 MHz,  $\text{CDCl}_3$ ):  $\delta$  (ppm) =  $C_{\text{aromatic}}$ , 71.7 (d,  $J = 46.1$  Hz).

**(Hydroxy(3-nitrophenyl)methyl)diphenylphosphine selenide 3y**

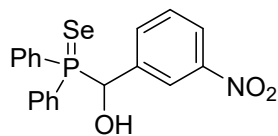

$^1\text{H}$  NMR (300 MHz,  $\text{CDCl}_3$ ):  $\delta$  (ppm) = 8.08 – 8.02 (m, 1H), 8.00 – 7.91 (m, 2H), 7.73 – 7.68 (m, 1H), 7.65 – 7.43 (m, 7H), 7.38 – 7.30 (m, 3H), 5.71 (d,  $J$  = 2.7 Hz, 1H).  $^{31}\text{P}$  NMR (121 MHz,  $\text{CDCl}_3$ ):  $\delta$  (ppm) = 51.99.  $^{13}\text{C}$  NMR (75 MHz,  $\text{CDCl}_3$ ):  $\delta$  (ppm) =  $\text{C}_{\text{aromatic}}$ , 71.0 (d,  $J$  = 45.3 Hz).

## VI.- Green chemistry metrics (GCM) calculations

Green Chemistry metrics (GCM) were calculated from  $\alpha$ -hydroxy benzyl- and alkylphosphine oxides compounds **3a-3l**, **3o**.

In order to perform the Green Chemistry Metrics calculation, an *electrochemically oxidative process*<sup>[2]</sup> was used for comparison except for compound **3c**, which comparison was performed using a *DES-assisted (Deep Eutectic Solvent) addition protocol*<sup>[2]</sup> and for compounds **3f,3h** and **3j**, which comparison was performed using a conventional solution-based method<sup>[3]</sup>. Note that the crude product obtained by the electrochemically oxidative process was purified by column chromatography (petroleum ether/ethyl acetate = 2/1, v/v) and the conventional solution-based product was purified by recrystallization (THF-Methanol) and this Energy usage calculations not been considered for the GCM calculations.

Green chemistry metrics formulas<sup>[7]</sup> were customized for this reaction. Note that quantities are expressed in grams or grams/mol unless otherwise specified.

### VI.1.- E-factor

#### Mechanosynthesis

##### General formula used for compounds **3a,3e-3h,3j**

$$E = \frac{\text{diphenylphosphine oxide} + \text{aldehyde (2a,2e - 2h,2j)} - \text{total product}}{\text{total product}}$$

##### General formula used for compounds **3b - 3d,3i,3k - 3l,3o**

$$E = \frac{\text{diphenylphosphine oxide} + \text{aldehyde (2b - 2d,3i, 2k - 2l,2o)} + \text{sodium chloride} - \text{total product}}{\text{total product}}$$

Mechanosynthesis of (4-chlorophenyl)(hydroxy)methyl)diphenylphosphine oxide (**3a**):

##### Formula used:

$$E = \frac{\text{diphenylphosphine oxide} + 4 - \text{chlorobenzaldehyde (2a)} - \text{total product}}{\text{total product}}$$

$$E = \frac{0.101 + 0.0702 - 0.144}{0.144}$$

$$E = 0.188$$

Mechanosynthesis of (hydroxy(phenyl)methyl)diphenylphosphine oxide (**3b**):

##### Formula used:

$$E = \frac{\text{diphenylphosphine oxide} + \text{benzene (2b)} + \text{NaCl} - \text{total product}}{\text{total product}}$$

$$E = \frac{0.101 + 0.0391 + 0.174 - 0.143}{0.143}$$

$$E = 1.20$$

Mechanosynthesis of ((3-chlorophenyl)(hydroxy)diphenylphosphine oxide (**3c**):

**Formula used:**

$$E = \frac{\text{diphenylphosphine oxide} + 3\text{-chlorobenzaldehyde (2c)} + \text{NaCl} - \text{total product}}{\text{total product}}$$

$$E = \frac{0.101 + 0.0702 + 0.174 - 0.144}{0.144}$$

$$E = 1.39$$

*Mechanosynthesis of (2-chlorophenyl)(hydroxy)methyl)diphenylphosphine oxide (3d):*

**Formula used:**

$$E = \frac{\text{diphenylphosphine oxide} + 2\text{-chlorobenzaldehyde (2d)} + \text{NaCl} - \text{total product}}{\text{total product}}$$

$$E = \frac{0.101 + 0.0702 + 0.174 - 0.144}{0.144}$$

$$E = 1.39$$

*Mechanosynthesis of (4-bromophenyl)(hydroxy)methyl)diphenylphosphine oxide (3e):*

**Formula used:**

$$E = \frac{\text{diphenylphosphine oxide} + 4\text{-bromobenzaldehyde (2e)} - \text{total product}}{\text{total product}}$$

$$E = \frac{0.101 + 0.0925 - 0.156}{0.156}$$

$$E = 0.240$$

*Mechanosynthesis of (hydroxy(4-nitrophenyl)methyl)diphenylphosphine oxide (3f):*

**Formula used:**

$$E = \frac{\text{diphenylphosphine oxide} + 4\text{-nitrobenzaldehyde (2f)} - \text{total product}}{\text{total product}}$$

$$E = \frac{0.101 + 0.0756 - 0.145}{0.145}$$

$$E = 0.217$$

*Mechanosynthesis of (hydroxy(3-nitrophenyl)methyl)diphenylphosphine oxide (3g):*

**Formula used:**

$$E = \frac{\text{diphenylphosphine oxide} + 3\text{-nitrobenzaldehyde (2g)} - \text{total product}}{\text{total product}}$$

$$E = \frac{0.101 + 0.0756 - 0.169}{0.169}$$

$$E = 0.0450$$

*Mechanosynthesis of (hydroxy(4-hydroxy)methyl)diphenylphosphine oxide (3h):*

**Formula used:**

$$E = \frac{\text{diphenylphosphine oxide} + 4\text{-hydroxybenzaldehyde (2h)} + \text{NaCl} - \text{total product}}{\text{total product}}$$

$$E = \frac{0.101 + 0.0611 + 0.174 - 0.148}{0.148}$$

$$E = 1.27$$

*Mechanosynthesis of (hydroxy(4-methoxy)methyl)diphenylphosphine oxide (3i):*

**Formula used:**

$$E = \frac{\text{diphenylphosphine oxide} + 4\text{-methoxybenzaldehyde (2i)} + \text{NaCl} - \text{total product}}{\text{total product}}$$

$$E = \frac{0.101 + 0.0680 + 0.174 - 0.189}{0.189}$$

$$E = 0.814$$

*Mechanosynthesis of (hydroxy(2-methoxy)methyl)diphenylphosphine oxide (3j):*

**Formula used:**

$$E = \frac{\text{diphenylphosphine oxide} + 2\text{-methoxybenzaldehyde (2j)} + \text{NaCl} - \text{total product}}{\text{total product}}$$

$$E = \frac{0.101 + 0.0680 + 0.174 - 0.160}{0.160}$$

$$E = 1.14$$

*Mechanosynthesis of (furan-2-yl(hydroxy)methyl)diphenylphosphine oxide (3k):*

**Formula used:**

$$E = \frac{\text{diphenylphosphine oxide} + \text{furan (2k)} + \text{NaCl} - \text{total product}}{\text{total product}}$$

$$E = \frac{0.101 + 0.0340 + 0.174 - 0.141}{0.141}$$

$$E = 1.19$$

Mechanosynthesis of (hydroxy(thiophen-2-yl)methyl)diphenylphosphine oxide (**3l**):

**Formula used:**

$$E = \frac{\text{diphenylphosphine oxide} + \text{thiophene (2l)} + \text{NaCl} - \text{total product}}{\text{total product}}$$

$$E = \frac{0.101 + 0.0421 + 0.174 - 0.151}{0.151}$$

$$E = 1.10$$

Mechanosynthesis of (cyclohexyl(hydroxy)methyl)diphenylphosphine oxide (**3o**):

**Formula used:**

$$E = \frac{\text{diphenylphosphine oxide} + \text{cyclohexane (2o)} + \text{NaCl} - \text{total product}}{\text{total product}}$$

$$E = \frac{0.101 + 0.0421 + 0.174 - 0.137}{0.137}$$

$$E = 1.31$$

**Electrochemistry, Deep Eutectic Solvent (DES) and conventional solution-based method**

**General formula used for compounds 3a-3b,3d-3e,3g,3i,3k,3l,3o obtained by electrochemically oxidative synthesis\***

$$E = \frac{\text{diphenylphosphine oxide} + \text{aldehyde (2a - 2b,2d - 2e,2g,2i,2k,2l,2o)} + \text{MeCN} + \text{Dioxane} - \text{total product}}{\text{total product}}$$

**General formula used for compounds 3c**

$$E = \frac{\text{diphenylphosphine oxide} + \text{aldehyde (2c)} + n - \text{BuLi} + \text{hexane} + \text{choline chloride} - \text{total product}}{\text{total product}}$$

**General formula used for compounds 3f,3h,3j\*\***

$$E = \frac{\text{diphenylphosphine oxide} + \text{aldehyde (2f,2h,2j)} + \text{THF} - \text{total product}}{\text{total product}}$$

\*The crude product was purified by column chromatography (petroleum ether/ethyl acetate = 2/1, v/v).

\*\*The crude product was purified by recrystallization (THF-Methanol).

Electrochemically oxidative synthesis of (4-chlorophenyl)(hydroxy)methyl)diphenylphosphine oxide (**3a**):\*

**Formula used:**

$$E = \frac{\text{diphenylphosphine oxide} + 4 - \text{chlorobenzaldehyde (2a)} + \text{MeCN} + \text{Dioxane} - \text{total product}}{\text{total product}}$$

$$E = \frac{0.101 + 0.758 + 1.18 + 1.55 - 0.063}{0.063}$$

$$E = 55.96$$

Electrochemically oxidative synthesis of *(hydroxy(phenyl)methyl)diphenylphosphine oxide (3b)\**:

**Formula used:**

$$E = \frac{\text{diphenylphosphine oxide} + \text{benzene (2b)} + \text{MeCN} + \text{Dioxane} - \text{total product}}{\text{total product}}$$

$$E = \frac{0.101 + 0.2929 + 1.18 + 1.55 - 0.120}{0.120}$$

$$E = 25.03$$

Deep Eutectic Solvent (DES) synthesis of *(3-chlorophenyl)(hydroxy)methyl)diphenylphosphine oxide (3c)*:

$$E = \frac{\text{diphenylphosphine oxide} + 3\text{-chlorobenzaldehyde (2c)} + n\text{-BuLi} + \text{hexane} + \text{coline chloride} - \text{total product}}{\text{total product}}$$

$$E = \frac{0.302 + 0.228 + 0.104 + 0.423 + 0.226 - 0.501}{0.501}$$

$$E = 1.56$$

Electrochemically oxidative synthesis of *(2-chlorophenyl)(hydroxy)methyl)diphenylphosphine oxide (3d)\**:

**Formula used:**

$$E = \frac{\text{diphenylphosphine oxide} + 2\text{-chlorobenzaldehyde (2d)} + \text{MeCN} + \text{Dioxane} - \text{total product}}{\text{total product}}$$

$$E = \frac{0.101 + 0.758 + 1.18 + 1.55 - 0.0340}{0.0340}$$

$$E = 104.55$$

Electrochemically oxidative synthesis of *(4-bromophenyl)(hydroxy)methyl)diphenylphosphine oxide (3e)\**:

**Formula used:**

$$E = \frac{\text{diphenylphosphine oxide} + 4\text{-bromobenzaldehyde (2e)} + \text{MeCN} + \text{Dioxane} - \text{total product}}{\text{total product}}$$

$$E = \frac{0.101 + 0.694 + 1.18 + 1.55 - 0.054}{0.054}$$

$$E = 64.28$$

Conventional solution synthesis of *(hydroxy(4-nitrophenyl)hydroxy)methyl)diphenylphosphine oxide (3f)\*\**:

**Formula used:**

$$E = \frac{\text{diphenylphosphine oxide} + 4\text{-nitrobenzaldehyde (2f)} + \text{THF} - \text{total product}}{\text{total product}}$$

$$E = \frac{1.01 + 0.756 + 17.76 - 1.17}{1.17}$$

$$E = 15.7$$

Electrochemically oxidative synthesis of *(Hydroxy(3-nitrophenyl)methyl)diphenylphosphine Oxide (3g)\**:

**Formula used:**

$$E = \frac{\text{diphenylphosphine oxide} + 3\text{-nitrobenzaldehyde (2g)} + \text{MeCN} + \text{Dioxane} - \text{total product}}{\text{total product}}$$

$$E = \frac{0.101 + 0.5667 + 1.18 + 1.55 - 0.071}{0.071}$$

$$E = 46.86$$

Conventional solution synthesis of *(hydroxy(4-hydroxy)methyl)diphenylphosphine oxide (3h)\**:

**Formula used:**

$$E = \frac{\text{diphenylphosphine oxide} + 4\text{-hydroxibenzaldehyde (2h)} + \text{THF} - \text{total product}}{\text{total product}}$$

$$E = \frac{1.01 + 0.6106 + 17.76 - 1.542}{1.542}$$

$$E = 11.56$$

Electrochemically oxidative synthesis of *(Hydroxy(4-methoxy)methyl)diphenylphosphine Oxide (3i)\**:

**Formula used:**

$$E = \frac{\text{diphenylphosphine oxide} + 4\text{-methoxybenzaldehyde (2i)} + \text{MeCN} + \text{Dioxane} - \text{total product}}{\text{total product}}$$

$$E = \frac{0.101 + 0.511 + 1.18 + 1.55 - 0.291}{0.291}$$

$$E = 10.50$$

Conventional solution synthesis of *(hydroxy(2-methoxy)methyl)diphenylphosphine oxide (3j)\*\**:

**Formula used:**

$$E = \frac{\text{diphenylphosphine oxide} + 2\text{-methoxybenzaldehyde (2j)} + \text{THF} - \text{total product}}{\text{total product}}$$

$$E = \frac{1.01 + 0.6808 + 17.76 - 1.692}{1.692}$$

$$E = 10.50$$

Electrochemically oxidative synthesis of *(furan-2-yl(hydroxy)methyl)diphenylphosphine oxide (3k)\**:

**Formula used:**

$$E = \frac{\text{diphenylphosphine oxide} + \text{furan (2k)} + \text{MeCN} + \text{Dioxane} - \text{total product}}{\text{total product}}$$

$$E = \frac{0.101 + 0.2552 + 1.18 + 1.55 - 0.064}{0.064}$$

$$E = 47.22$$

Electrochemically oxidative synthesis of *(hydroxy(thiophen-2-yl)methyl)diphenylphosphine oxide (3l)\**:

**Formula used:**

$$E = \frac{\text{diphenylphosphine oxide} + \text{thiophene (2l)} + \text{MeCN} + \text{Dioxane} - \text{total product}}{\text{total product}}$$

$$E = \frac{0.101 + 0.3156 + 1.18 + 1.55 - 0.072}{0.072}$$

$$E = 42.70$$

Electrochemically oxidative synthesis of *(cyclohexyl(hydroxy)methyl)diphenylphosphine oxide (3o)\**:

**Formula used:**

$$E = \frac{\text{diphenylphosphine oxide} + \text{cyclohexane (2o)} + \text{MeCN} + \text{Dioxane} - \text{total product}}{\text{total product}}$$

$$E = \frac{0.101 + 0.3156 + 1.18 + 1.55 - 0.049}{0.049}$$

$$E = 63.21$$

## VI.2. Energy usage calculations

Energy consumption and energy saved of the mechanochemistry (**3a-3l,3o**), and electrochemically oxidative (**3a-3b,3d-3e,3g,3i,3k,3l,3o**), Deep Eutectic Solvent (DES) (**3c**) or conventional solution-based synthesis (**3f,3h,3j**) processes were calculated based on the following equation (1 kWh = 3.6 MJ):

$$\text{Energy consumption by unit operation/process (kWh)} = \text{Power rating of the instrument (kW)} \times \text{Time of operation (h)}$$

$$\% \text{ Energy saved} = \frac{\text{Energy used (Conventional method)} - \text{Mechanosynthesis}}{\text{Energy used in Conventional method}} \times 100$$

Power consumption of:

- Vibratory shaker mill (Retsch, MM400) = 150 W (2 station)
- Hot plate stirrer (Hei-standard), = 800 W
- Electrochemically Power Supply (HYELEC HY-3010B) = 360 W
- Laboratory vacuum pump (conventional) = 1500 W

Reactions were calculated for 0.1 g scale reaction. Projections will show similar conclusions.

0.1 g:

Energy used for 0.1 g scale reaction:

Mechanosynthesis of (4-chlorophenyl)(hydroxy)methyl)diphenylphosphine oxide (**3a**), (hydroxy(phenyl)methyl)diphenylphosphine oxide (**3b**), (4-chlorophenyl)(hydroxy)methyl)diphenylphosphine oxide (**3c**), (2-chlorophenyl)(hydroxy)methyl)diphenylphosphine oxide (**3d**), (4-bromophenyl)(hydroxy)methyl)diphenylphosphine oxide (**3e**), (hydroxy(4-nitrophenyl)methyl)diphenylphosphine oxide (**3f**), (hydroxy(3-nitrophenyl)methyl)diphenylphosphine oxide (**3g**), (hydroxy(4-hydroxy)methyl)diphenylphosphine oxide (**3h**), (hydroxy(4-methoxy)methyl)diphenylphosphine oxide (**3i**), (hydroxy(2-methoxy)methyl)diphenylphosphine oxide (**3j**), (furan-2-yl)(hydroxy)methyl)diphenylphosphine oxide (**3k**), (hydroxy(thiophen-2-yl)methyl)diphenylphosphine oxide (**3l**), (cyclohexyl)(hydroxy)methyl)diphenylphosphine oxide (**3o**),

Energy used = (0.15 kW x 1.5 h) = 0.225 kwh/0.0001 kg = 2250 kwh/kg = 8100 MJ/kg (each product)

Electrochemically oxidative synthesis of (4-chlorophenyl)(hydroxy)methyl)diphenylphosphine oxide (**3a**), (hydroxy(phenyl)methyl)diphenylphosphine oxide (**3b**), (4-bromophenyl)(hydroxy)methyl)diphenylphosphine oxide (**3e**), (hydroxy(3-nitrophenyl)methyl)diphenylphosphine oxide (**3g**), (hydroxy(4-methoxy)methyl)diphenylphosphine oxide (**3i**), (furan-2-yl)(hydroxy)methyl)diphenylphosphine oxide (**3k**), (hydroxy(thiophen-2-yl)methyl)diphenylphosphine oxide (**3l**), (cyclohexyl)(hydroxy)methyl)diphenylphosphine oxide (**3o**),

Energy used = (0.36 kW x 1.5 h) + (1.5 kW x 1 h) = 2.04 kwh/0.0001 kg = 20400 kwh/kg = 73440 MJ/kg (each product)

Deep Eutectic Solvent (DES) synthesis of (4-chlorophenyl)(hydroxy)methyl)diphenylphosphine oxide (**3c**)

Energy used (**3c**) = (0.8 kW x 0.50 h) = 0.4 kwh/0.0001 kg = 4000 kwh/kg = 14400 MJ/kg (each product)

Conventional solution-based synthesis of (hydroxy(4-nitrophenyl)methyl)diphenylphosphine oxide (**3f**), (hydroxy(4-hydroxy)methyl)diphenylphosphine oxide (**3h**), (hydroxy(2-methoxy)methyl)diphenylphosphine oxide (**3j**),

Energy used (3f) = (0.8 kW x 0.12 h) + (1.5 kW x 6 h) = 9.10 kwh/0.0001 kg = 90960 kwh/ kg = 327456 MJ/kg (each product)

Energy used (3h) = (0.8 kW x 0.83 h) + (1.5 kW x 6 h) = 9.66 kwh/0.0001 kg = 96640 kwh/ kg = 347904 MJ/kg (each product)

Energy used (3j) = (0.8 kW x 4 h) + (1.5 kW x 6 h) = 12.2 kwh/0.0001 kg = 122000 kwh/ kg = 439200 MJ/kg (each product)

To make the energy calculations easier to read and facilitate comparison between the mechanochemistry, electrochemically oxidative and solution-based synthesis, all the information has been summarised in Table SI\_1:

**Table SI\_1.** Energy consumption for the synthesis of compounds **3a** to **3j** using different methods.

| Compound                                  | Energy Consumption (kwh) | Energy Consumption (kwh.kg <sup>-1</sup> ) | Energy Consumption (MJ.kg <sup>-1</sup> ) |
|-------------------------------------------|--------------------------|--------------------------------------------|-------------------------------------------|
| <b>Mechanochemistry method</b>            |                          |                                            |                                           |
| <b>3a-3l,3o</b>                           | 0.225                    | 2250                                       | 8100                                      |
| <b>Electrochemically oxidative method</b> |                          |                                            |                                           |
| <b>3a-3b,3d-3e,3g,3i,3k,3l,3o</b>         | 2.04                     | 20400                                      | 73440                                     |
| <b>Deep Eutectic Solvent (DES) method</b> |                          |                                            |                                           |
| <b>3c</b>                                 | 0.400                    | 4000                                       | 14400                                     |
| <b>Conventional solution-based method</b> |                          |                                            |                                           |
| <b>3f</b>                                 | 9.10                     | 90960                                      | 327456                                    |
| <b>3h</b>                                 | 9.66                     | 96640                                      | 347904                                    |
| <b>3j</b>                                 | 12.2                     | 122000                                     | 439200                                    |

### Energy saved

% Energy saved for the synthesis of (4-chlorophenyl)(hydroxy)methyl)diphenylphosphine oxide (**3a**), (hydroxy(phenyl)methyl)diphenylphosphine oxide (**3b**), (4-bromophenyl)(hydroxy)methyl)diphenylphosphine oxide (**3e**), (hydroxy(3-nitrophenyl)methyl)diphenylphosphine oxide (**3g**), (hydroxy(4-methoxy)methyl)diphenylphosphine oxide (**3i**), (furan-2-yl)(hydroxy)methyl)diphenylphosphine oxide (**3k**), (hydroxy(thiophen-2-yl)methyl)diphenylphosphine oxide (**3l**), (cyclohexyl)(hydroxy)methyl)diphenylphosphine oxide (**3o**):

$$\% \text{ Energy saved} = \frac{73440 \frac{\text{MJ}}{\text{Kg}} - 8100 \frac{\text{MJ}}{\text{Kg}}}{73440 \frac{\text{MJ}}{\text{Kg}}} \times 100$$

$$\% \text{ Energy saved} = 88.9 \% \text{ (each compound)}$$

% Energy saved for the synthesis of (4-chlorophenyl)(hydroxy)methyl)diphenylphosphine oxide (**3c**):

$$\% \text{ Energy saved} = \frac{14400 \frac{\text{MJ}}{\text{Kg}} - 8100 \frac{\text{MJ}}{\text{Kg}}}{14400 \frac{\text{MJ}}{\text{Kg}}} \times 100$$

$$\% \text{ Energy saved} = 43.7 \%$$

*% Energy saved for the synthesis of (hydroxy(4-nitrophenyl)methyl)diphenylphosphine oxide (3f):*

$$\% \text{ Energy saved} = \frac{327456 \frac{\text{MJ}}{\text{Kg}} - 8100 \frac{\text{MJ}}{\text{Kg}}}{327456 \frac{\text{MJ}}{\text{Kg}}} \times 100$$

$$\% \text{Energy saved} = 97.5 \%$$

*% Energy saved for the synthesis of (hydroxy(4-hydroxy)methyl)diphenylphosphine oxide (3h):*

$$\% \text{ Energy saved} = \frac{347904 \frac{\text{MJ}}{\text{Kg}} - 8100 \frac{\text{MJ}}{\text{Kg}}}{96640 \frac{\text{MJ}}{\text{Kg}}} \times 100$$

$$\% \text{Energy saved} = 97.7 \%$$

*% Energy saved for the synthesis of (hydroxy(2-methoxy)methyl)diphenylphosphine oxide (3j):*

$$\% \text{ Energy saved} = \frac{439200 \frac{\text{MJ}}{\text{Kg}} - 43200 \frac{\text{MJ}}{\text{Kg}}}{691200 \frac{\text{MJ}}{\text{Kg}}} \times 100$$

$$\% \text{Energy saved} = 98.15 \%$$

### VI.3.-. Process mass intensity (PMI)

#### Mechanosynthesis

##### General formula used for compounds 3a,3e-3h,3j

$$PMI = \frac{\text{diphenylphosphine oxide} + \text{aldehyde (2a,2e - 2h,2j)}}{\text{total product}}$$

##### General formula used for compounds 3b - 3d,3i,3k - 3l,3o

$$PMI = \frac{\text{diphenylphosphine oxide} + \text{aldehyde (2b - 2d,2i, 2k - 2l,2o)} + \text{sodium chloride}}{\text{total product}}$$

Mechanosynthesis of (4-chlorophenyl)(hydroxy)methyl)diphenylphosphine oxide (3a):

##### Formula used:

$$PMI = \frac{\text{diphenylphosphine oxide} + 4\text{-chlorobenzaldehyde (2a)}}{\text{total product}}$$

$$PMI = \frac{0.101 + 0.0702}{0.144}$$

$$PMI = 1.19$$

Mechanosynthesis of (hydroxy(phenyl)methyl)diphenylphosphine oxide (3b):

##### Formula used:

$$PMI = \frac{\text{diphenylphosphine oxide} + \text{benzene (2b)} + \text{NaCl}}{\text{total product}}$$

$$PMI = \frac{0.101 + 0.0391 + 0.174}{0.143}$$

$$PMI = 2.19$$

Mechanosynthesis of ((3-chlorophenyl)(hydroxy)diphenylphosphine oxide (3c):

##### Formula used:

$$PMI = \frac{\text{diphenylphosphine oxide} + 3\text{-chlorobenzaldehyde (2c)} + \text{NaCl}}{\text{total product}}$$

$$PMI = \frac{0.101 + 0.0702 + 0.174}{0.144}$$

$$PMI = 2.39$$

Mechanosynthesis of (2-chlorophenyl)(hydroxy)methyl)diphenylphosphine oxide (3d):

##### Formula used:

$$PMI = \frac{\text{diphenylphosphine oxide} + 2\text{-chlorobenzaldehyde (2d)} + \text{NaCl}}{\text{total product}}$$

$$PMI = \frac{0.101 + 0.0702 + 0.174}{0.144}$$

$$PMI = 2.39$$

Mechanosynthesis of (4-bromophenyl)(hydroxy)methyl)diphenylphosphine oxide (3e):

**Formula used:**

$$PMI = \frac{\text{diphenylphosphine oxide} + 4\text{-bromobenzaldehyde (2e)}}{\text{total product}}$$

$$PMI = \frac{0.101 + 0.0925}{0.156}$$

$$PMI = 1.24$$

Mechanosynthesis of (hydroxy(4-nitrophenyl)methyl)diphenylphosphine oxide (3f):

**Formula used:**

$$PMI = \frac{\text{diphenylphosphine oxide} + 4\text{-nitrobenzaldehyde (2f)} + \text{NaCl}}{\text{total product}}$$

$$PMI = \frac{0.101 + 0.0756}{0.145}$$

$$PMI = 1.21$$

Mechanosynthesis of (hydroxy(3-nitrophenyl)methyl)diphenylphosphine oxide (3g):

**Formula used:**

$$PMI = \frac{\text{diphenylphosphine oxide} + 3\text{-nitrobenzaldehyde (2g)} + \text{NaCl}}{\text{total product}}$$

$$PMI = \frac{0.101 + 0.0756}{0.169}$$

$$PMI = 1.04$$

Mechanosynthesis of (hydroxy(4-hydroxy)methyl)diphenylphosphine oxide (3h):

**Formula used:**

$$PMI = \frac{\text{diphenylphosphine oxide} + 4\text{-hydroxybenzaldehyde (2h)} + \text{NaCl}}{\text{total product}}$$

$$PMI = \frac{0.101 + 0.0611 + 0.174}{0.148}$$

$$PMI = 2.27$$

Mechanosynthesis of (hydroxy(4-methoxy)methyl)diphenylphosphine oxide (3i):

**Formula used:**

$$PMI = \frac{\text{diphenylphosphine oxide} + 4\text{-methoxybenzaldehyde (2i)} + \text{NaCl}}{\text{total product}}$$

$$PMI = \frac{0.101 + 0.0680 + 0.174}{0.189}$$

$$PMI = 1.81$$

Mechanosynthesis of (hydroxy(2-methoxy)methyl)diphenylphosphine oxide (3j):

**Formula used:**

$$PMI = \frac{\text{diphenylphosphine oxide} + 2\text{-methoxybenzaldehyde (2j)} + \text{NaCl}}{\text{total product}}$$

$$PMI = \frac{0.101 + 0.0680 + 0.174}{0.160}$$

$$PMI = 2.14$$

Mechanosynthesis of (furan-2-yl(hydroxy)methyl)diphenylphosphine oxide (3k):

**Formula used:**

$$PMI = \frac{\text{diphenylphosphine oxide} + \text{furan (2k)} + \text{NaCl}}{\text{total product}}$$

$$PMI = \frac{0.101 + 0.0340 + 0.174}{0.141}$$

$$PMI = 2.19$$

Mechanosynthesis of (hydroxy(thiophen-2-yl)methyl)diphenylphosphine oxide (3l):

$$PMI = \frac{\text{diphenylphosphine oxide} + \text{thiophene (2l)} + \text{NaCl}}{\text{total product}}$$

$$PMI = \frac{0.101 + 0.0421 + 0.174}{0.151}$$

$$PMI = 2.10$$

Mechanosynthesis of (cyclohexyl(hydroxy)methyl)diphenylphosphine oxide (3o):

$$PMI = \frac{\text{diphenylphosphine oxide} + \text{cyclohexane (2o)} + \text{NaCl}}{\text{total product}}$$

$$PMI = \frac{0.101 + 0.0421 + 0.174}{0.137}$$

$$PMI = 2.31$$

**Electrochemistry, Deep Eutectic Solvent (DES) and conventional solution-based method**

**General formula used for compounds 3a-3b,3d-3e,3g,3i,3k,3l,3o obtained by electrochemically oxidative synthesis\***

$$PMI = \frac{\text{diphenylphosphine oxide} + \text{aldehyde (2a - 2b,2d - 2e,2g,2i,2k,2l,2o)} + \text{MeCN} + \text{Dioxane}}{\text{total product}}$$

**General formula used for compounds 3c**

$$PMI = \frac{\text{diphenylphosphine oxide} + \text{aldehyde (2c)} + n - \text{BuLi} + \text{hexane} + \text{coline chloride}}{\text{total product}}$$

**General formula used for compounds 3f,3h,3j\*\***

$$PMI = \frac{\text{diphenylphosphine oxide} + \text{aldehyde (2f,2h,2j)} + \text{THF}}{\text{total product}}$$

**\*The crude product was purified by column chromatography (petroleum ether/ethyl acetate = 2/1, v/v).**

**\*\*The crude product was purified by recrystallization (THF-Methanol).**

Electrochemically oxidative synthesis of (4-chlorophenyl)(hydroxy)methyl)diphenylphosphine oxide (3a)\*:

**Formula used:**

$$PMI = \frac{\text{diphenylphosphine oxide} + 4 - \text{chlorobenzaldehyde (1a)} + \text{MeCN} + \text{Dioxane}}{\text{total product}}$$

$$PMI = \frac{0.101 + 0.758 + 1.18 + 1.55}{0.063}$$

$$PMI = 56.94$$

Electrochemically oxidative synthesis of (hydroxy(phenyl)methyl)diphenylphosphine oxide (3b)\*:

**Formula used:**

$$PMI = \frac{\text{diphenylphosphine oxide} + \text{benzene (2b)} + \text{MeCN} + \text{Dioxane}}{\text{total product}}$$

$$PMI = \frac{0.101 + 0.2929 + 1.18 + 1.55}{0.120}$$

$$PMI = 25.03$$

Deep Eutectic Solvent (DES) synthesis of (3-chlorophenyl)(hydroxy)methyl)diphenylphosphine oxide (3c):

$$PMI = \frac{\text{diphenylphosphine oxide} + 3 - \text{chlorobenzaldehyde (2c)} + n - \text{BuLi} + \text{hexane} + \text{coline chloride}}{\text{total product}}$$

$$PMI = \frac{0.302 + 0.228 + 0.104 + 0.423 + 0.226}{0.501}$$

$$PMI = 2.56$$

Electrochemically oxidative synthesis of (2-chlorophenyl)(hydroxy)methyl)diphenylphosphine oxide (3d)\*:

**Formula used:**

$$PMI = \frac{\text{diphenylphosphine oxide} + 2\text{-chlorobenzaldehyde (2d)} + \text{MeCN} + \text{Dioxane}}{\text{total product}}$$

$$PMI = \frac{0.101 + 0.758 + 1.18 + 1.55}{0.0340}$$

$$PMI = 105.6$$

Electrochemically oxidative synthesis of (4-bromophenyl)(hydroxy)methyl)diphenylphosphine oxide (3e)\*:

**Formula used:**

$$PMI = \frac{\text{diphenylphosphine oxide} + 4\text{-bromobenzaldehyde (2e)} + \text{MeCN} + \text{Dioxane}}{\text{total product}}$$

$$PMI = \frac{0.101 + 0.694 + 1.18 + 1.55}{0.054}$$

$$PMI = 65.3$$

Conventional solution synthesis of (hydroxy(4-nitrophenyl)hydroxy)methyl)diphenylphosphine oxide (3f)\*\*:

**Formula used:**

$$PMI = \frac{\text{diphenylphosphine oxide} + 4\text{-nitrobenzaldehyde (2f)} + \text{THF}}{\text{total product}}$$

$$PMI = \frac{1.01 + 0.756 + 17.76}{1.17}$$

$$PMI = 16.7$$

Electrochemically oxidative synthesis of (Hydroxy(3-nitrophenyl)methyl)diphenylphosphine Oxide (3g)\*:

**Formula used:**

$$PMI = \frac{\text{diphenylphosphine oxide} + 3\text{-nitrobenzaldehyde (2g)} + \text{MeCN} + \text{Dioxane}}{\text{total product}}$$

$$PMI = \frac{0.101 + 0.5667 + 1.18 + 1.55}{0.071}$$

$$PMI = 47.86$$

Conventional solution synthesis of (hydroxy(4-hydroxy)methyl)diphenylphosphine oxide (3h)\*\*:

**Formula used:**

$$PMI = \frac{\text{diphenylphosphine oxide} + 4\text{-hydroxybenzaldehyde (2h)} + \text{THF}}{\text{total product}}$$

$$PMI = \frac{1.01 + 0.6106 + 17.76}{1.542}$$

$$PMI = 12.56$$

Electrochemically oxidative synthesis of *(Hydroxy(4-methoxy)methyl)diphenylphosphine Oxide (3i)\**:

**Formula used:**

$$PMI = \frac{\text{diphenylphosphine oxide} + 4\text{-methoxybenzaldehyde (2i)} + \text{MeCN} + \text{Dioxane}}{\text{total product}}$$

$$PMI = \frac{0.101 + 0.511 + 1.18 + 1.55}{0.291}$$

$$PMI = 11.5$$

Conventional solution synthesis of *(hydroxy(2-methoxy)methyl)diphenylphosphine oxide (3j)\*\**:

**Formula used:**

$$PMI = \frac{\text{diphenylphosphine oxide} + 2\text{-methoxybenzaldehyde (2j)} + \text{THF}}{\text{total product}}$$

$$PMI = \frac{1.01 + 0.6808 + 17.76}{1.692}$$

$$PMI = 11.5$$

Electrochemically oxidative synthesis of *(furan-2-yl(hydroxy)methyl)diphenylphosphine oxide (3k)\**:

**Formula used:**

$$PMI = \frac{\text{diphenylphosphine oxide} + \text{furan (2k)} + \text{MeCN} + \text{Dioxane}}{\text{total product}}$$

$$PMI = \frac{0.101 + 0.2552 + 1.18 + 1.55}{0.064}$$

$$PMI = 48.2$$

Electrochemically oxidative synthesis of *(hydroxy(thiophen-2-yl)methyl)diphenylphosphine oxide (3l)\**:

**Formula used:**

$$PMI = \frac{\text{diphenylphosphine oxide} + \text{thiophene (2l)} + \text{MeCN} + \text{Dioxane}}{\text{total product}}$$

$$PMI = \frac{0.101 + 0.3156 + 1.18 + 1.55}{0.072}$$

$$PMI = 43.7$$

Electrochemically oxidative synthesis of *(cyclohexyl(hydroxy)methyl)diphenylphosphine oxide (3o)\**:

**Formula used:**

$$PMI = \frac{\text{diphenylphosphine oxide} + \text{cyclohexane (2o)} + \text{MeCN} + \text{Dioxane}}{\text{total product}}$$

$$PMI = \frac{0.101 + 0.3156 + 1.18 + 1.55}{0.049}$$

$$PMI = 64.2$$

#### VI.4.- Generalized reaction mass efficiency (RME)

##### Mechanosynthesis

##### General formula used for compounds 3a,3e-3h,3j

$$RME = \frac{\text{total product}}{\text{diphenylphosphine oxide} + \text{aldehyde (2a,2e - 2h,2j)}} \times 100$$

##### General formula used for compounds 3b - 3d,3i, 3k - 3l,3o

$$RME = \frac{\text{total product}}{\text{diphenylphosphine oxide} + \text{aldehyde (2b - 2d,2i,2k - 2l,2o)} + \text{sodium chloride}} \times 100$$

Mechanosynthesis of (4-chlorophenyl)(hydroxy)methyl)diphenylphosphine oxide (**3a**):

##### Formula used:

$$RME = \frac{\text{total product}}{\text{diphenylphosphine oxide} + 4\text{-chlorobenzaldehyde (2a)}} \times 100$$

$$RME = \frac{0.144}{0.101 + 0.0702} \times 100$$

$$RME = 84.1 \%$$

Mechanosynthesis of (hydroxy(phenyl)methyl)diphenylphosphine oxide (**3b**):

##### Formula used:

$$RME = \frac{\text{total product}}{\text{diphenylphosphine oxide} + \text{benzene (2b)} + \text{NaCl}} \times 100$$

$$RME = \frac{0.143}{0.101 + 0.0391 + 0.174} \times 100$$

$$RME = 45.6 \%$$

Mechanosynthesis of ((3-chlorophenyl)(hydroxy)diphenylphosphine oxide (**3c**):

##### Formula used:

$$RME = \frac{\text{total product}}{\text{diphenylphosphine oxide} + 3\text{-chlorobenzaldehyde (2c)} + \text{NaCl}} \times 100$$

$$RME = \frac{0.144}{0.101 + 0.0702 + 0.174} \times 100$$

$$RME = 41.8 \%$$

Mechanosynthesis of (2-chlorophenyl)(hydroxy)methyl)diphenylphosphine oxide (**3d**):

**Formula used:**

$$RME = \frac{\text{total product}}{\text{diphenylphosphine oxide} + 2\text{-chlorobenzaldehyde (2d)} + \text{NaCl}} \times 100$$

$$RME = \frac{0.144}{0.101 + 0.0702 + 0.174} \times 100$$

$$RME = 41.8 \%$$

Mechanosynthesis of (4-bromophenyl)(hydroxy)methyl)diphenylphosphine oxide (**3e**):

**Formula used:**

$$RME = \frac{\text{total product}}{\text{diphenylphosphine oxide} + 4\text{-bromobenzaldehyde (2e)}} \times 100$$

$$RME = \frac{0.156}{0.101 + 0.0925} \times 100$$

$$RME = 80.6 \%$$

Mechanosynthesis of (hydroxy(4-nitrophenyl)methyl)diphenylphosphine oxide (**3f**):

**Formula used:**

$$RME = \frac{\text{total product}}{\text{diphenylphosphine oxide} + 4\text{-nitrobenzaldehyde (2f)}} \times 100$$

$$RME = \frac{0.145}{0.101 + 0.0756} \times 100$$

$$RME = 82.6 \%$$

Mechanosynthesis of (hydroxy(3-nitrophenyl)methyl)diphenylphosphine oxide (**3g**):

**Formula used:**

$$RME = \frac{\text{total product}}{\text{diphenylphosphine oxide} + 3\text{-nitrobenzaldehyde (2g)}} \times 100$$

$$RME = \frac{0.169}{0.101 + 0.0756} \times 100$$

$$RME = 96.2 \%$$

Mechanosynthesis of (hydroxy(4-hydroxy)methyl)diphenylphosphine oxide (**3h**):

**Formula used:**

$$RME = \frac{\text{total product}}{\text{diphenylphosphine oxide} + 4\text{-hydroxybenzaldehyde (2h)}} \times 100$$

$$RME = \frac{0.148}{0.101 + 0.0611 + 0.174} \times 100$$

$$RME = 44.1 \%$$

Mechanosynthesis of (hydroxy(4-methoxy)methyl)diphenylphosphine oxide (3i):

**Formula used:**

$$RME = \frac{\text{total product}}{\text{diphenylphosphine oxide} + 4\text{-methoxybenzaldehyde (2i)} + \text{NaCl}} \times 100$$

$$RME = \frac{0.189}{0.101 + 0.0680 + 0.174} \times 100$$

$$RME = 55.2 \%$$

Mechanosynthesis of (hydroxy(2-methoxy)methyl)diphenylphosphine oxide (3j):

**Formula used:**

$$RME = \frac{\text{total product}}{\text{diphenylphosphine oxide} + 2\text{-methoxybenzaldehyde (2j)} + \text{NaCl}} \times 100$$

$$RME = \frac{0.160}{0.101 + 0.0680 + 0.174} \times 100$$

$$RME = 46.7 \%$$

Mechanosynthesis of (furan-2-yl(hydroxy)methyl)diphenylphosphine oxide (3k):

**Formula used:**

$$RME = \frac{\text{total product}}{\text{diphenylphosphine oxide} + \text{furan (2k)} + \text{NaCl}} \times 100$$

$$RME = \frac{0.141}{0.101 + 0.0340 + 0.174} \times 100$$

$$RME = 45.7 \%$$

Mechanosynthesis of (hydroxy(thiophen-2-yl)methyl)diphenylphosphine oxide (3l):

**Formula used:**

$$RME = \frac{\text{total product}}{\text{diphenylphosphine oxide} + \text{thiophene (2l)} + \text{NaCl}} \times 100$$

$$RME = \frac{0.151}{0.101 + 0.0421 + 0.174} \times 100$$

$$RME = 47.6 \%$$

Mechanosynthesis of (cyclohexyl(hydroxy)methyl)diphenylphosphine oxide (**3o**):

**Formula used:**

$$RME = \frac{\text{total product}}{\text{diphenylphosphine oxide} + \text{cyclohexane (2o)} + \text{NaCl}} \times 100$$

$$RME = \frac{0.137}{0.101 + 0.0421 + 0.174} \times 100$$

$$RME = 43.3 \%$$

### **Electrochemistry, Deep Eutectic Solvent (DES) and conventional solution-based method**

**General formula used for compounds 3a-3b,3d-3e,3g,3i,3k,3l,3o obtained by electrochemically oxidative synthesis\***

$$RME = \frac{\text{total product}}{\text{diphenylphosphine oxide} + \text{aldehyde (2a - 2b,2d - 2e,2g,2i,2k,2l,2o)} + \text{MeCN} + \text{Dioxane}} \times 100$$

**General formula used for compounds 3c**

$$RME = \frac{\text{total product}}{\text{iphenylphosphine oxide} + \text{aldehyde (2c)} + n - \text{BuLi} + \text{hexane} + \text{coline chloride} - \text{total product}} \times 100$$

**General formula used for compounds 3f,3h,3j\*\***

$$RME = \frac{\text{total product}}{\text{diphenylphosphine oxide} + \text{aldehyde (2f,2h,2j)} + \text{THF}} \times 100$$

\*The crude product was purified by column chromatography (petroleum ether/ethyl acetate = 2/1, v/v).

\*\*The crude product was purified by recrystallization (THF-Methanol).

Electrochemically oxidative synthesis of (4-chlorophenyl)(hydroxy)methyl)diphenylphosphine oxide (**3a**):

**Formula used:**

$$RME = \frac{\text{total product}}{\text{diphenylphosphine oxide} + 4 - \text{chlorobenzaldehyde (1a)} + \text{MeCN} + \text{Dioxane}} \times 100$$

$$RME = \frac{0.063}{0.101 + 0.758 + 1.18 + 1.55} \times 100$$

$$RME = 1.75 \%$$

Electrochemically oxidative synthesis of (hydroxy(phenyl)methyl)diphenylphosphine oxide (**3b**):

**Formula used:**

$$RME = \frac{\text{total product}}{\text{diphenylphosphine oxide} + \text{benzene (2b)} + \text{MeCN} + \text{Dioxane}} \times 100$$

$$RME = \frac{0.120}{0.101 + 0.2929 + 1.18 + 1.55} \times 100$$

$$RME = 4.00 \%$$

Deep Eutectic Solvent (DES) synthesis of (3-chlorophenyl)(hydroxy)methyl)diphenylphosphine oxide (3c):

$$RME = \frac{\text{total product}}{\text{diphenylphosphine oxide} + 3\text{-chlorobenzaldehyde(2c)} + n\text{-BuLi} + \text{hexane} + \text{collidine}}$$

$$RME = \frac{0.501}{0.302 + 0.228 + 0.104 + 0.423 + 0.226} \times 100$$

$$RME = 39.1 \%$$

Electrochemically oxidative synthesis of (2-chlorophenyl)(hydroxy)methyl)diphenylphosphine oxide (3d)\*:

**Formula used:**

$$RME = \frac{\text{total product}}{\text{diphenylphosphine oxide} + 2\text{-chlorobenzaldehyde (2d)} + \text{MeCN} + \text{Dioxane}} \times 100$$

$$RME = \frac{0.0340}{0.101 + 0.758 + 1.18 + 1.55} \times 100$$

$$RME = 0.947 \%$$

Electrochemically oxidative synthesis of (4-bromophenyl)(hydroxy)methyl)diphenylphosphine oxide (3e)\*:

**Formula used:**

$$RME = \frac{\text{total product}}{\text{diphenylphosphine oxide} + 4\text{-bromobenzaldehyde (2e)} + \text{MeCN} + \text{Dioxane}} \times 100$$

$$RME = \frac{0.054}{0.101 + 0.694 + 1.18 + 1.55} \times 100$$

$$RME = 1.53 \%$$

Conventional solution synthesis of (hydroxy(4-nitrophenyl)hydroxy)methyl)diphenylphosphine oxide (3f)\*\*:

**Formula used:**

$$RME = \frac{\text{total product}}{\text{diphenylphosphine oxide} + 4\text{-nitrobenzaldehyde (2f)} + \text{THF}} \times 100$$

$$RME = \frac{1.17}{1.01 + 0.756 + 17.76} \times 100$$

$$RME = 5.98 \%$$

Electrochemically oxidative synthesis of *(Hydroxy(3-nitrophenyl)methyl)diphenylphosphine Oxide (3g)\**:

**Formula used:**

$$RME = \frac{\text{total product}}{\text{diphenylphosphine oxide} + 3\text{-nitrobenzaldehyde (2g)} + \text{MeCN} + \text{Dioxane}} \times 100$$

$$RME = \frac{0.071}{0.101 + 0.5667 + 1.18 + 1.55} \times 100$$

$$RME = 2.09 \%$$

Conventional solution synthesis of *(hydroxy(4-hydroxy)methyl)diphenylphosphine oxide (3h)\*\**:

**Formula used:**

$$RME = \frac{\text{total product}}{\text{diphenylphosphine oxide} + 4\text{-hydroxibenzaldehyde (2h)} + \text{THF}} \times 100$$

$$RME = \frac{1.542}{1.01 + 0.6106 + 17.76} \times 100$$

$$RME = 7.96 \%$$

Electrochemically oxidative synthesis of *(Hydroxy(4-methoxy)methyl)diphenylphosphine Oxide (3i)\**:

**Formula used:**

$$RME = \frac{\text{total product}}{\text{diphenylphosphine oxide} + 4\text{-methoxybenzaldehyde (2i)} + \text{MeCN} + \text{Dioxane}} \times 100$$

$$RME = \frac{0.291}{0.101 + 0.511 + 1.18 + 1.55} \times 100$$

$$RME = 8.69 \%$$

Conventional solution synthesis of *(hydroxy(2-methoxy)methyl)diphenylphosphine oxide (3j)\*\**:

**Formula used:**

$$RME = \frac{\text{total product}}{\text{diphenylphosphine oxide} + 2\text{-methoxybenzaldehyde (2j)} + \text{THF}} \times 100$$

$$RME = \frac{1.692}{1.01 + 0.6808 + 17.76} \times 100$$

$$RME = 8.69 \%$$

Electrochemically oxidative synthesis of *(furan-2-yl(hydroxy)methyl)diphenylphosphine oxide (3k)\**:

**Formula used:**

$$RME = \frac{\text{total product}}{\text{diphenylphosphine oxide} + \text{furan (2k)} + \text{MeCN} + \text{Dioxane}} \times 100$$

$$RME = \frac{0.064}{0.101 + 0.2552 + 1.18 + 1.55} \times 100$$

$$RME = 2.07$$

Electrochemically oxidative synthesis of *(hydroxy(thiophen-2-yl)methyl)diphenylphosphine oxide (3l)\**:

**Formula used:**

$$RME = \frac{\text{total product}}{\text{diphenylphosphine oxide} + \text{thiophene (2l)} + \text{MeCN} + \text{Dioxane}} \times 100$$

$$RME = \frac{0.072}{0.101 + 0.3156 + 1.18 + 1.55} \times 100$$

$$RME = 2.29 \%$$

Electrochemically oxidative synthesis of *(cyclohexyl(hydroxy)methyl)diphenylphosphine oxide (3o)\**:

**Formula used:**

$$RME = \frac{\text{total product}}{\text{diphenylphosphine oxide} + \text{cyclohexane (2n)} + \text{MeCN} + \text{Dioxane}} \times 100$$

$$RME = \frac{0.049}{0.101 + 0.3156 + 1.18 + 1.55} \times 100$$

$$RME = 1.56 \%$$

## VI.5.-. Real atom economy (RAE)

### Mechanosynthesis

#### General formula used for compounds 3a,3e-3h,3j

$$RAE = \frac{\text{Weight total product}}{\text{Weight (diphenylphosphine oxide} + \text{aldehyde (2a,2e - 2h,2j))}} \times 100$$

#### General formula used for compounds 3b - 3d,3i,3k - 3l,3o

$$RAE = \frac{\text{Weight of the desired product}}{\text{Weight (diphenylphosphine oxide} + \text{aldehyde (2b - 2d,2i,2k - 2l,2o)} + \text{sodium chloride)}} \times 100$$

Mechanosynthesis of *(4-chlorophenyl)(hydroxy)methyl)diphenylphosphine oxide (3a)*:

**Formula used:**

$$RAE = \frac{\text{Weight total product}}{\text{Weight (diphenylphosphine oxide} + \text{4 - chlorobenzaldehyde (1a))}} \times 100$$

$$RAE = \frac{342.06 * 0.85}{202.19 + 140.57} \times 100$$

$$RAE = 85.0 \%$$

*Mechanosynthesis of (hydroxy(phenyl)methyl)diphenylphosphine oxide (3b):*

**Formula used:**

$$RAE = \frac{\text{Weight total product}}{\text{Weight (diphenylphosphine oxide + benzene (2b) + NaCl)}} \times 100$$

$$RAE = \frac{308.32 * 0.93}{202.19 + 78.11 + 55.44} \times 100$$

$$RAE = 85.4 \%$$

*Mechanosynthesis of ((3-chlorophenyl)(hydroxy)diphenylphosphine oxide (3c):*

**Formula used:**

$$RAE = \frac{\text{Weight total product}}{\text{Weight (diphenylphosphine oxide + 3 - chlorobenzaldehyde (2c) + NaCl)}} \times 100$$

$$RAE = \frac{329.74 * 0.84}{202.19 + 140.6 + 55.44} \times 100$$

$$RAE = 69.6 \%$$

*Mechanosynthesis of (2-chlorophenyl)(hydroxy)methyl)diphenylphosphine oxide (3d):*

**Formula used:**

$$RAE = \frac{\text{Weight total product}}{\text{Weight (diphenylphosphine oxide + 2 - chlorobenzaldehyde (2d) + NaCl)}} \times 100$$

$$RAE = \frac{329.74 * 0.85}{202.19 + 140.6 + 55.44} \times 100$$

$$RAE = 70.4 \%$$

*Mechanosynthesis of (4-bromophenyl)(hydroxy)methyl)diphenylphosphine oxide (3e):*

**Formula used:**

$$RAE = \frac{\text{Weight total product}}{\text{Weight (diphenylphosphine oxide + 4 - bromobenzaldehyde (2e))}} \times 100$$

$$RAE = \frac{387.21 * 0.81}{202.19 + 185.03} \times 100$$

$$RAE = 81.0 \%$$

*Mechanosynthesis of (hydroxy(4-nitrophenyl)methyl)diphenylphosphine oxide (3f):*

**Formula used:**

$$RAE = \frac{\text{Weight total product}}{\text{Weight (diphenylphosphine oxide + 4 - nitrobenzaldehyde (2f))}} \times 100$$

$$RAE = \frac{353.32 * 0.78}{202.19 + 151.12} \times 100$$

$$RAE = 78.0 \%$$

*Mechanosynthesis of (hydroxy(3-nitrophenyl)methyl)diphenylphosphine oxide (3g):*

**Formula used:**

$$RAE = \frac{\text{Weight total product}}{\text{Weight (diphenylphosphine oxide + 3 - nitrobenzaldehyde (2g))}} \times 100$$

$$RAE = \frac{353.31 * 0.91}{202.19 + 151.12} \times 100$$

$$RAE = 91.0 \%$$

*Mechanosynthesis of (hydroxy(4-hydroxy)methyl)diphenylphosphine oxide (3h)*

**Formula used:**

$$RAE = \frac{\text{Weight total product}}{\text{Weight (diphenylphosphine oxide + 4 - hydroxybenzaldehyde (2h) + NaCl)}} \times 100$$

$$RAE = \frac{324.32 * 0.88}{202.19 + 122.12 + 55.44} \times 100$$

$$RAE = 75.2 \%$$

*Mechanosynthesis of (hydroxy(4-methoxy)methyl)diphenylphosphine oxide (3i):*

**Formula used:**

$$RAE = \frac{\text{Weight total product}}{\text{Weight (diphenylphosphine oxide + 4 - methoxybenzaldehyde (2i) + NaCl)}} \times 100$$

$$RAE = \frac{338.34 * 0.77}{202.19 + 136.15 + 55.44} \times 100$$

$$RAE = 66.2 \%$$

*Mechanosynthesis of (hydroxy(2-methoxy)methyl)diphenylphosphine oxide (3j):*

$$RAE = \frac{\text{Weight total product}}{\text{Weight (diphenylphosphine oxide + 2 - methoxybenzaldehyde (2j) + NaCl)}} \times 100$$

$$RAE = \frac{338.34 * 0.91}{202.19 + 136.15 + 55.44} \times 100$$

$$RAE = 78.2 \%$$

*Mechanosynthesis of (furan-2-yl(hydroxy)methyl)diphenylphosphine oxide (3k):*

$$RAE = \frac{\text{Weight total product}}{\text{Weight (diphenylphosphine oxide + furan (2k) + NaCl)}} \times 100$$

$$RAE = \frac{292.28 * 0.95}{202.19 + 66.07 + 55.44} \times 100$$

$$RAE = 85.8 \%$$

*Mechanosynthesis of (hydroxy(thiophen-2-yl)methyl)diphenylphosphine oxide (3l):*

$$RAE = \frac{\text{Weight total product}}{\text{Weight (diphenylphosphine oxide + thiophene (2l) + NaCl)}} \times 100$$

$$RAE = \frac{314.34 * 0.94}{202.19 + 84.14 + 55.44} \times 100$$

$$RAE = 86.5 \%$$

*Mechanosynthesis of (cyclohexyl(hydroxy)methyl)diphenylphosphine oxide (3o):*

$$RAE = \frac{\text{Weight total product}}{\text{Weight (diphenylphosphine oxide + cyclohexane (2o) + NaCl)}} \times 100$$

$$RAE = \frac{314.36 * 0.92}{202.19 + 84.16 + 55.44} \times 100$$

$$RAE = 84.6 \%$$

***Electrochemistry, Deep Eutectic Solvent (DES) and conventional solution-based method***

***General formula used for compounds 3a-3b,3d-3e,3g,3i,3k,3l,3o obtained by electrochemically oxidative synthesis\****

$$RAE = \frac{\text{Weight total product}}{\text{Weight (diphenylphosphine oxide + aldehyde (2a - 2b,2d - 2e,2g,2i,2k,2l,2o) + MeCN + Dioxane)}} \times 100$$

**General formula used for compounds 3c**

$$RAE = \frac{\text{Weight total product}}{\text{Weight (diphenylphosphine oxide + aldehyde (2c) + n - BuLi + hexane + coline chloride)}} \times 100$$

**General formula used for compounds 3f,3h,3j\*\***

$$RAE = \frac{\text{Weight total product}}{\text{Weight (diphenylphosphine oxide + aldehyde (2f,2h,2j) + THF)}} \times 100$$

\*The crude product was purified by column chromatography (petroleum ether/ethyl acetate = 2/1, v/v).

\*\*The crude product was purified by recrystallization (THF-Methanol).

Electrochemically oxidative synthesis of (4-chlorophenyl)(hydroxy)methyl)diphenylphosphine oxide (**3a**):

**Formula used:**

$$RAE = \frac{\text{Weight total product}}{\text{Weight (diphenylphosphine oxide + 4 - chlorobenzaldehyde (1a) + MeCN + Dioxane)}} \times 100$$

$$RAE = \frac{342.06 * 0.37}{202.19 + 140.57 + 41.05 + 88.11} \times 100$$

$$RAE = 27.8 \%$$

Electrochemically oxidative synthesis of (hydroxy(phenyl)methyl)diphenylphosphine oxide (**3b**):

**Formula used:**

$$RAE = \frac{\text{Weight total product}}{\text{Weight (diphenylphosphine oxide + benzene (2b) + MeCN + Dioxane)}} \times 100$$

$$RAE = \frac{308.32 * 0.78}{202.19 + 78.11 + 41.05 + 88.11} \times 100$$

$$RAE = 58.7 \%$$

Deep Eutectic Solvent (DES) synthesis of (3-chlorophenyl)(hydroxy)methyl)diphenylphosphine oxide (**3c**):

$$RAE = \frac{\text{Weight total product}}{\text{Weight (diphenylphosphine oxide + 3 - chlorobenzaldehyde (2c) + n - BuLi + hexane + coline chloride)}} \times 100$$

$$RAE = \frac{329.74 * 0.90}{202.19 + 140.6 + 64.1 + 86.2 + 139.7} \times 100$$

$$RAE = 46.9 \%$$

Electrochemically oxidative synthesis of (2-chlorophenyl)(hydroxy)methyl)diphenylphosphine oxide (**3d**):

**Formula used:**

$$RAE = \frac{\text{Weight total product}}{\text{Weight (diphenylphosphine oxide + 2 - chlorobenzaldehyde (2d) + MeCN + Dioxane)}} \times 100$$

$$RAE = \frac{329.74 * 0.20}{202.19 + 140.6 + 41.05 + 88.11} \times 100$$

$$RAE = 14.0 \%$$

Electrochemically oxidative synthesis of *(4-bromophenyl)(hydroxy)methyl)diphenylphosphine oxide (3e)\**:

**Formula used:**

$$RAE = \frac{\text{Weight total product}}{\text{Weight (diphenylphosphine oxide + 4 - bromobenzaldehyde (2e) + MeCN + Dioxane)}} \times 100$$

$$RAE = \frac{387.21 * 0.28}{202.19 + 185.03 + 41.05 + 88.11} \times 100$$

$$RAE = 21.0 \%$$

Conventional solution synthesis of *(hydroxy(4-nitrophenyl)hydroxy)methyl)diphenylphosphine oxide (3f)\*\**:

**Formula used:**

$$RAE = \frac{\text{Weight total product}}{\text{Weight (diphenylphosphine oxide + 4 - nitrobenzaldehyde (2f) + THF)}} \times 100$$

$$RAE = \frac{353.31 * 0.69}{202.19 + 151.12 + 72.11} \times 100$$

$$RAE = 57.3 \%$$

Electrochemically oxidative synthesis of *(Hydroxy(3-nitrophenyl)methyl)diphenylphosphine Oxide (3g)\**:

$$RAE = \frac{\text{Weight total product}}{\text{Weight (diphenylphosphine oxide + 3 - nitrobenzaldehyde (2g) + MeCN + Dioxane)}} \times 100$$

$$RAE = \frac{353.31 * 0.40}{202.19 + 151.12 + 41.05 + 88.11} \times 100$$

$$RAE = 29.3 \%$$

Conventional solution synthesis of *(hydroxy(4-hydroxy)methyl)diphenylphosphine oxide (3h)\**:

**Formula used:**

$$RAE = \frac{\text{Weight total product}}{\text{Weight (diphenylphosphine oxide + 4 - hydroxibenzaldehyde (2h) + THF)}} \times 100$$

$$RAE = \frac{324.32 * 0.82}{202.19 + 122.12 + 72.11} \times 100$$

$$RAE = 67.1 \%$$

Electrochemically oxidative synthesis of *(Hydroxy(4-methoxy)methyl)diphenylphosphine Oxide (3i)\**:

**Formula used:**

$$RAE = \frac{\text{Weight total product}}{\text{Weight (diphenylphosphine oxide + 4 - methoxybenzaldehyde (2i) + MeCN + Dioxane)}} \times 100$$

$$RAE = \frac{338.34 * 0.30}{202.19 + 136.15 + 72.11} \times 100$$

$$RAE = 24.7 \%$$

Conventional solution synthesis of *(hydroxy(2-methoxy)methyl)diphenylphosphine oxide (3j)\*\**:

**Formula used:**

$$RAE = \frac{\text{Weight total product}}{\text{Weight (diphenylphosphine oxide + 2 - methoxybenzaldehyde (2j) + THF)}} \times 100$$

$$RAE = \frac{338.34 * 0.91}{202.19 + 136.15 + 72.11} \times 100$$

$$RAE = 75.0 \%$$

Electrochemically oxidative synthesis of *(furan-2-yl(hydroxy)methyl)diphenylphosphine oxide (3k)\**:

**Formula used:**

$$RAE = \frac{\text{Weight total product}}{\text{Weight (diphenylphosphine oxide + furan (2k) + MeCN + Dioxane)}} \times 100$$

$$RAE = \frac{298.28 * 0.43}{202.19 + 66.07 + 41.05 + 88.11} \times 100$$

$$RAE = 32.3 \%$$

Electrochemically oxidative synthesis of *(hydroxy(thiophen-2-yl)methyl)diphenylphosphine oxide (3l)\**:

**Formula used:**

$$RAE = \frac{\text{Weight total product}}{\text{Weight (diphenylphosphine oxide + thiophene (2l) + MeCN + Dioxane)}} \times 100$$

$$RAE = \frac{314.34 * 0.46}{202.19 + 84.14 + 41.05 + 88.11} \times 100$$

$$RAE = 34.8 \%$$

Electrochemically oxidative synthesis of *(cyclohexyl(hydroxy)methyl)diphenylphosphine oxide (3o)\**:

**Formula used:**

$$RAE = \frac{\text{Weight total product}}{\text{Weight (diphenylphosphine oxide + cyclohexane (2o) + MeCN + Dioxane)}} \times 100$$

$$RAE = \frac{314.36 * 0.31}{202.19 + 84.16 + 41.05 + 88.11} * 100$$

$$RAE = 23.5 \%$$

## VII.- Cost calculation

**Table SI\_2.** Average Price of Electricity to household and non-household medium size consumer, by European Country, 2021 and 2022 (euro per Kilowatthour) reproduced from (<https://ec.europa.eu/eurostat/databrowser/bookmark/df2fd759-e5cb-4633-a73b-922ffce6bb7a?lang=en>) accessed in January 2024. Note that United Kingdom 2021 values have been reproduced from ([https://www.ukpower.co.uk/home\\_energy/tariffs-per-unit-kwh](https://www.ukpower.co.uk/home_energy/tariffs-per-unit-kwh)) and (<https://www.gov.uk/government/statistical-data-sets/gas-and-electricity-prices-in-the-non-domestic-sector>) to household and non-household respectively. Data use for calculation in Table S3 and S4 are highlighted in yellow.

| Energy indicator                                                  | Medium size household |               | Non-household. medium size consumers |            |
|-------------------------------------------------------------------|-----------------------|---------------|--------------------------------------|------------|
|                                                                   | 2021                  | 2022          | 2021                                 | 2022       |
| <b>TIME</b>                                                       |                       |               |                                      |            |
| <b>GEO (Labels)</b>                                               |                       |               |                                      |            |
| European Union - 27 countries (from 2020)                         | 0.2203                | 0.2525        | 0.0859                               | 0.1604     |
| Euro area - 20 countries (from 2023)                              | :                     | :             | :                                    | :          |
| Euro area - 19 countries (2015-2022)                              | :                     | :             | :                                    | :          |
| Belgium                                                           | 0.2702                | 0.3437        | 0.081                                | 0.1519     |
| Bulgaria                                                          | 0.1024                | 0.1093        | 0.0842                               | 0.2372     |
| Czechia                                                           | 0.1802                | 0.2445        | 0.0739                               | 0.1444     |
| Denmark                                                           | 0.29                  | 0.4559        | 0.0725                               | 0.1595     |
| Germany (until 1990 former territory of the FRG)                  | 0.3193                | 0.3279        | 0.0908                               | 0.1512     |
| Estonia                                                           | 0.1324                | 0.2056        | 0.0834                               | 0.1502     |
| Ireland                                                           | 0.2555                | 0.2324        | 0.1378                               | 0.2104     |
| Greece                                                            | 0.168                 | 0.2101        | 0.089                                | 0.283      |
| Spain                                                             | 0.2323                | 0.3071        | 0.0931                               | 0.1769     |
| France                                                            | 0.1946                | 0.2092        | 0.085                                | 0.1203     |
| Croatia                                                           | 0.1291                | 0.1354        | 0.0881                               | 0.141      |
| Italy                                                             | 0.2259                | 0.2115        | 0.0939                               | 0.2354     |
| Cyprus                                                            | 0.1976                | 0.2607        | 0.1091                               | 0.1722     |
| Latvia                                                            | 0.1403                | 0.1759        | 0.0849                               | 0.1468     |
| Lithuania                                                         | 0.1348                | 0.1497        | 0.0932                               | 0.1758     |
| Luxembourg                                                        | 0.1988                | 0.2017        | 0.0836                               | 0.1230     |
| Hungary                                                           | 0.1003                | 0.0948        | 0.0818                               | 0.1598     |
| Malta                                                             | 0.1285                | 0.1298        | 0.133                                | 0.1332     |
| Netherlands                                                       | 0.1281                | 0.0451        | 0.0721                               | 0.1339     |
| Austria                                                           | 0.2216                | 0.2249        | 0.0884                               | 0.1437     |
| Poland                                                            | 0.1548                | 0.1464        | 0.0731                               | 0.0988     |
| Portugal                                                          | 0.2089                | 0.2199        | 0.0755                               | 0.1351     |
| Romania                                                           | 0.1536                | 0.2362        | 0.0824                               | 0.2149     |
| Slovenia                                                          | 0.1662                | 0.1390        | 0.0757                               | 0.1435     |
| Slovakia                                                          | 0.1668                | 0.1796        | 0.0929                               | 0.1892     |
| Finland                                                           | 0.1767                | 0.1934        | 0.0669                               | 0.0802     |
| Sweden                                                            | 0.2114                | 0.2278        | 0.0705                               | 0.1115     |
| Iceland                                                           | 0.1355                | 0.1530        | 0.0449                               | 0.0732     |
| Liechtenstein                                                     | 0.2071                | 0.2201        | 0.0863                               | 0.1260     |
| Norway                                                            | 0.1826                | 0.1994        | 0.0715                               | 0.1369     |
| Switzerland                                                       | :                     | :             | :                                    | :          |
| United Kingdom                                                    | 0.2407*               | 0.2796*       | 0.1546**                             | 0.2505**   |
| Montenegro                                                        | 0.098                 | 0.0961        | 0.0773                               | 0.0762     |
| North Macedonia                                                   | 0.0841                | 0.094         | 0.0752                               | 0.1685     |
| Albania                                                           | 0.0925 (e)            | 0.0941 (e)    | 0.1039 (e)                           | 0.1057 (e) |
| Serbia                                                            | 0.0791                | 0.0808        | 0.0702                               | 0.0893     |
| Turkey                                                            | 0.0834                | 0.0866        | 0.0648                               | 0.1171     |
| Bosnia and Herzegovina                                            | 0.0875                | 0.0887        | 0.0719                               | 0.0714     |
| Kosovo (under United Nations Security Council Resolution 1244/99) | 0.0605 (e)            | 0.0611 (e)    | 0.0635 (e)                           | 0.0659 (e) |
| Moldova                                                           | 0.0851                | 0.1172        | 0.0633                               | 0.0761     |
| Ukraine                                                           | 0.0485                | :             | 0.0595                               | :          |
| Georgia                                                           | 0.0631                | :             | 0.0713                               | :          |
| <b>Special value</b>                                              |                       |               |                                      |            |
| :                                                                 |                       | not available |                                      |            |
| <b>Available flags:</b>                                           |                       |               |                                      |            |
| e                                                                 |                       | estimated     |                                      |            |
| p                                                                 |                       | provisional   |                                      |            |

\* [https://www.ukpower.co.uk/home\\_energy/tariffs-per-unit-kwh](https://www.ukpower.co.uk/home_energy/tariffs-per-unit-kwh)

\*\* <https://www.gov.uk/government/statistical-data-sets/gas-and-electricity-prices-in-the-non-domestic-sector>

**Table SI\_3.** Average costs calculation in euro to medium size household consumers in euro for the mechanochemical, deep eutectic solvents (DES), electrochemical and conventional solution-based method of 1 kg of the compounds **3a-l,3o**.

| <b>Year</b>              | <b>2021</b>                          | <b>2022</b> | <b>2021</b>                                                            | <b>2022</b> | <b>2021</b>                                              | <b>2022</b> | <b>2021</b>                                              | <b>2022</b> | <b>2021</b>                                              | <b>2022</b> | <b>2021</b>                                            | <b>2022</b> |
|--------------------------|--------------------------------------|-------------|------------------------------------------------------------------------|-------------|----------------------------------------------------------|-------------|----------------------------------------------------------|-------------|----------------------------------------------------------|-------------|--------------------------------------------------------|-------------|
|                          | <b>Mechanosynthesis<br/>3a-3l,3o</b> |             | <b>Electrochemistry<br/>method<br/>3a-3b,3d-<br/>3e,3g,3i,3k,3l,3o</b> |             | <b>Deep Eutectic<br/>Solvent method<br/>(DES)<br/>3c</b> |             | <b>Conventional<br/>solution-based<br/>method<br/>3f</b> |             | <b>Conventional<br/>solution-based<br/>method<br/>3h</b> |             | <b>Conventional<br/>solution-based<br/>method (3j)</b> |             |
| <b>Spain</b>             | 522.7                                | 691.0       | 4738.9                                                                 | 6264.8      | 929.2                                                    | 1228.4      | 21124.2                                                  | 27970.4     | 22449.5                                                  | 29678.1     | 28340.6                                                | 37466.2     |
| <b>Germany</b>           | 718.4                                | 737.8       | 6513.7                                                                 | 6689.2      | 1277.2                                                   | 1311.6      | 29036.7                                                  | 29814.3     | 30857.2                                                  | 31688.3     | 38954.6                                                | 40003.8     |
| <b>France</b>            | 437.9                                | 470.7       | 3969.8                                                                 | 4267.7      | 778.4                                                    | 836.8       | 17692.4                                                  | 19022.3     | 18806.1                                                  | 20217.1     | 23741.2                                                | 25522.4     |
| <b>UK</b>                | 541.6                                | 629.1       | 4910.3                                                                 | 5703.8      | 962.8                                                    | 1118.4      | 21890.5                                                  | 25425.2     | 23261.2                                                  | 27020.5     | 29365.4                                                | 34111.2     |
| <b>Average</b>           | 555.1                                | 632.1       | 5033.2                                                                 | 5731.4      | 986.9                                                    | 1098.8      | 22435.9                                                  | 25557.9     | 23843.5                                                  | 27151.0     | 30100.5                                                | 34275.9     |
| <b>Total<br/>average</b> | 593.6                                |             | 5382.3                                                                 |             | 1042.9                                                   |             | 25557.9                                                  |             | 25497.3                                                  |             | 32188.2                                                |             |

**Table SI\_4.** Average costs calculation to non-household, medium size consumers in euro for the mechanochemical, deep eutectic solvents (DES), electrochemical and conventional solution-based method of 1 kg of the compounds **3a-l,3o**.

| <i>Year</i>              | <b>2021</b>                          | <b>2022</b> | <b>2021</b>                                                            | <b>2022</b> | <b>2021</b>                                              | <b>2022</b> | <b>2021</b>                                              | <b>2022</b> | <b>2021</b>                                              | <b>2022</b> | <b>2021</b>                                              | <b>2022</b> |
|--------------------------|--------------------------------------|-------------|------------------------------------------------------------------------|-------------|----------------------------------------------------------|-------------|----------------------------------------------------------|-------------|----------------------------------------------------------|-------------|----------------------------------------------------------|-------------|
|                          | <b>Mechanosynthesis<br/>3a-3l,3o</b> |             | <b>Electrochemistry<br/>method<br/>3a-3b,3d-<br/>3e,3g,3i,3k,3l,3o</b> |             | <b>Deep Eutectic<br/>Solvent<br/>method (DES)<br/>3c</b> |             | <b>Conventional<br/>solution-based<br/>method<br/>3f</b> |             | <b>Conventional<br/>solution-based<br/>method<br/>3h</b> |             | <b>Conventional<br/>solution-based<br/>method<br/>3j</b> |             |
| <b>Spain</b>             | 209.5                                | 398.0       | 1899.2                                                                 | 3608.8      | 372.4                                                    | 707.6       | 8468.6                                                   | 16096.5     | 8997.2                                                   | 17095.6     | 11358.2                                                  | 21581.8     |
| <b>Germany</b>           | 204.3                                | 340.2       | 1852.3                                                                 | 3084.5      | 363.2                                                    | 604.2       | 8259.2                                                   | 13749.9     | 8774.9                                                   | 14612.0     | 11077.6                                                  | 18446.4     |
| <b>France</b>            | 191.3                                | 270.7       | 1734.0                                                                 | 2454.1      | 340.0                                                    | 481.2       | 7731.6                                                   | 10947.9     | 8214.4                                                   | 11625.8     | 10370.0                                                  | 14676.6     |
| <b>UK</b>                | 347.9                                | 563.6       | 3153.8                                                                 | 5110.2      | 618.4                                                    | 1002.0      | 14060.2                                                  | 22775.0     | 14940.5                                                  | 24208.3     | 18861.2                                                  | 30561.0     |
| <b>Average</b>           | 238.2                                | 393.1       | 2159.9                                                                 | 3564.4      | 423.5                                                    | 698.9       | 9630.9                                                   | 15892.8     | 10231.8                                                  | 16885.4     | 12916.8                                                  | 21316.5     |
| <b>Total<br/>average</b> | 593.6                                |             | 2862.1                                                                 |             | 561.2                                                    |             | 12761.8                                                  |             | 13558.6                                                  |             | 17116.6                                                  |             |

### VIII.- References.

- [1] H. E. Gottlieb, V. Kotlyar and A. Nudelman, *J. Org. Chem.*, 1997, **62**, 7512-7515.
- [2] Y. Ma, X. Zhang, C. Ma, W. Xia, L. Hu, X. Dong and Y. Xiong, *J. Org. Chem.*, 2023, **88**, 4264-4272.
- [3] L. Cicco, A. Fombona-Pascual, A. Sánchez-Condado, G. A. Carriedo, F. M. Perna, V. Capriati, A. Presa Soto and J. García-Álvarez, *ChemSusChem*, 2020, **13**, 4967-4973.
- [4] J. Zheng, X. Feng, Y. Yu, X. Zhen and Y. Zhao, *Phosphorus Sulfur Silicon Relat. Elem.*, 2013, **188**, 1080-1087.
- [5] X. Mo, Y. Xie, L. Wei, X. Gu, M. Zhang, X. Zhang and J. Jiang, *Org. Lett.*, 2023, **25**, 2338-2343.
- [6] K. Jia, J. Li and Y. Chen, *Chem. Eur. J.*, 2018, **24**, 3174-3177.
- [7] N. Fantozzi, J.-N. Volle, A. Porcheddu, D. Virieux, F. García and E. Colacino, *Chem. Soc. Rev.*, 2023, **52**, 6680-6714.

## IX.- Copy of NMR Spectra.

### ((4-Chlorophenyl)(hydroxy)methyl)diphenylphosphine oxide 3a

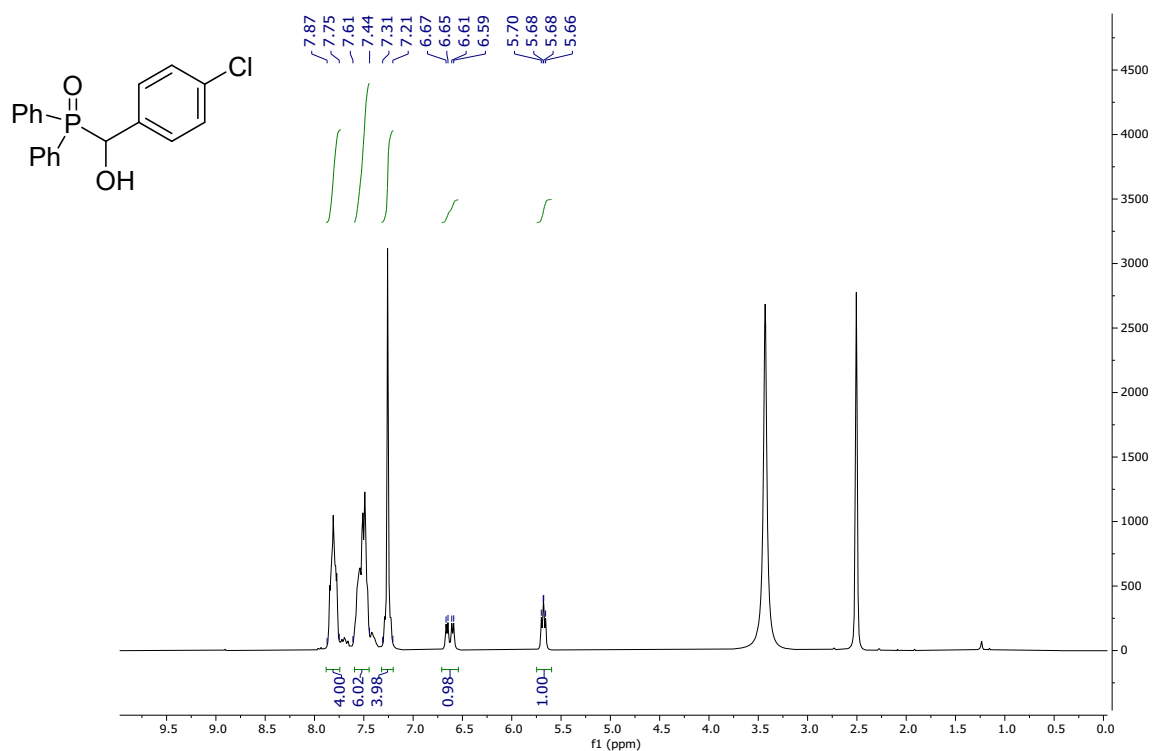

Figure SI\_3: <sup>1</sup>H-NMR for 3a in DMSO-*d*<sup>6</sup> (300 MHz).

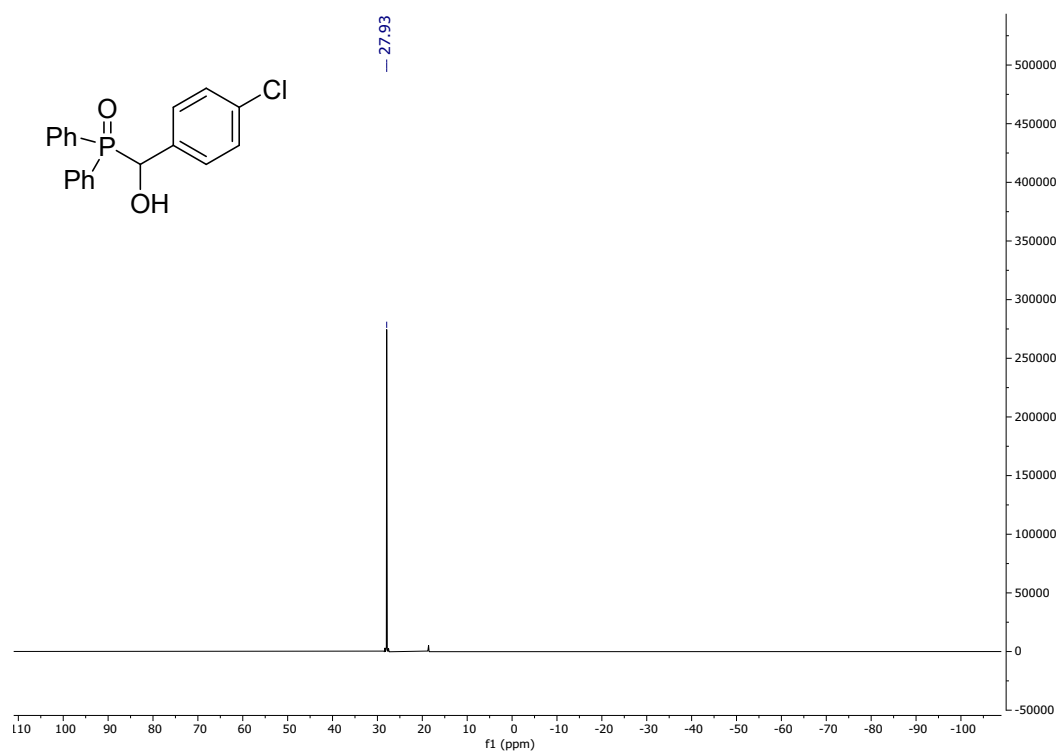

Figure SI\_4: <sup>31</sup>P-NMR for 3a in DMSO-*d*<sup>6</sup> (121 MHz).

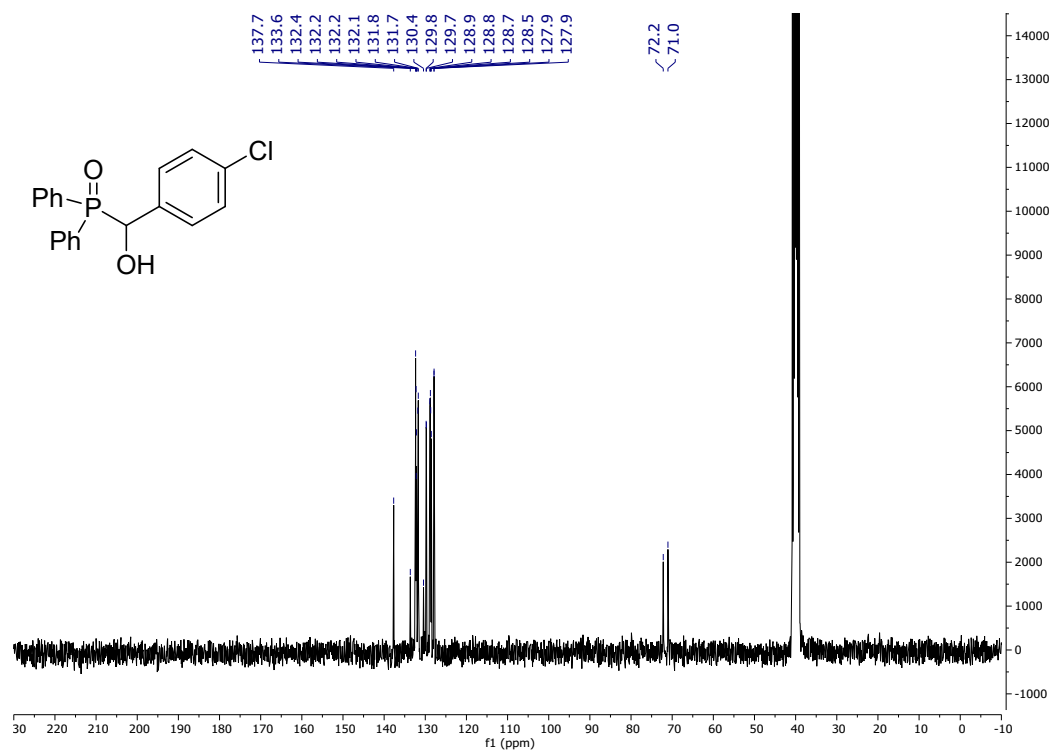

Figure SI\_5: <sup>13</sup>C-NMR for 3a in DMSO-*d*<sup>6</sup> (75 MHz).

(Hydroxy(phenyl)methyl)diphenylphosphine oxide 3b

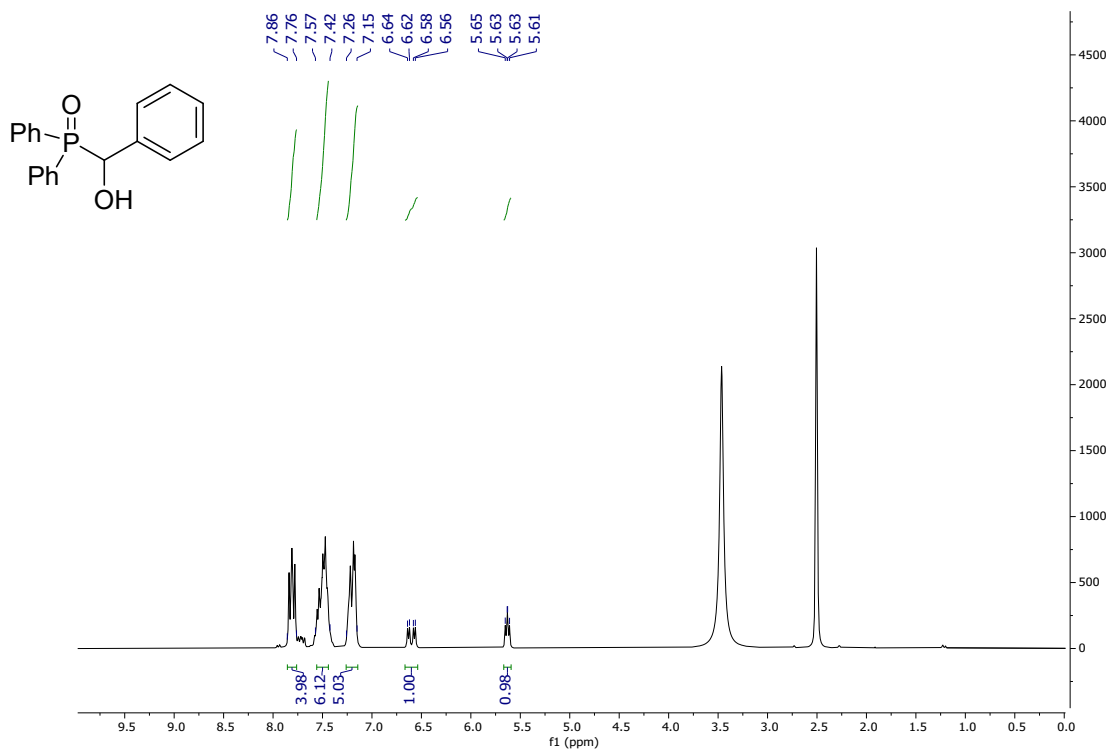

Figure SI\_6: <sup>1</sup>H-NMR for 3b in DMSO-*d*<sup>6</sup> (300 MHz).

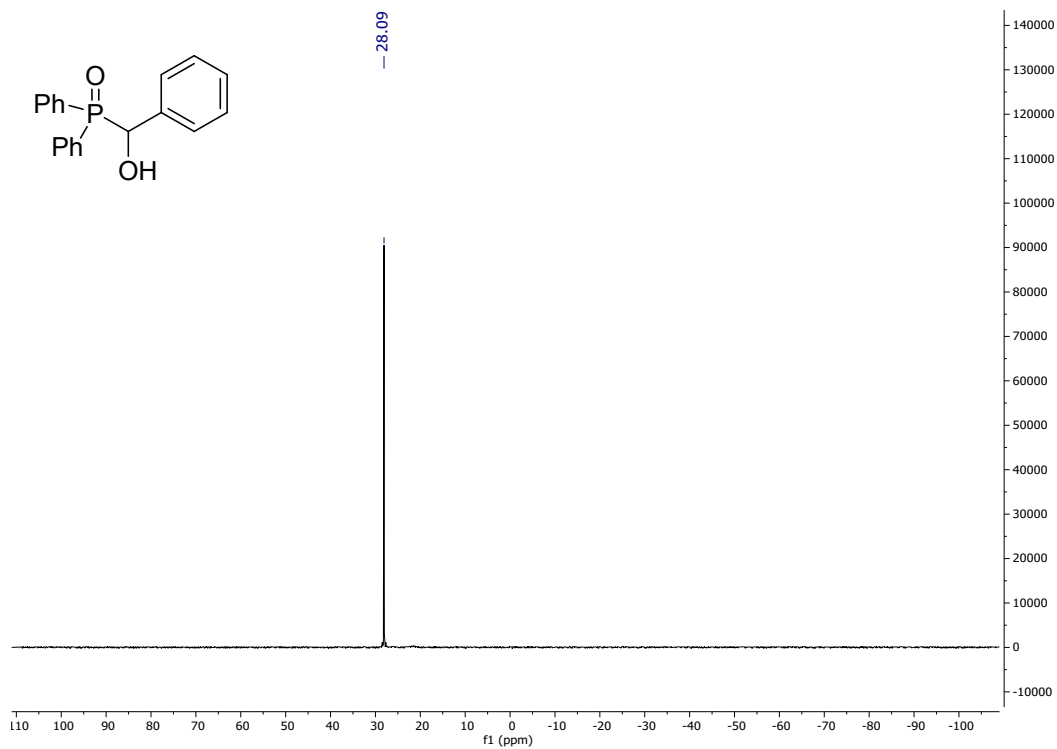

Figure SI\_7:  $^{31}\text{P}$ -NMR for **3b** in  $\text{DMSO-}d^6$  (121 MHz).

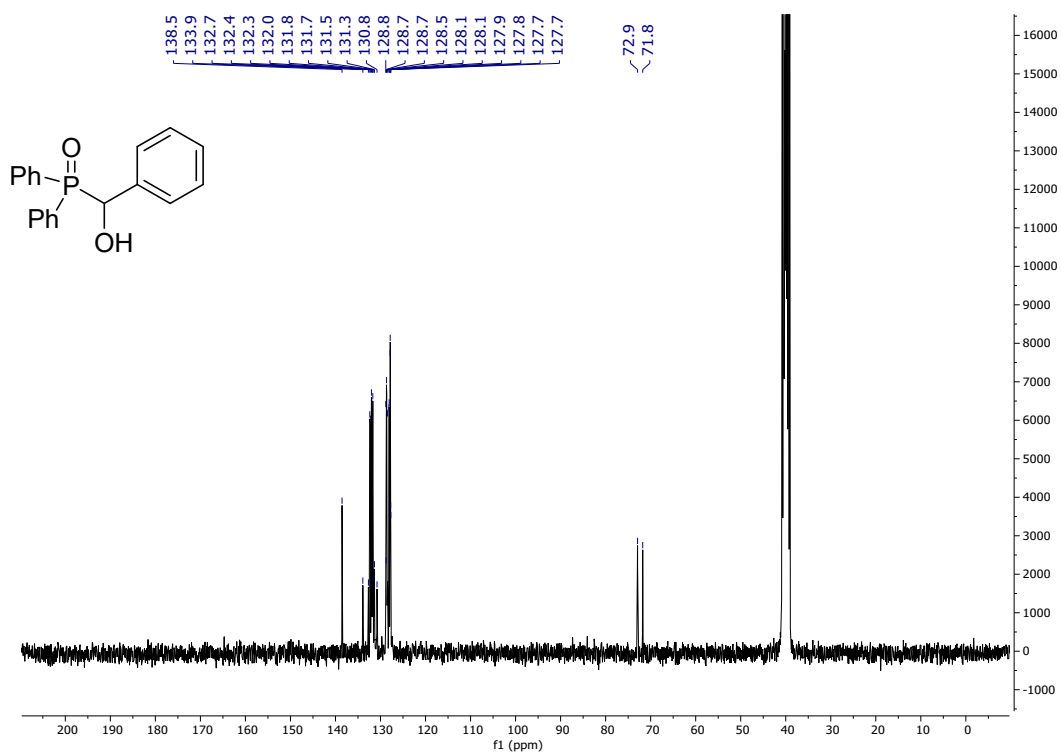

Figure SI\_8:  $^{13}\text{C}$ -NMR for **3b** in  $\text{DMSO-}d^6$  (75 MHz).

**((3-Chlorophenyl)(hydroxy)methyl)diphenylphosphine oxide 3c**

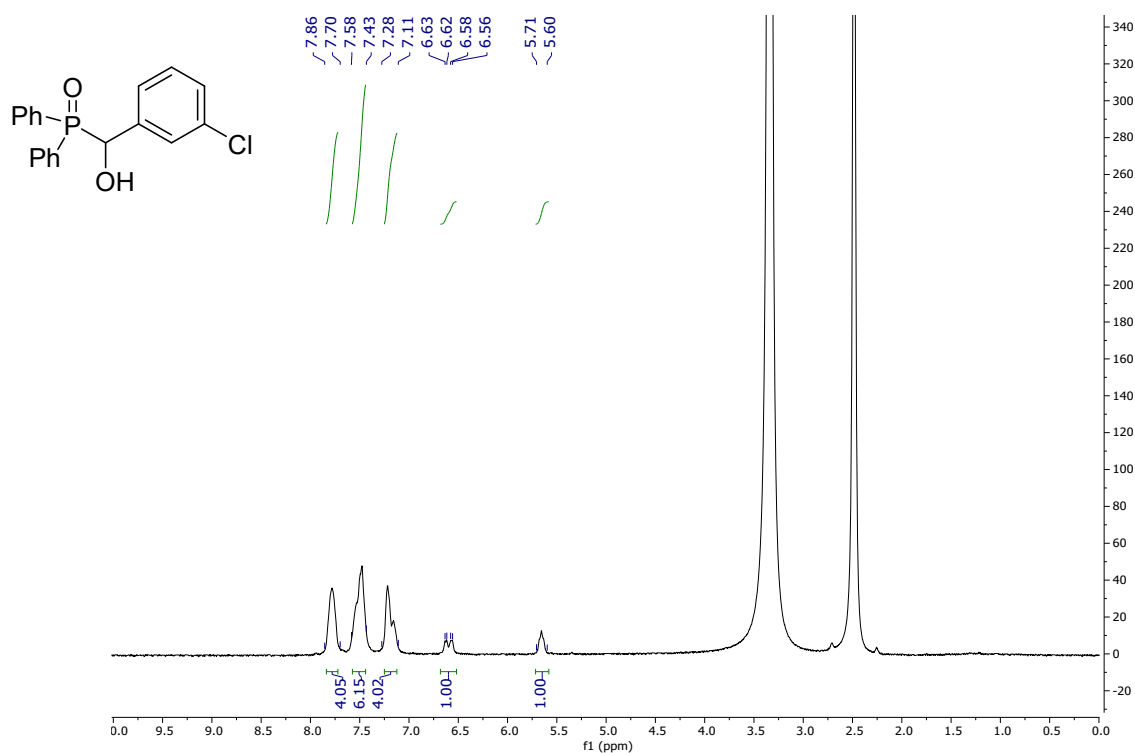

**Figure SI\_9:**  $^1\text{H-NMR}$  for **3c** in  $\text{DMSO-}d^6$  (300 MHz).

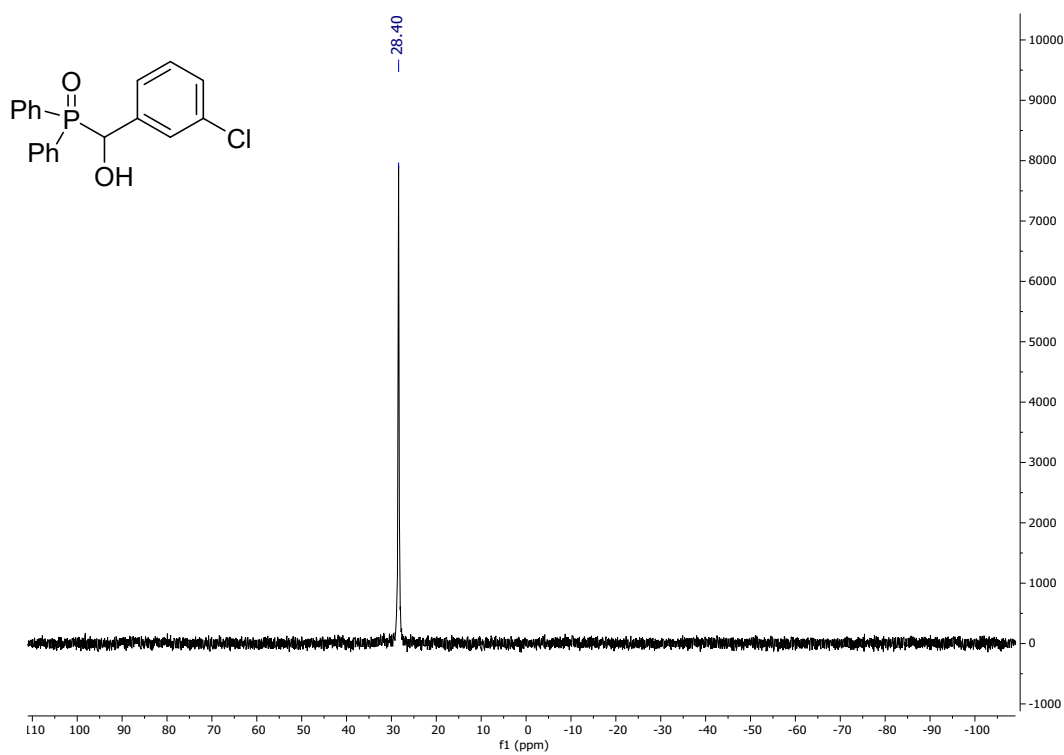

**Figure SI\_10:**  $^{31}\text{P-NMR}$  for **3c** in  $\text{DMSO-}d^6$  (121 MHz).

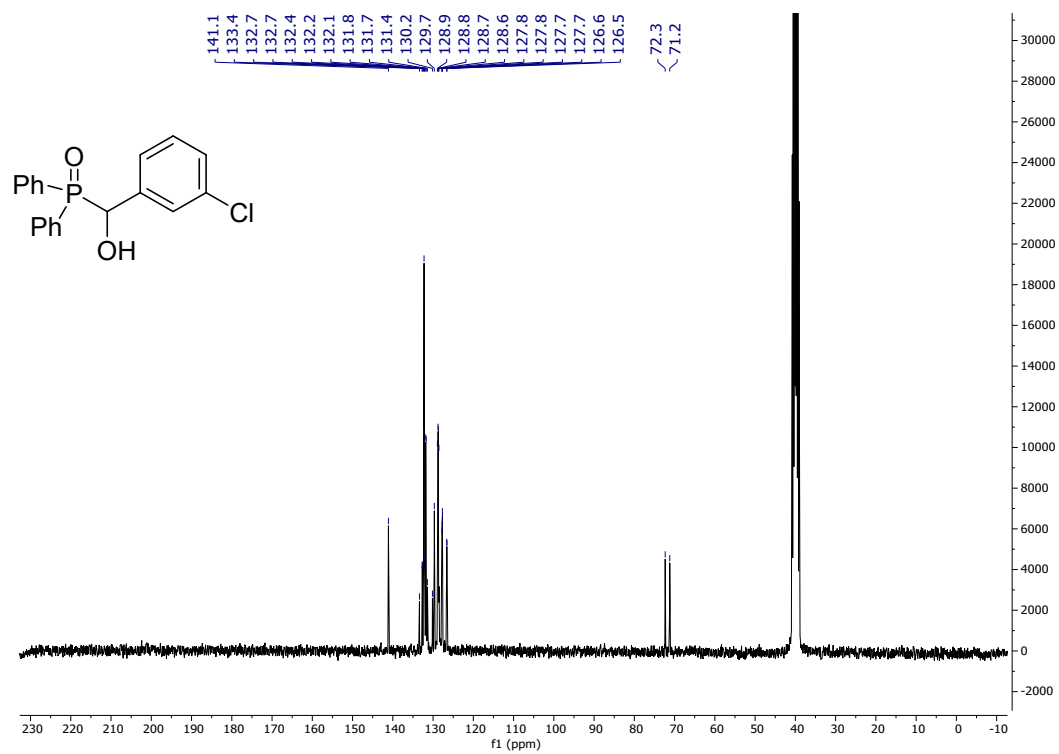

Figure SI\_11: <sup>13</sup>C-NMR for 3c in DMSO-*d*<sup>6</sup> (75 MHz).

**((2-Chlorophenyl)(hydroxy)methyl)diphenylphosphine oxide 3d**

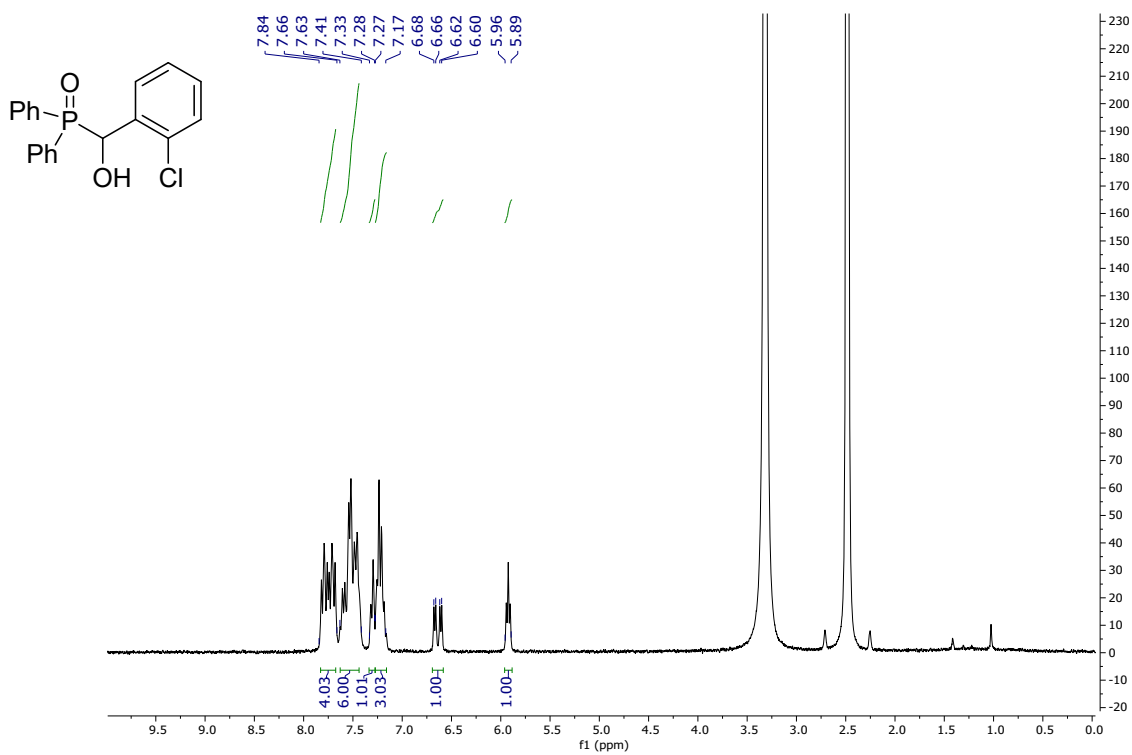

Figure SI\_12: <sup>1</sup>H-NMR for 3d in DMSO-*d*<sup>6</sup> (300 MHz).

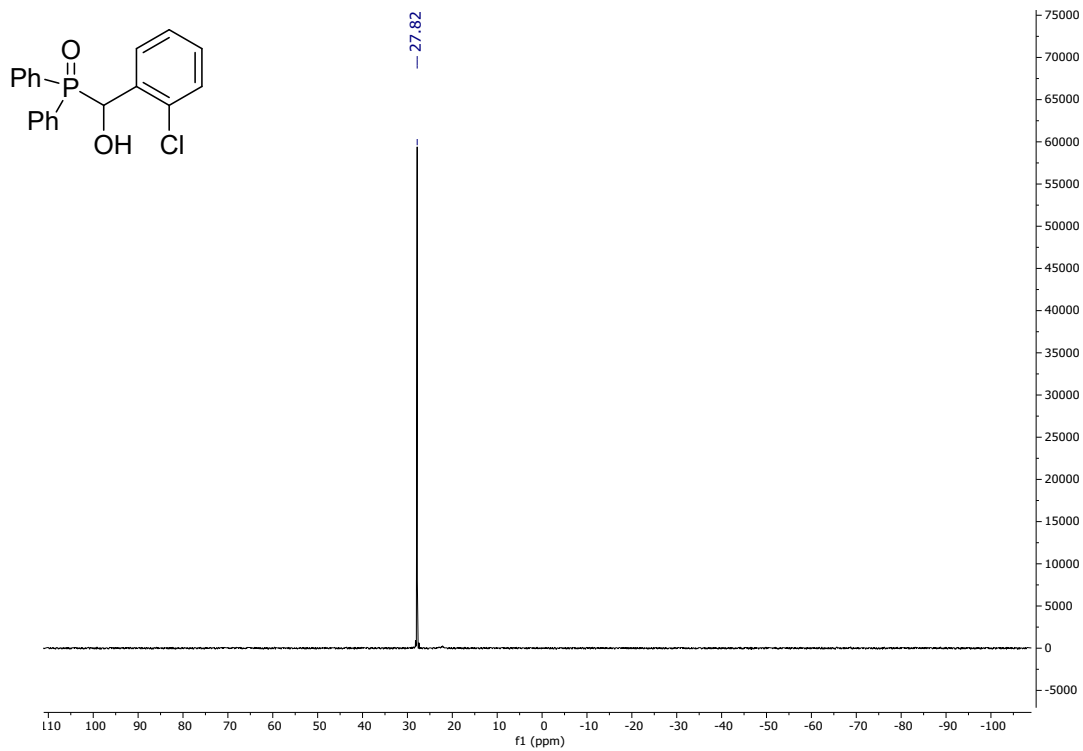

Figure SI\_13: <sup>31</sup>P-NMR for 3d in DMSO-*d*<sup>6</sup> (121 MHz).

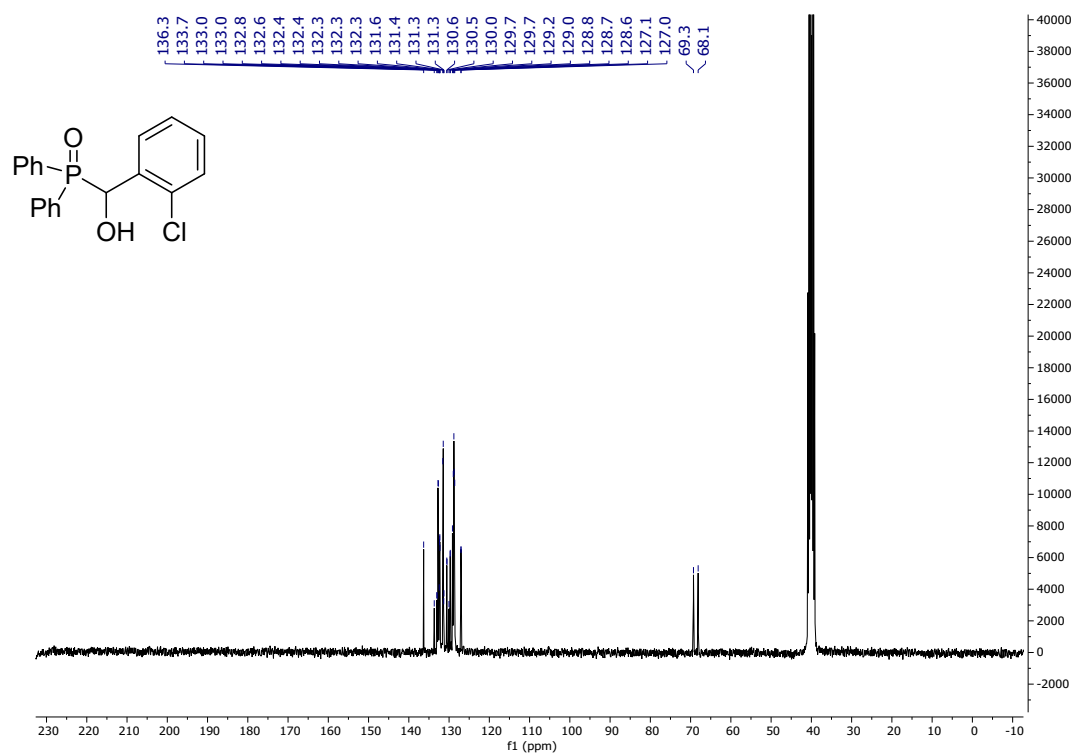

Figure SI\_14: <sup>13</sup>C-NMR for 3d in DMSO-*d*<sup>6</sup> (75 MHz).

**((4-Bromophenyl)(hydroxy)methyl)diphenylphosphine oxide 3e**

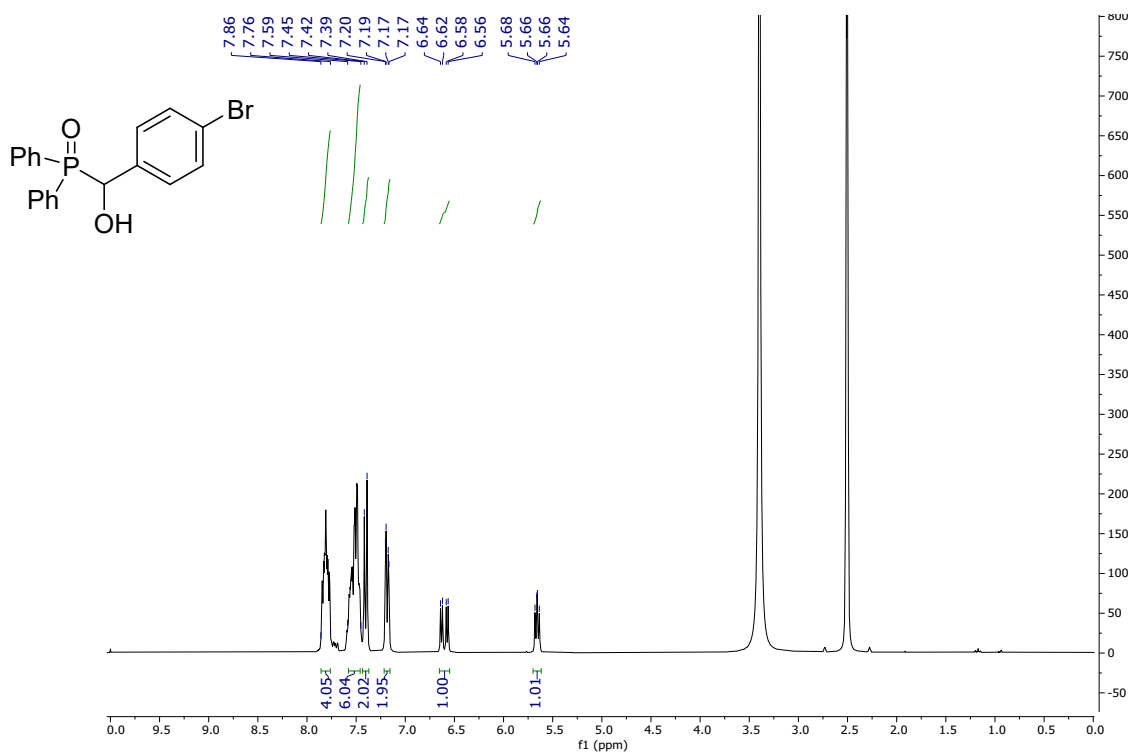

**Figure SI\_15:** <sup>1</sup>H-NMR for 3e in DMSO-*d*<sub>6</sub> (300 MHz).

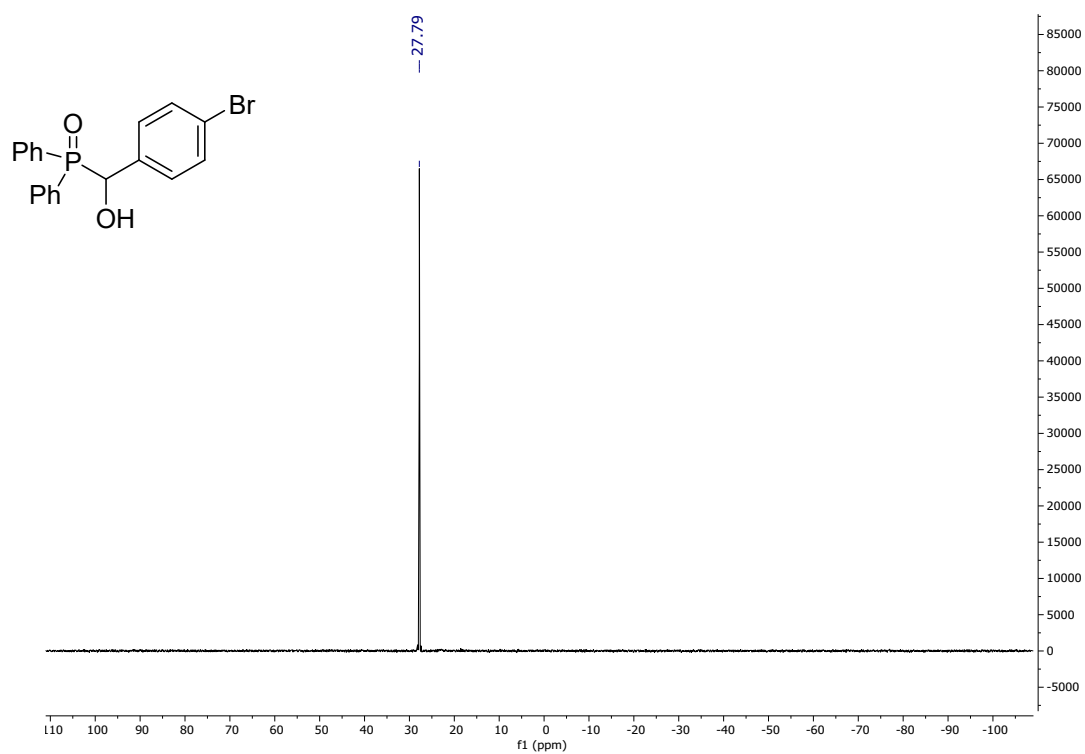

**Figure SI\_16:** <sup>31</sup>P-NMR for 3e in DMSO-*d*<sub>6</sub> (121 MHz).

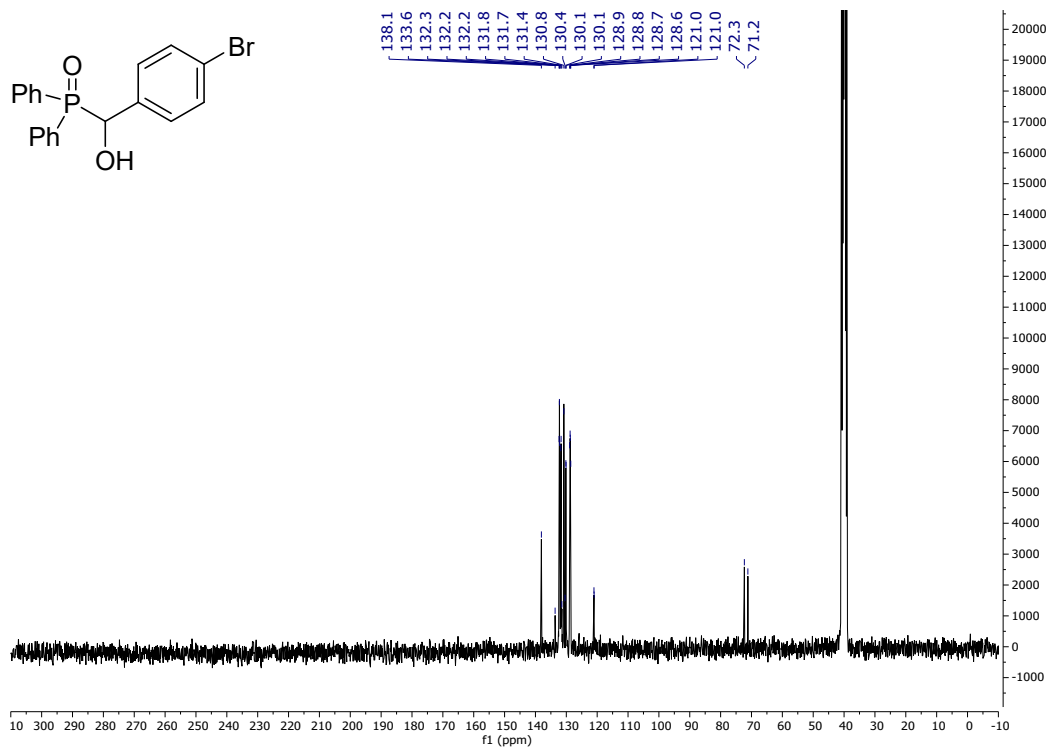

Figure SI\_17:  $^{13}\text{C-NMR}$  for **3e** in  $\text{DMSO-}d^6$  (75 MHz).

**(Hydroxy(4-nitrophenyl)methyl)diphenylphosphine oxide 3f**

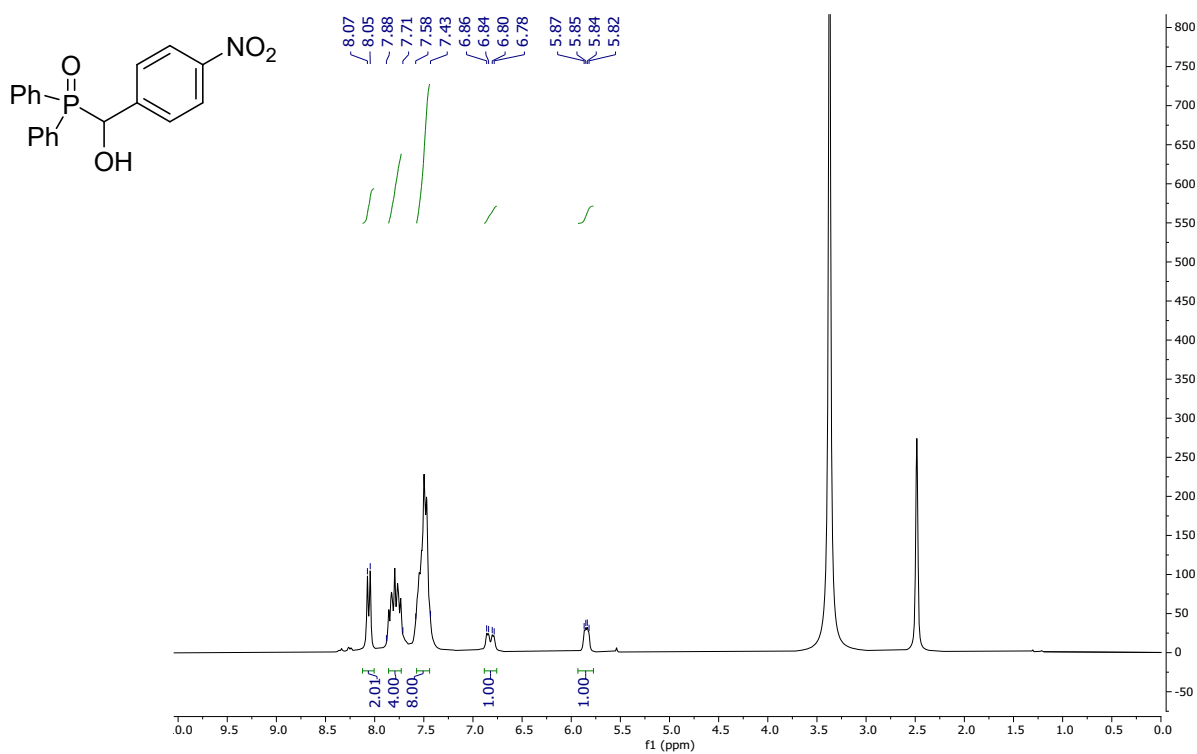

Figure SI\_18:  $^1\text{H-NMR}$  for **3f** in  $\text{DMSO-}d^6$  (300 MHz).

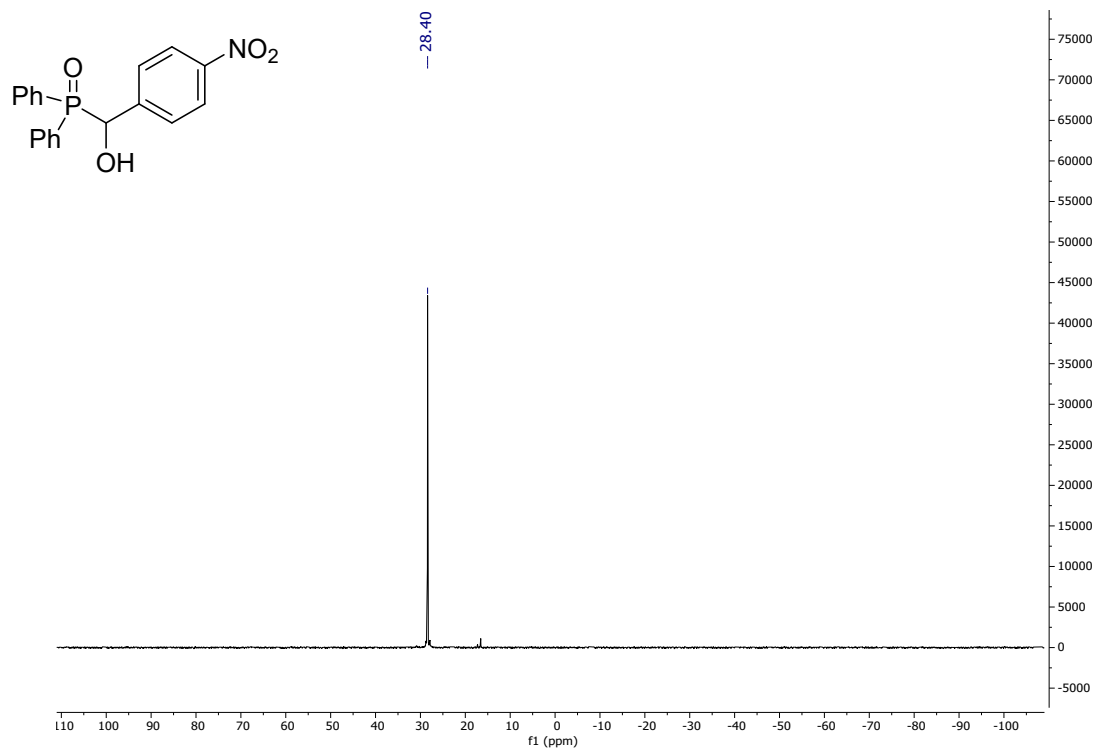

Figure SI\_19:  $^{31}\text{P}$ -NMR for **3f** in  $\text{DMSO-}d_6$  (121 MHz).

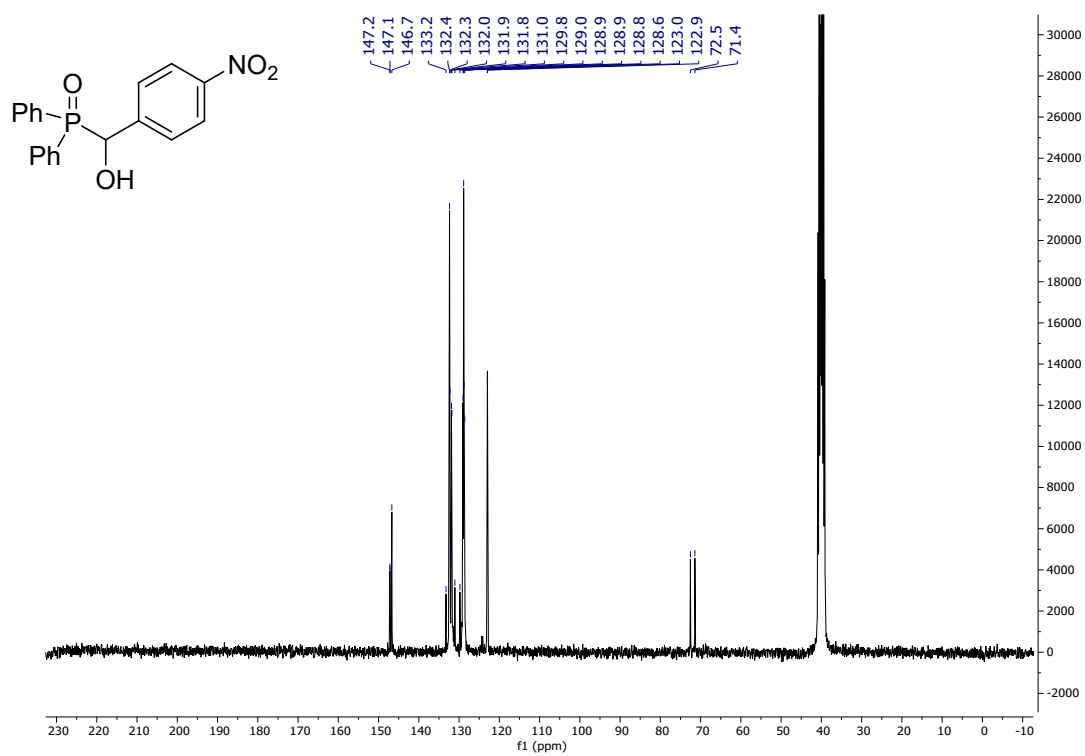

Figure SI\_20:  $^{13}\text{C}$ -NMR for **3f** in  $\text{DMSO-}d_6$  (75 MHz).

**(Hydroxy(3-nitrophenyl)methyl)diphenylphosphine oxide 3g**

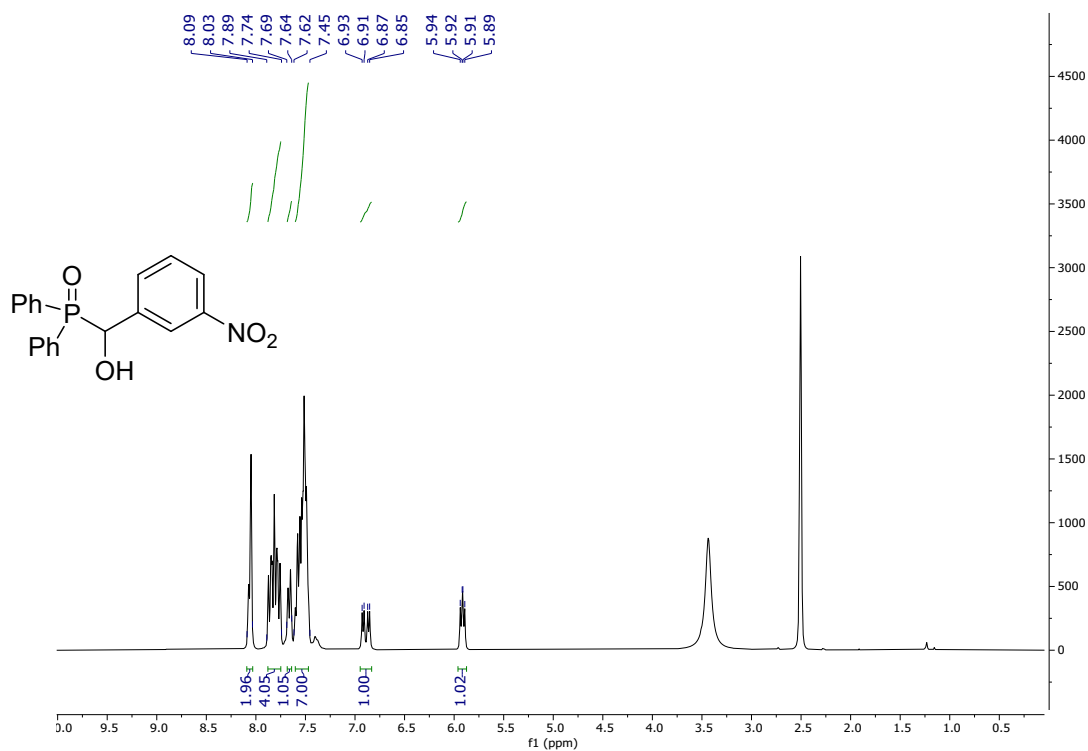

**Figure SI\_21:** <sup>1</sup>H-NMR for **3g** in DMSO-*d*<sub>6</sub> (300 MHz).

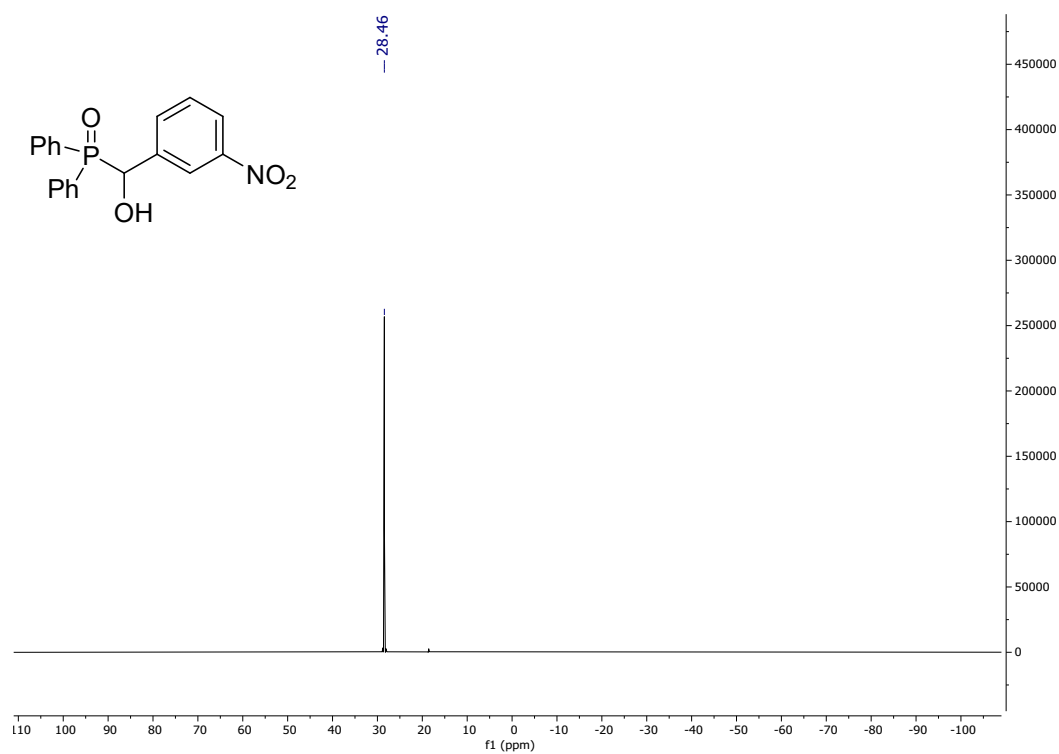

**Figure SI\_22:** <sup>31</sup>P-NMR for **3g** in DMSO-*d*<sub>6</sub> (121 MHz).

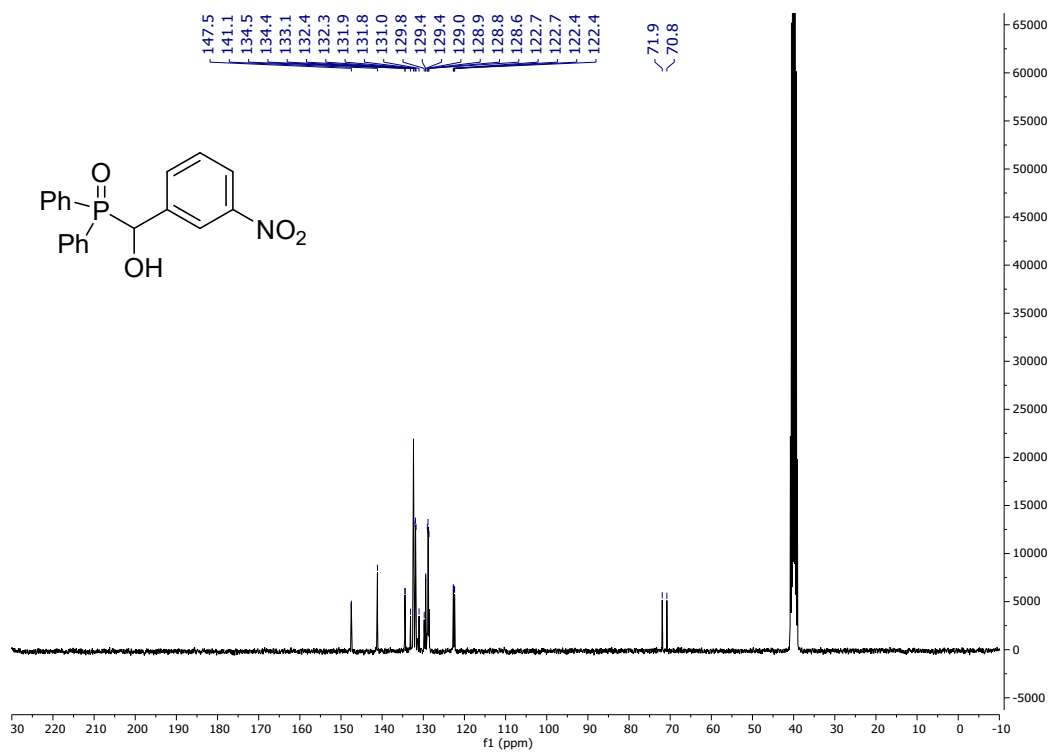

Figure SI\_23: <sup>13</sup>C-NMR for 3g in DMSO-*d*<sup>6</sup> (75 MHz).

(Hydroxy(4-hydroxyphenyl)methyl)diphenylphosphine oxide 3h

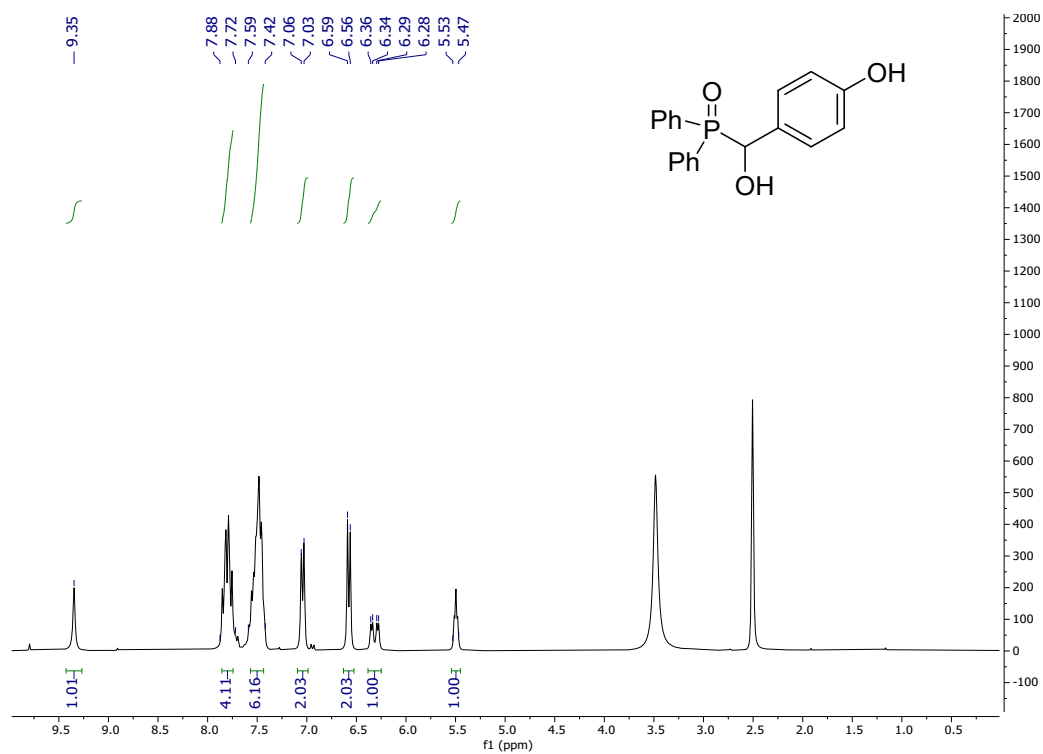

Figure SI\_24: <sup>1</sup>H-NMR for 3h in DMSO-*d*<sup>6</sup> (300 MHz).

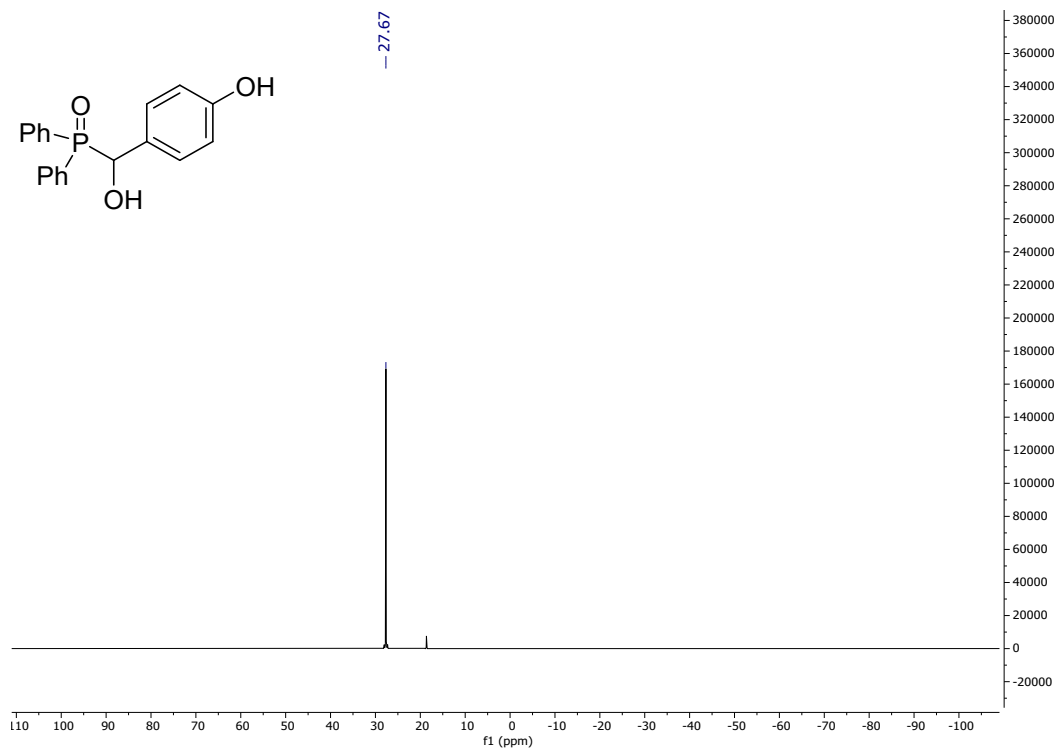

**Figure SI\_25:** <sup>31</sup>P-NMR for **3h** in DMSO-*d*<sup>6</sup> (121 MHz).

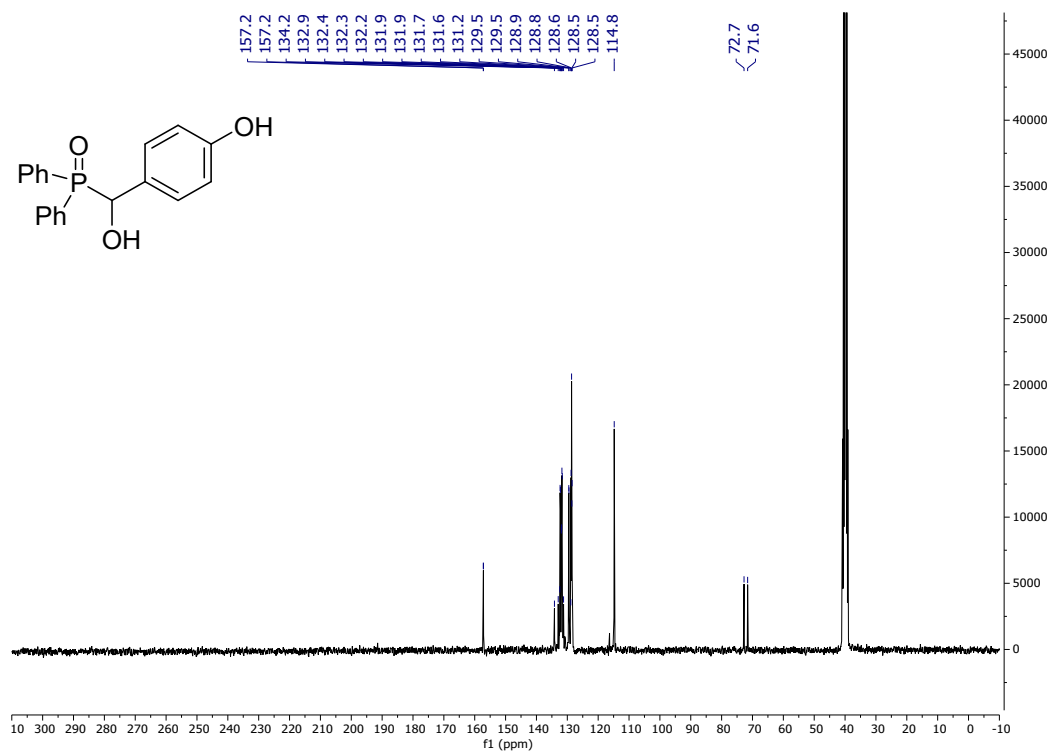

**Figure SI\_26:** <sup>13</sup>C-NMR for **3h** in DMSO-*d*<sup>6</sup> (75 MHz).

**(Hydroxy(4-methoxyphenyl)methyl)diphenylphosphine oxide 3i**

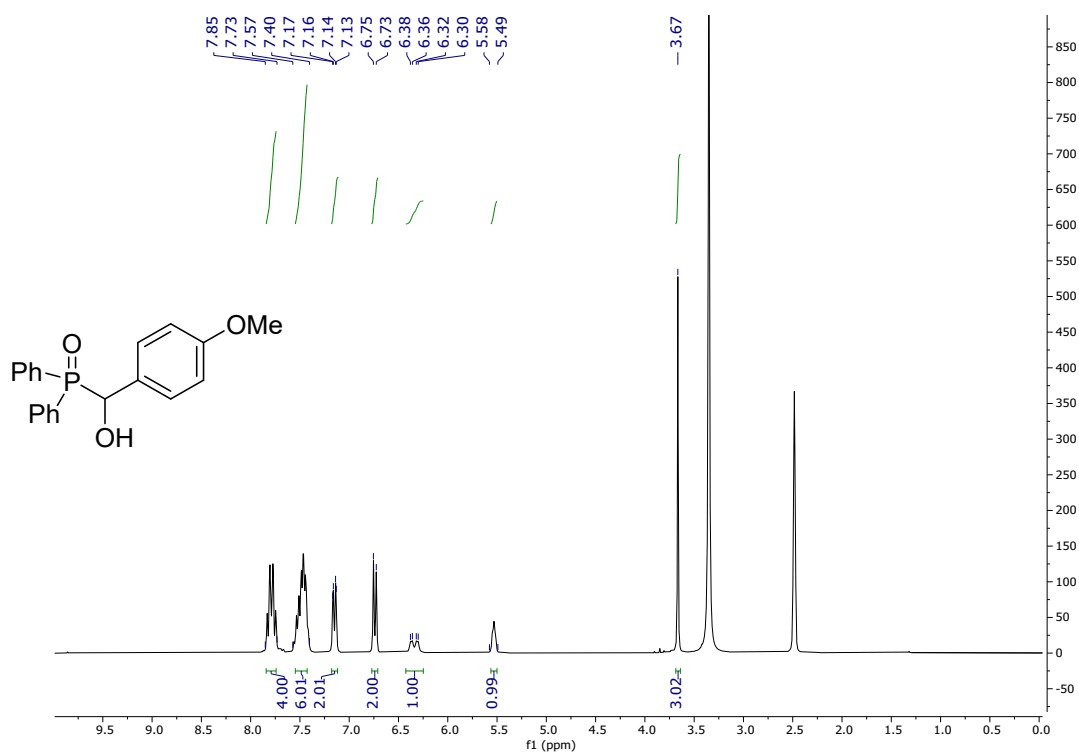

**Figure SI\_27:** <sup>1</sup>H-NMR for **3i** in DMSO-*d*<sub>6</sub> (300 MHz).

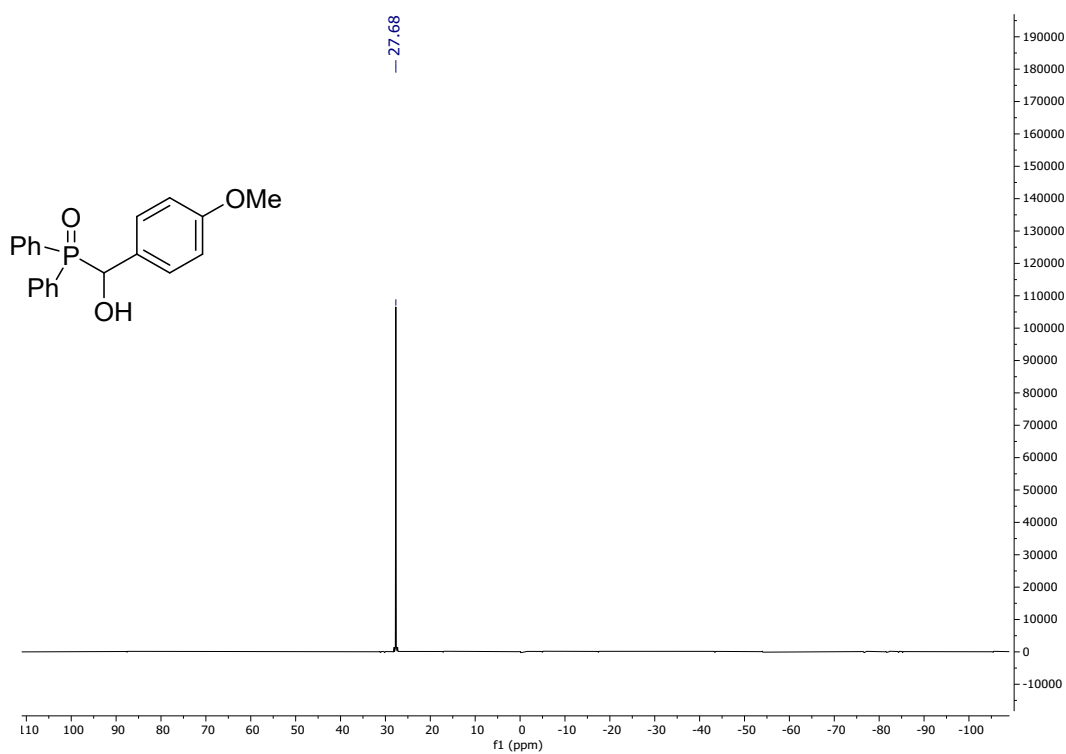

**Figure SI\_28:** <sup>31</sup>P-NMR for **3i** in DMSO-*d*<sub>6</sub> (121 MHz).

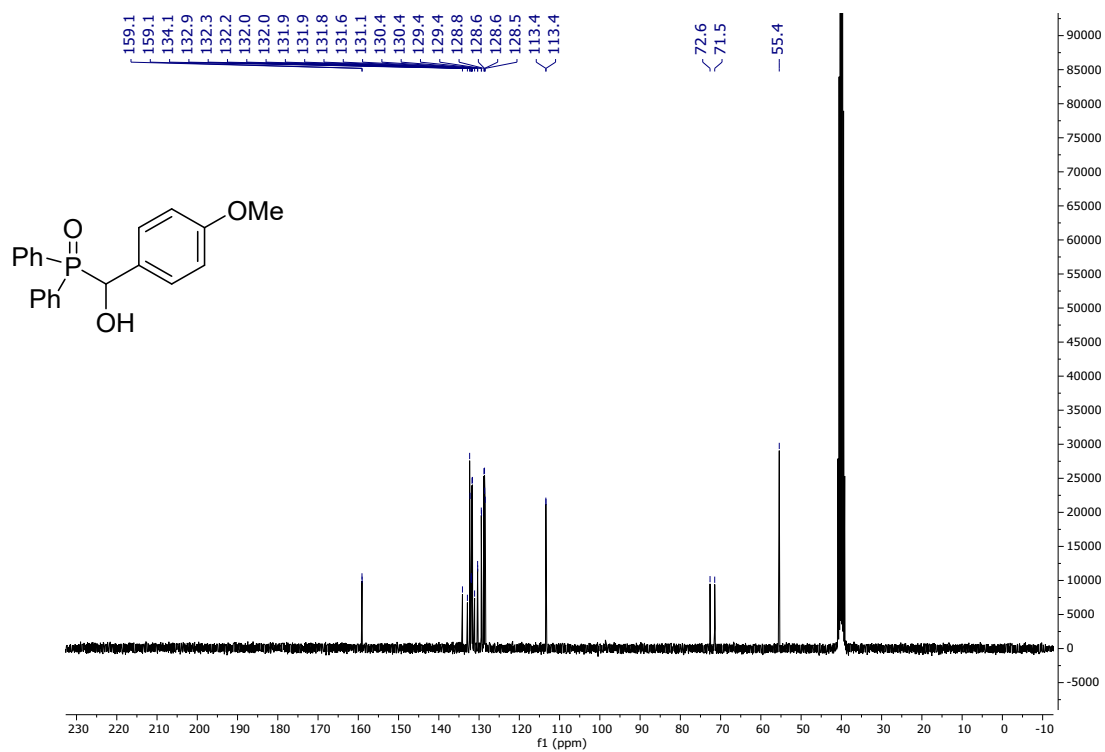

Figure SI\_29: <sup>13</sup>C-NMR for 3i in DMSO-*d*<sup>6</sup> (75 MHz).

(Hydroxy(2-methoxyphenyl)methyl)diphenylphosphine oxide 3j

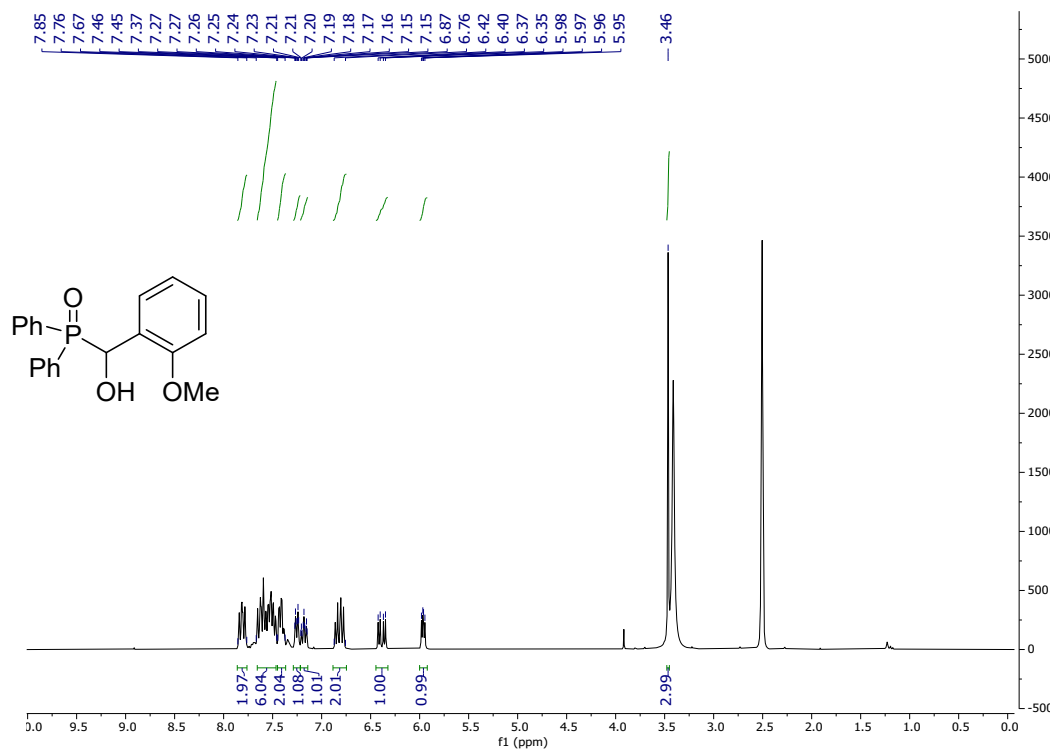

Figure SI\_30: <sup>1</sup>H-NMR for 3j in DMSO-*d*<sup>6</sup> (300 MHz).

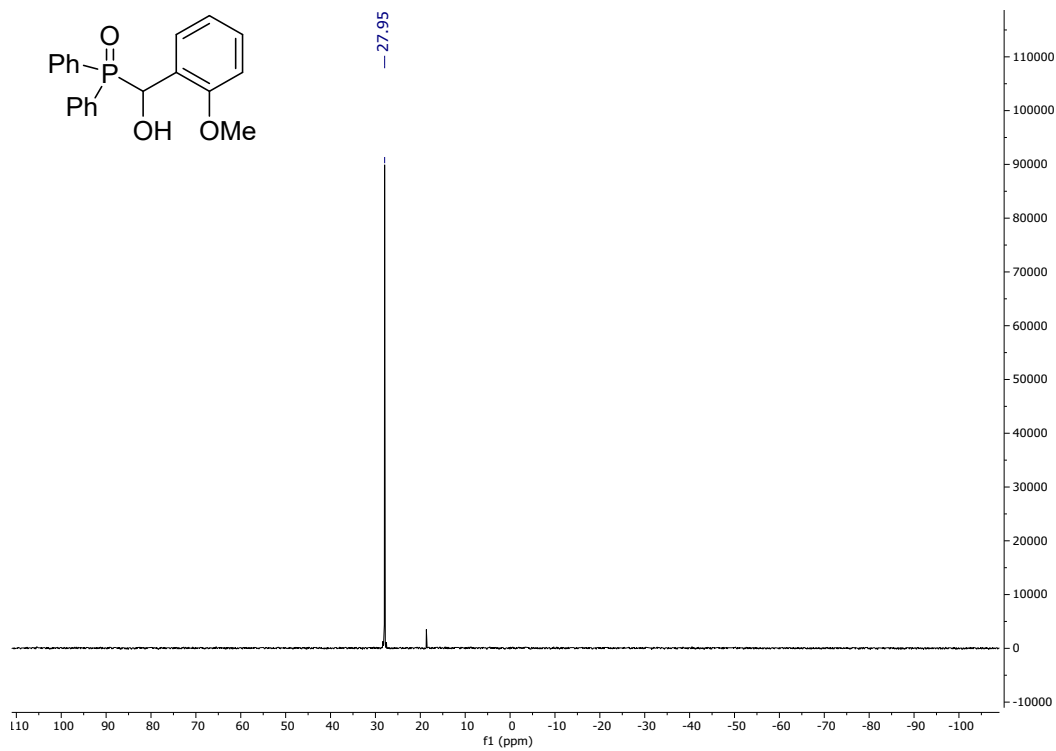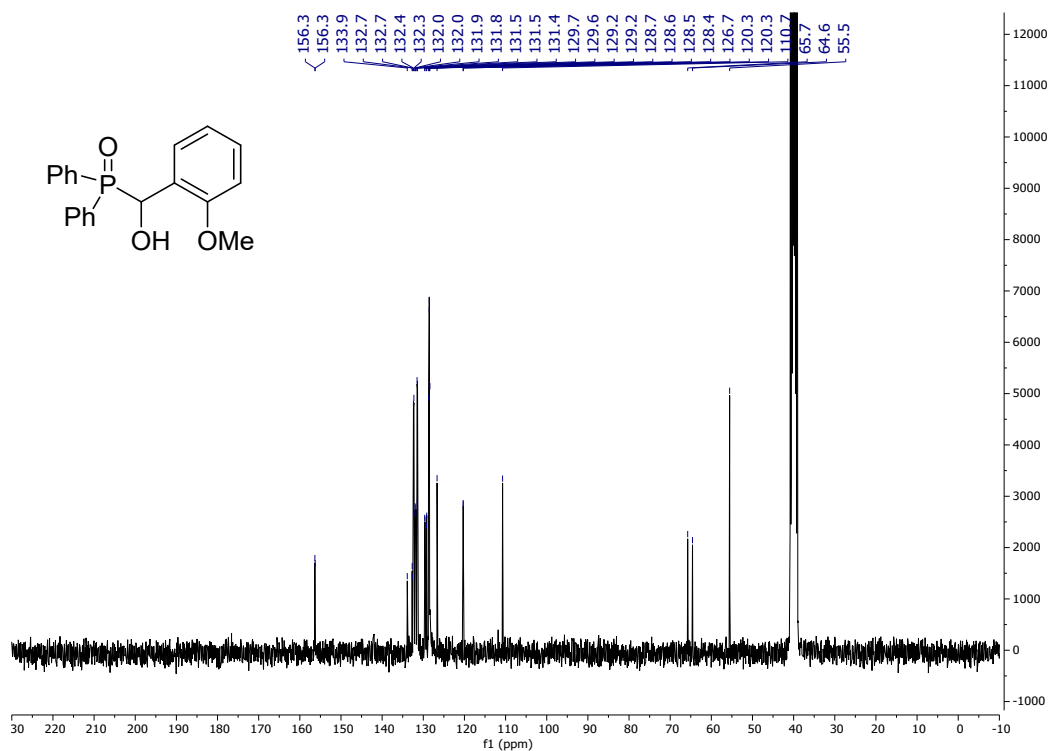

**(Furan-2-yl(hydroxy)methyl)diphenylphosphine oxide 3k**

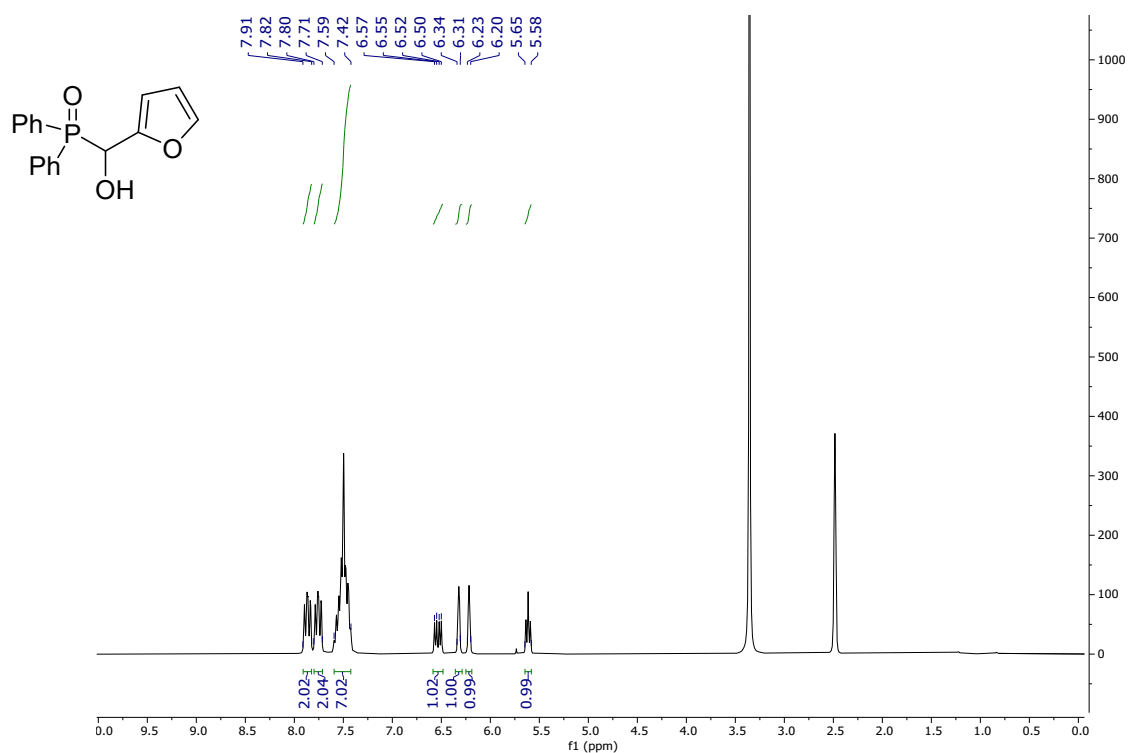

**Figure SI\_33:** <sup>1</sup>H-NMR for 3k in DMSO-*d*<sub>6</sub> (300 MHz).

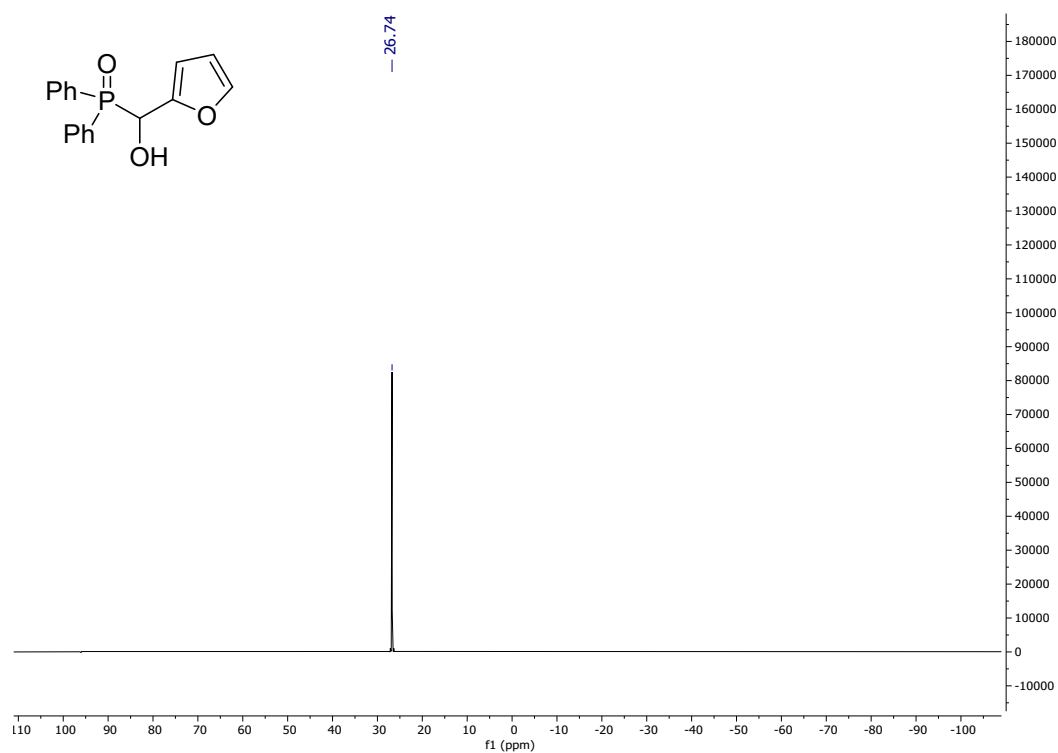

**Figure SI\_34:** <sup>31</sup>P-NMR for 3k in DMSO-*d*<sub>6</sub> (121 MHz).

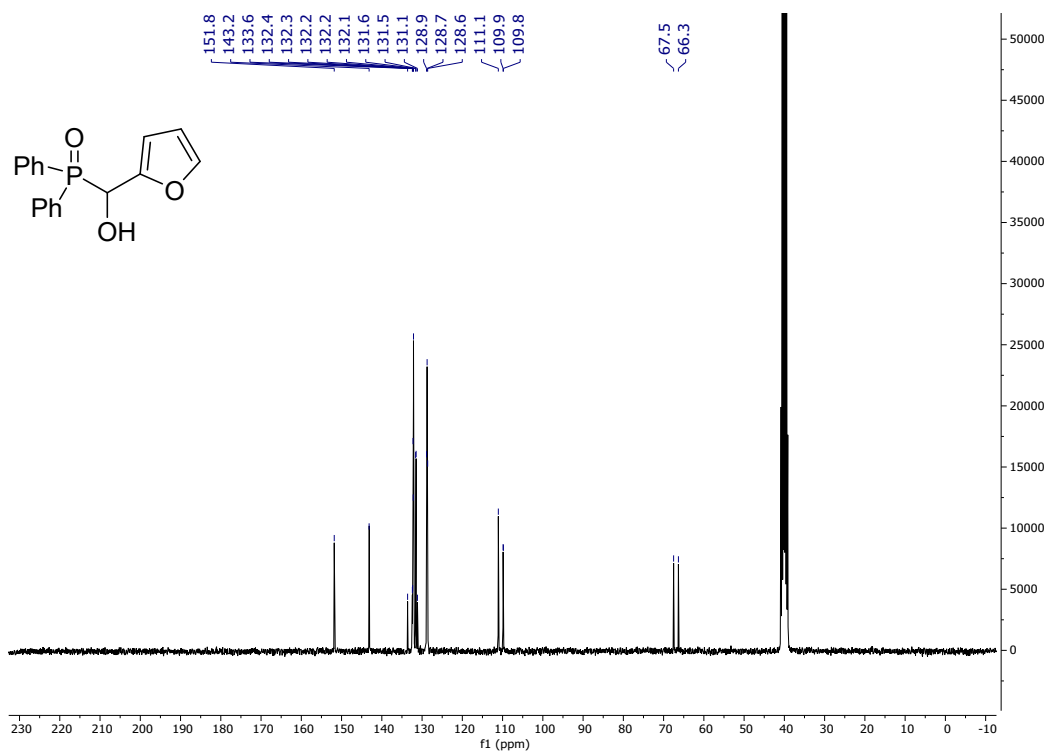

Figure SI\_35: <sup>13</sup>C-NMR for 3k in DMSO-*d*<sup>6</sup> (75 MHz).

(Hydroxy(thiophen-2-yl)methyl)diphenylphosphine oxide 3l

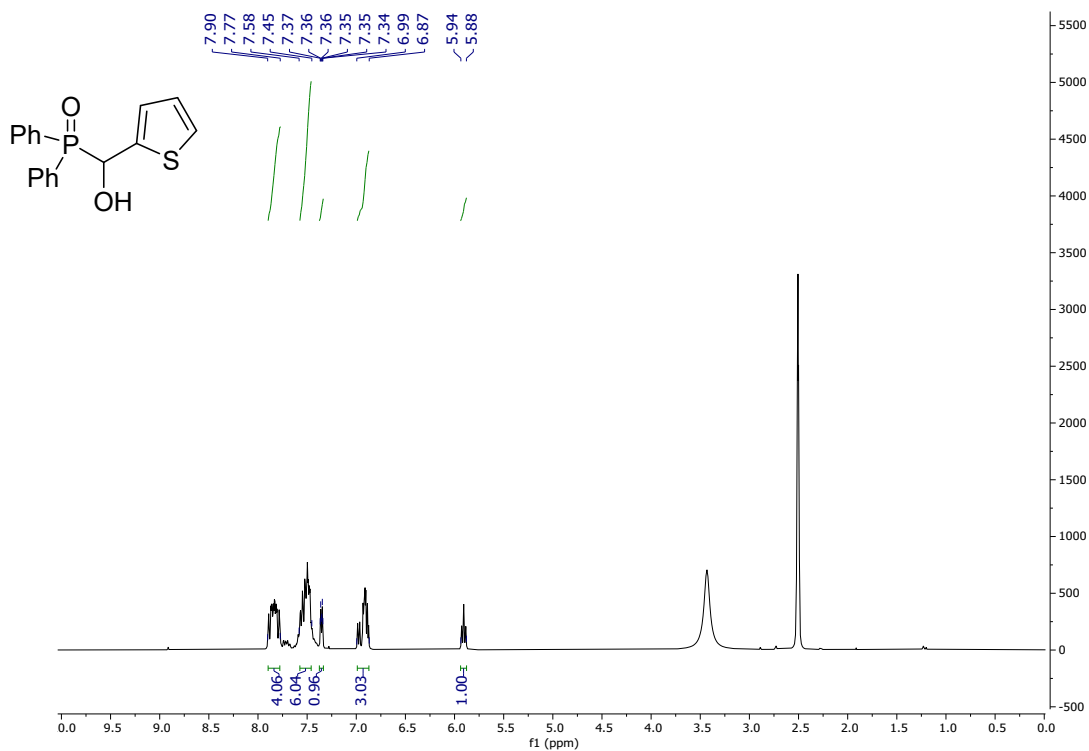

Figure SI\_36: <sup>1</sup>H-NMR for 3l in DMSO-*d*<sup>6</sup> (300 MHz).

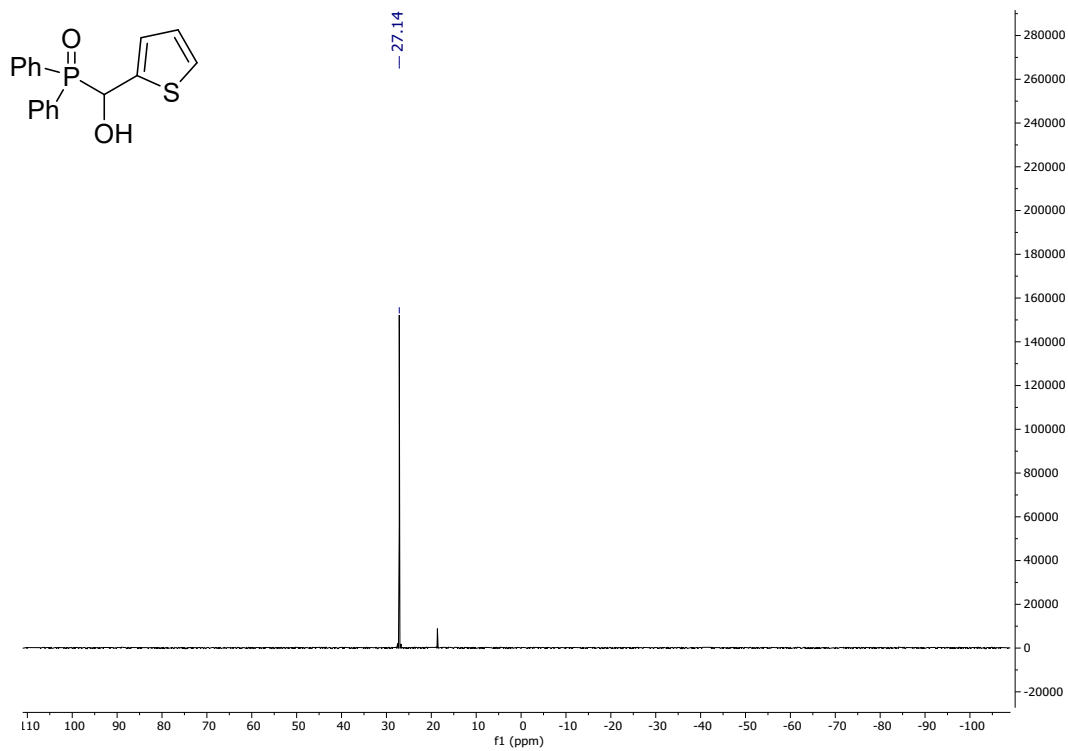

Figure SI\_37:  $^{31}\text{P}$ -NMR for 31 in  $\text{DMSO-}d^6$  (121 MHz).

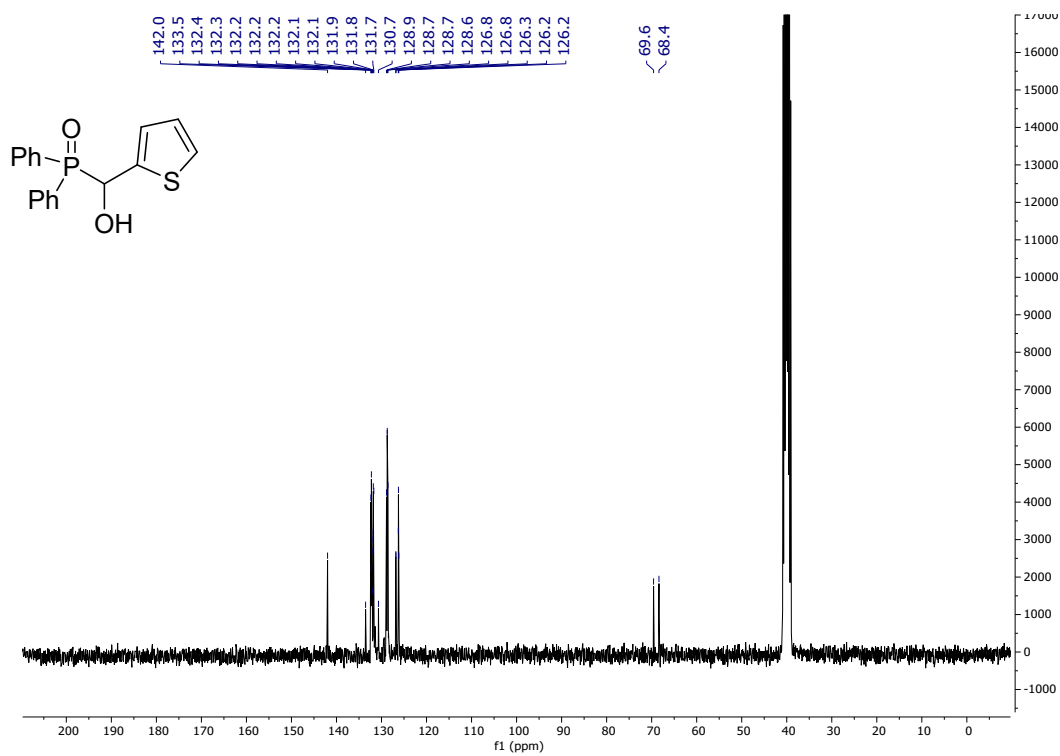

Figure SI\_38:  $^{13}\text{C}$ -NMR for 31 in  $\text{DMSO-}d^6$  (75 MHz).

**(E)-(1-Hydroxy-3-(2-nitrophenyl)allyl)diphenylphosphine oxide 3m**

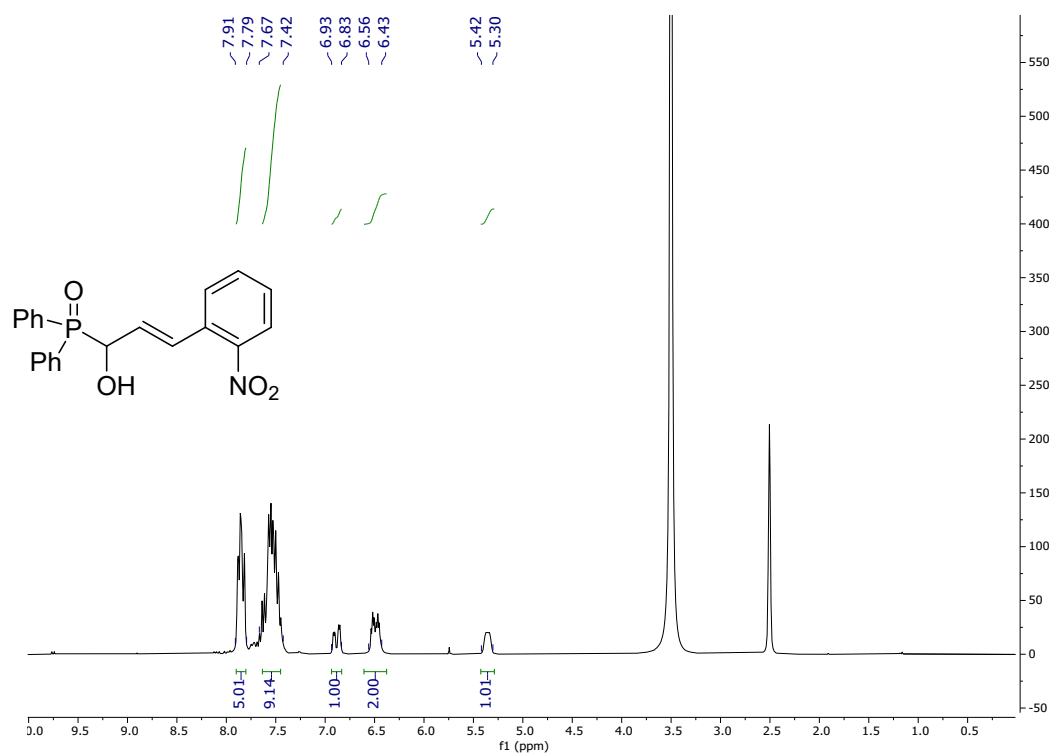

**Figure SI\_39:** <sup>1</sup>H-NMR for 3m in DMSO-*d*<sub>6</sub> (300 MHz).

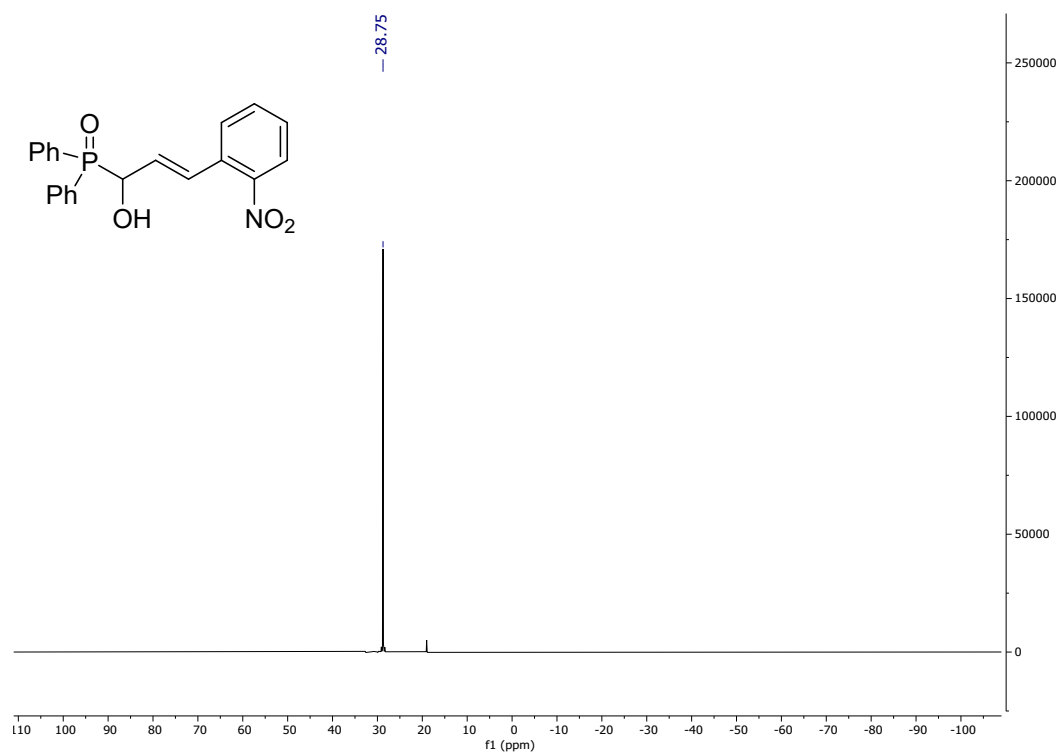

**Figure SI\_40:** <sup>31</sup>P-NMR for 3m in DMSO-*d*<sub>6</sub> (121 MHz).

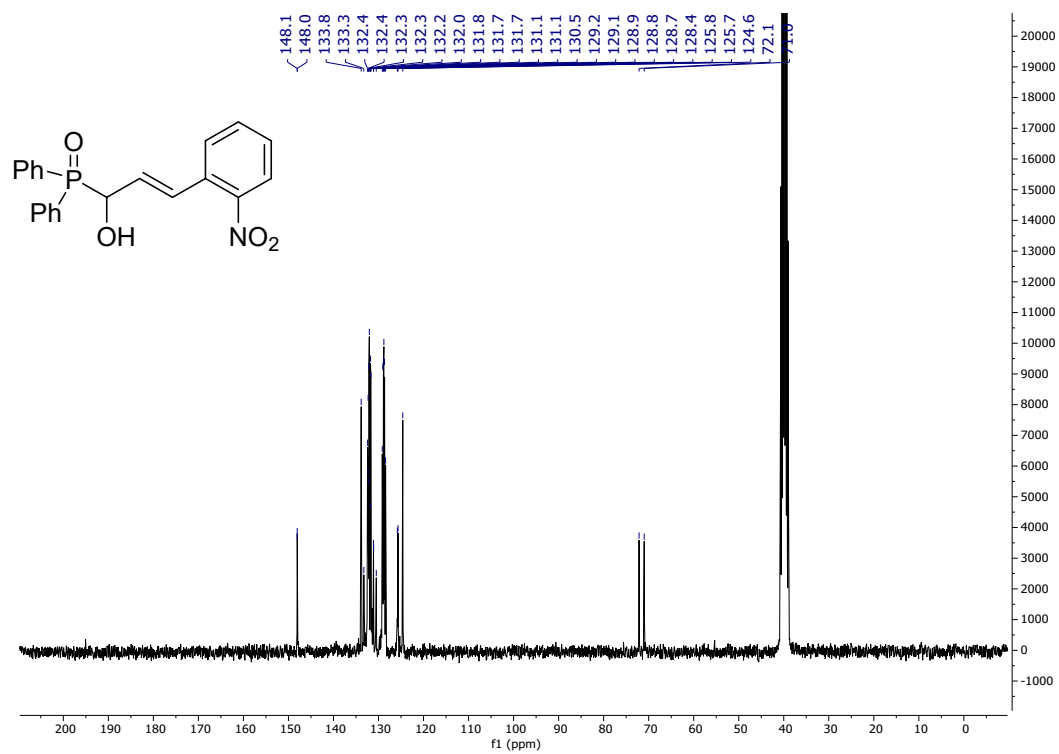

Figure SI\_41: <sup>13</sup>C-NMR for **3m** in DMSO-*d*<sup>6</sup> (75 MHz).

(Hydroxy(naphthalen-1-yl)methyl)diphenylphosphine oxide **3n**

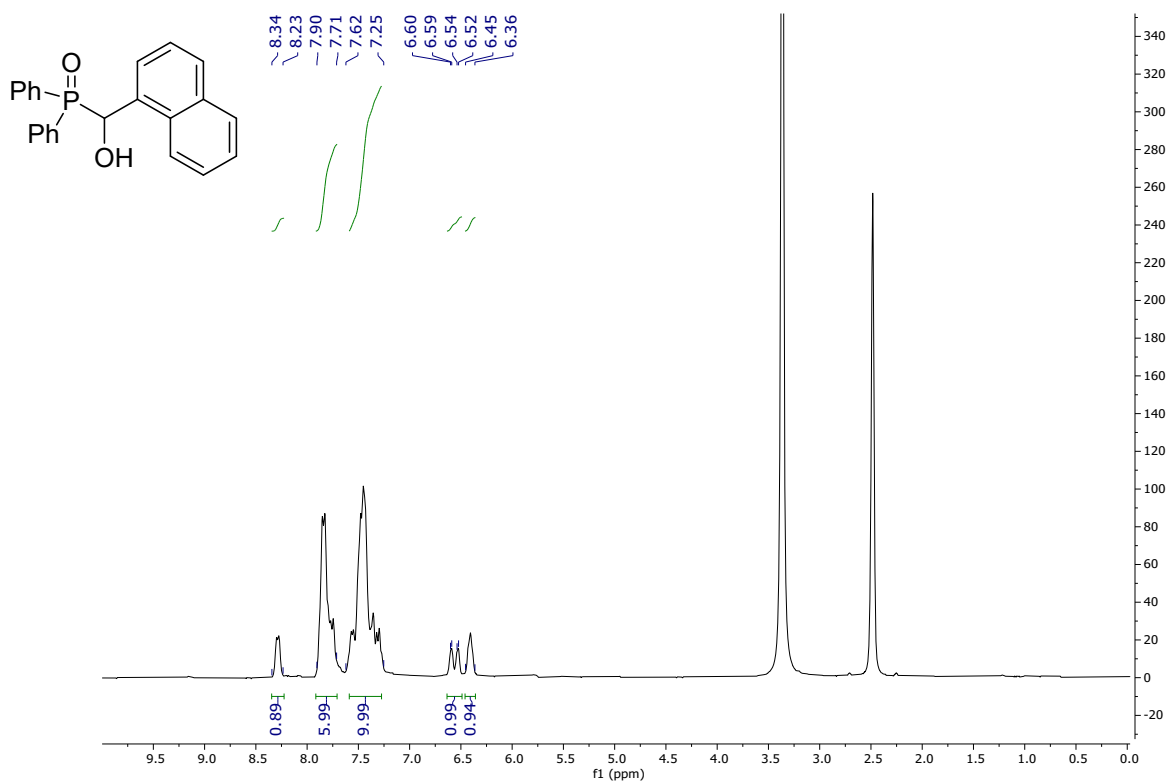

Figure SI\_42: <sup>1</sup>H-NMR for **3n** in DMSO-*d*<sup>6</sup> (300 MHz).

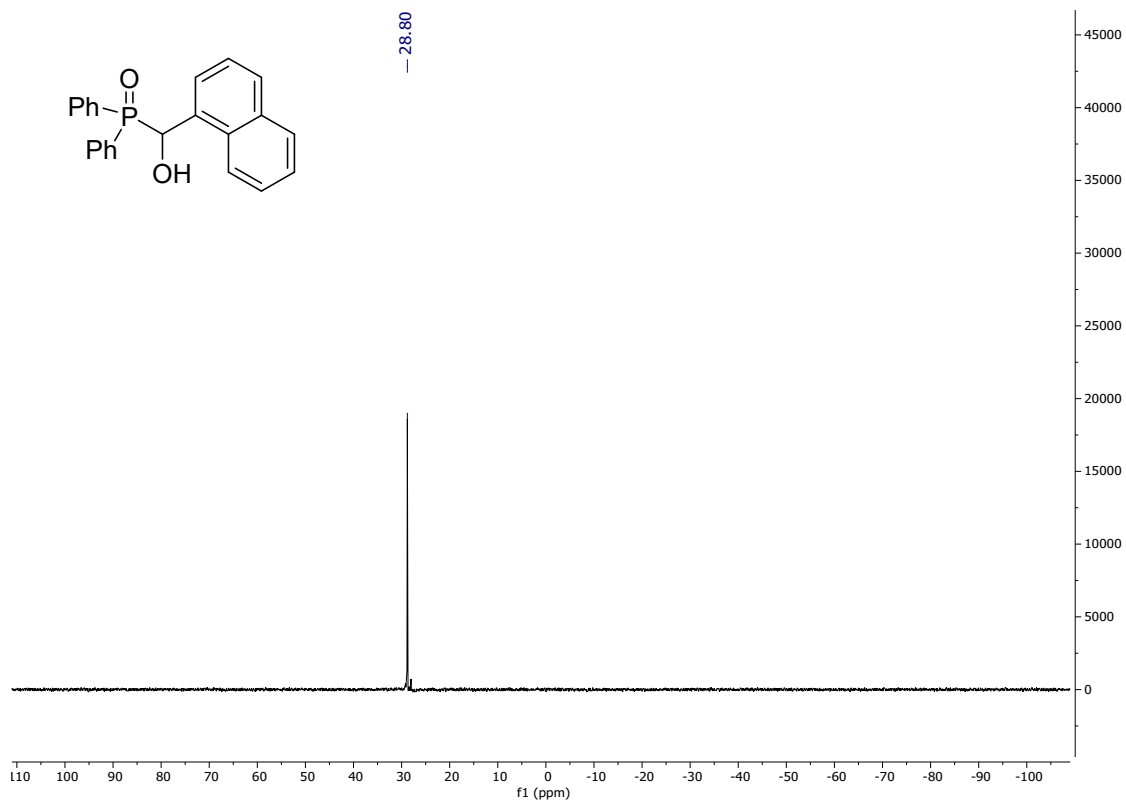

Figure SI\_43:  $^{31}\text{P}$ -NMR for **3n** in  $\text{DMSO-}d^6$  (121 MHz).

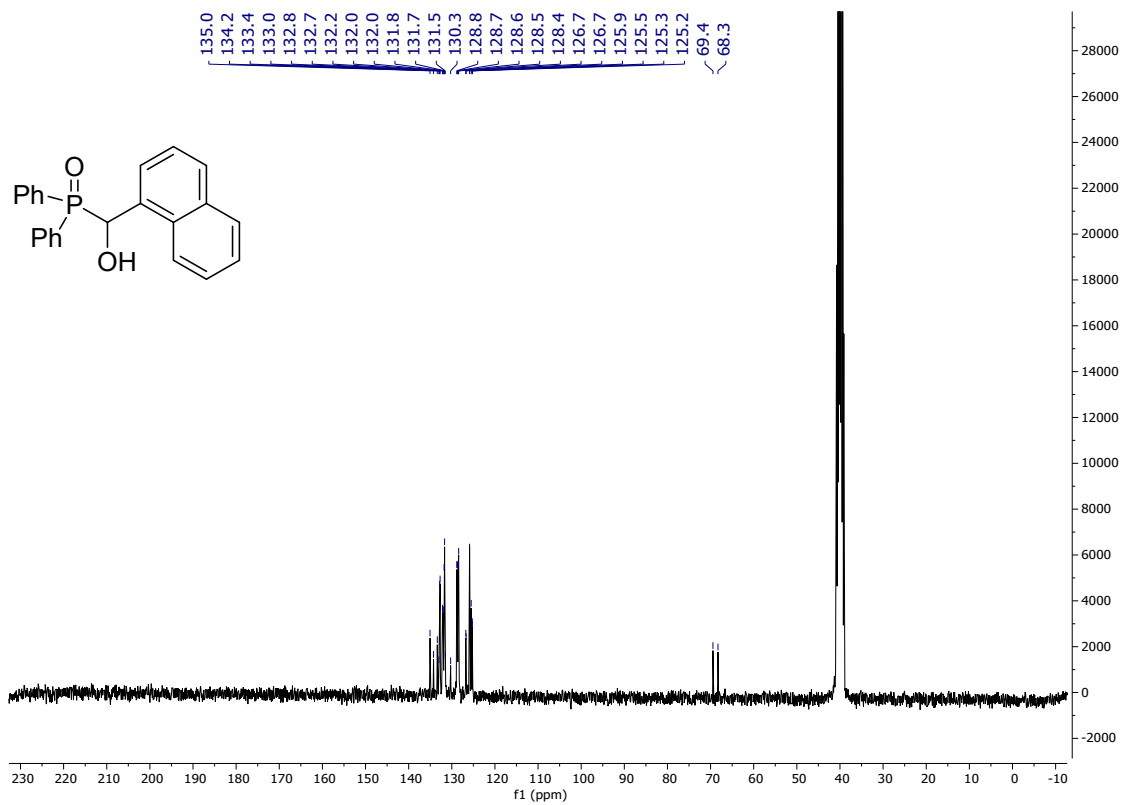

Figure SI\_44:  $^{13}\text{C}$ -NMR for **3n** in  $\text{DMSO-}d^6$  (75 MHz).

**(Cyclohexyl(hydroxy)methyl)diphenylphosphine oxide 3o**

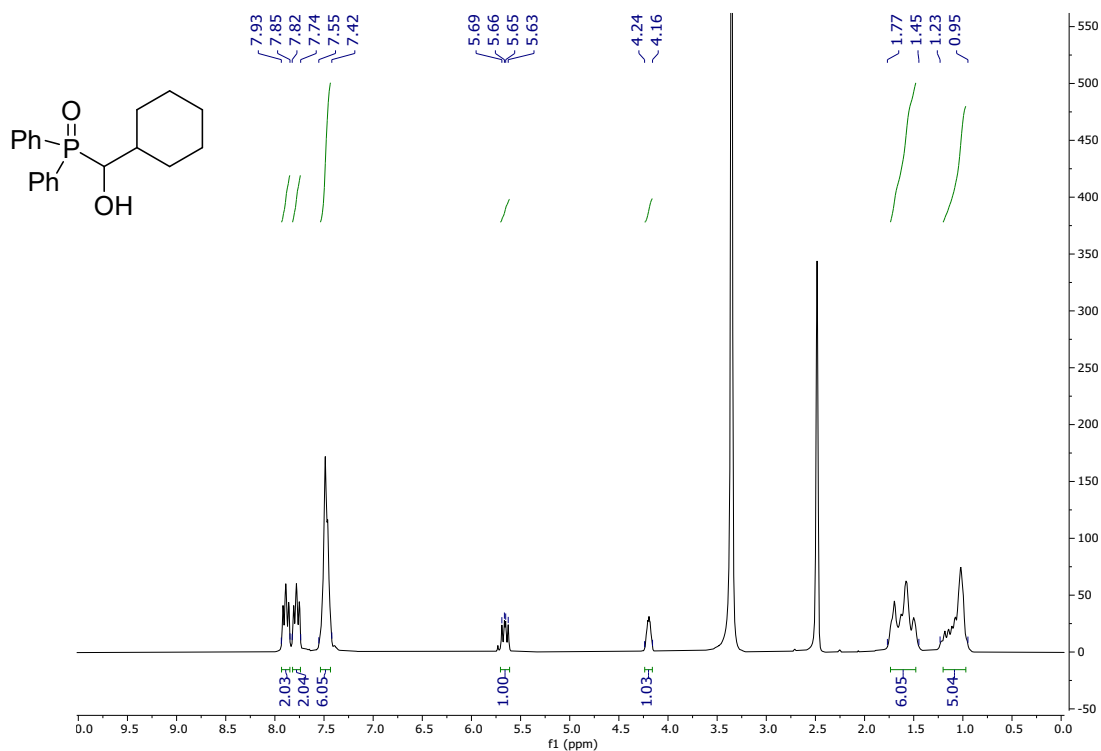

**Figure SI\_45:**  $^1\text{H-NMR}$  for **3o** in  $\text{DMSO-}d^6$  (300 MHz).

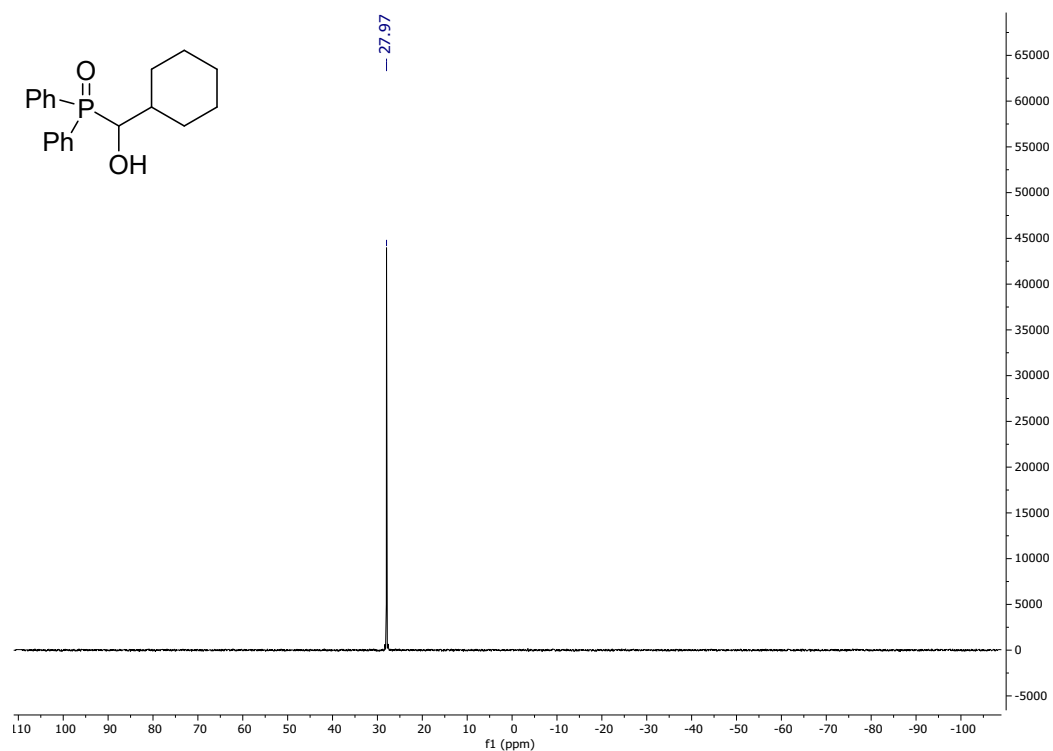

**Figure SI\_46:**  $^{31}\text{P-NMR}$  for **3o** in  $\text{DMSO-}d^6$  (121 MHz).

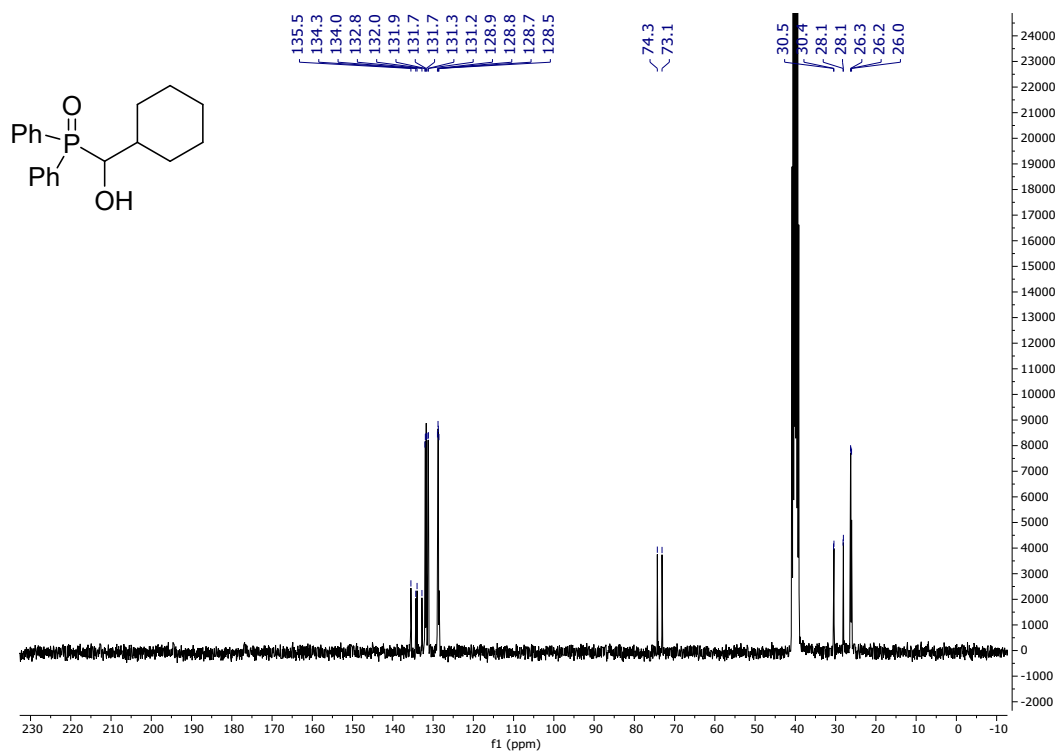

Figure SI\_47:  $^{13}\text{C-NMR}$  for **3o** in  $\text{DMSO-}d^6$  (75 MHz).

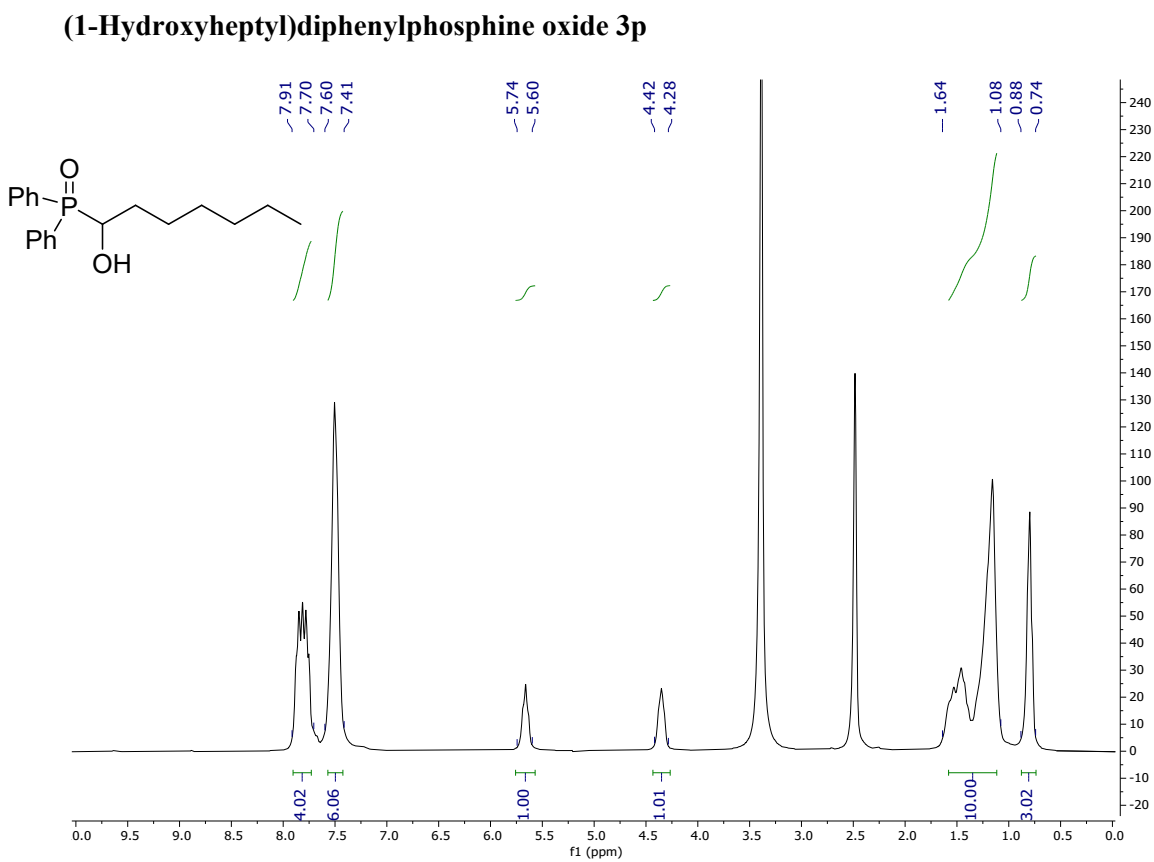

Figure SI\_48:  $^1\text{H-NMR}$  for **3p** in  $\text{DMSO-}d^6$  (300 MHz).

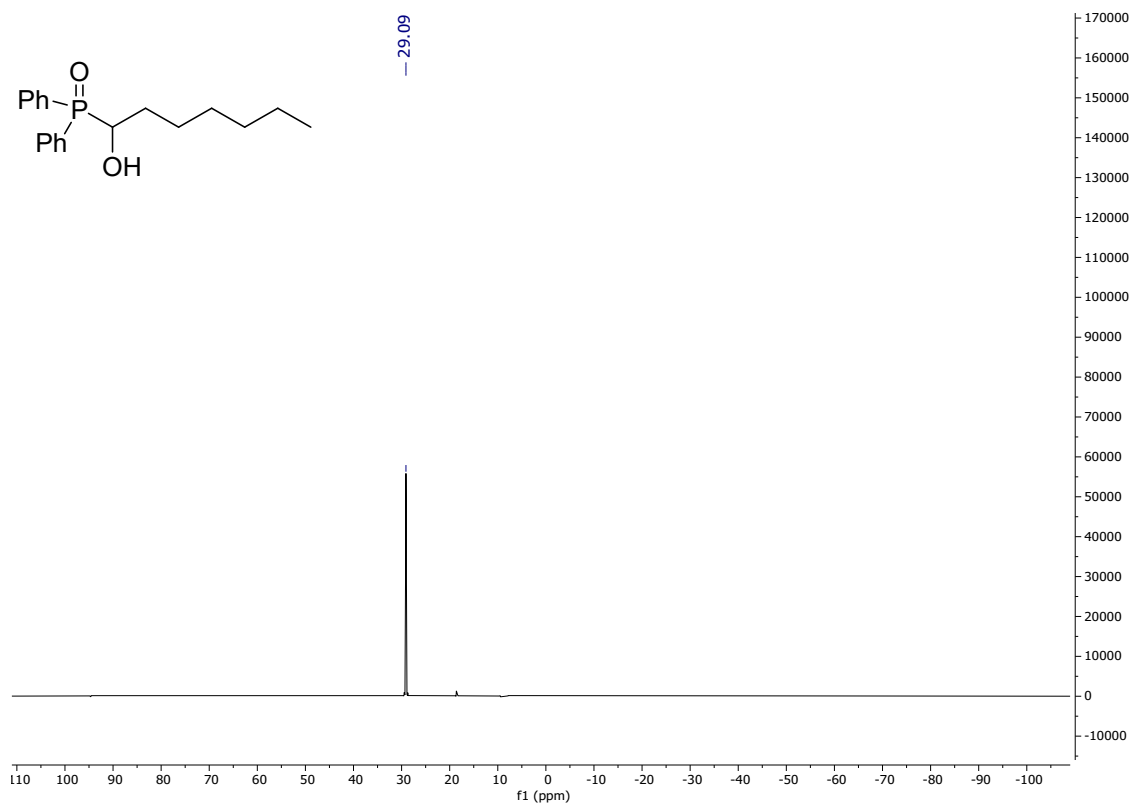

Figure SI\_49:  $^{31}\text{P}$ -NMR for 3p in  $\text{DMSO-}d^6$  (121 MHz).

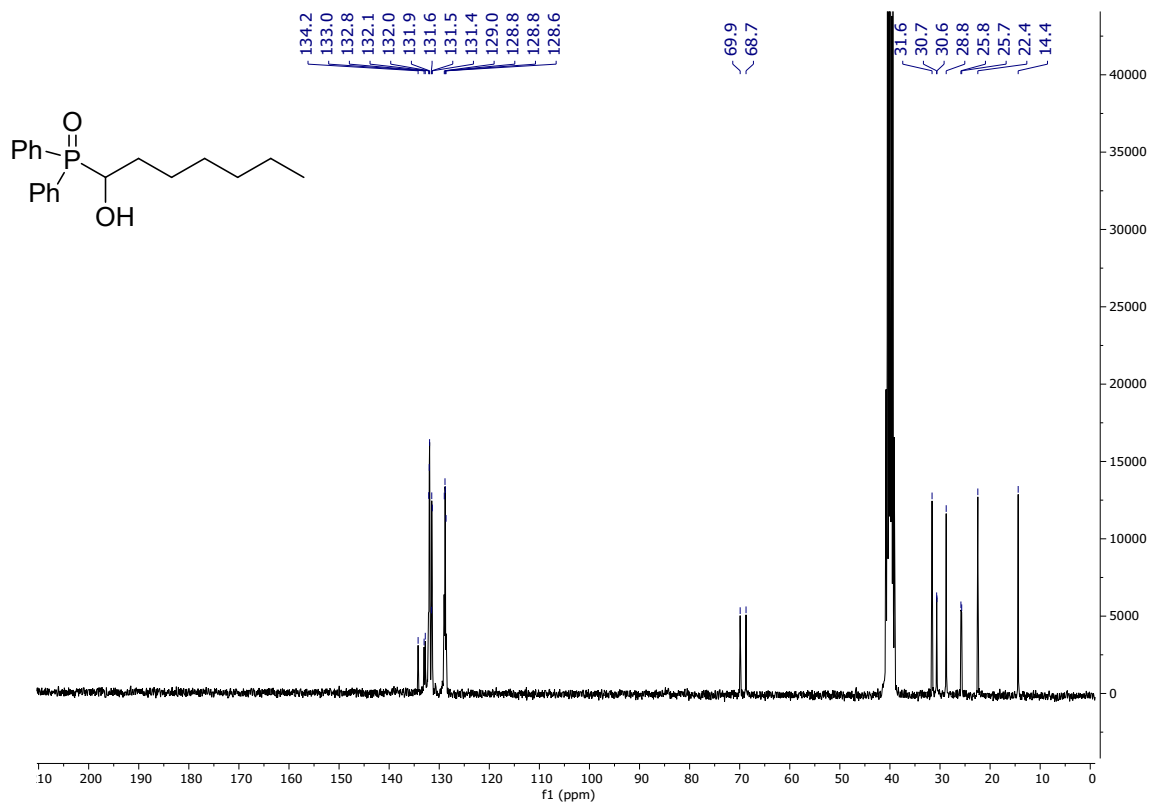

Figure SI\_50:  $^{13}\text{C}$ -NMR for 3p in  $\text{DMSO-}d^6$  (75 MHz).

**((4-Chlorophenyl)(hydroxy)methyl)bis(4-methoxyphenyl)phosphine oxide 3q**

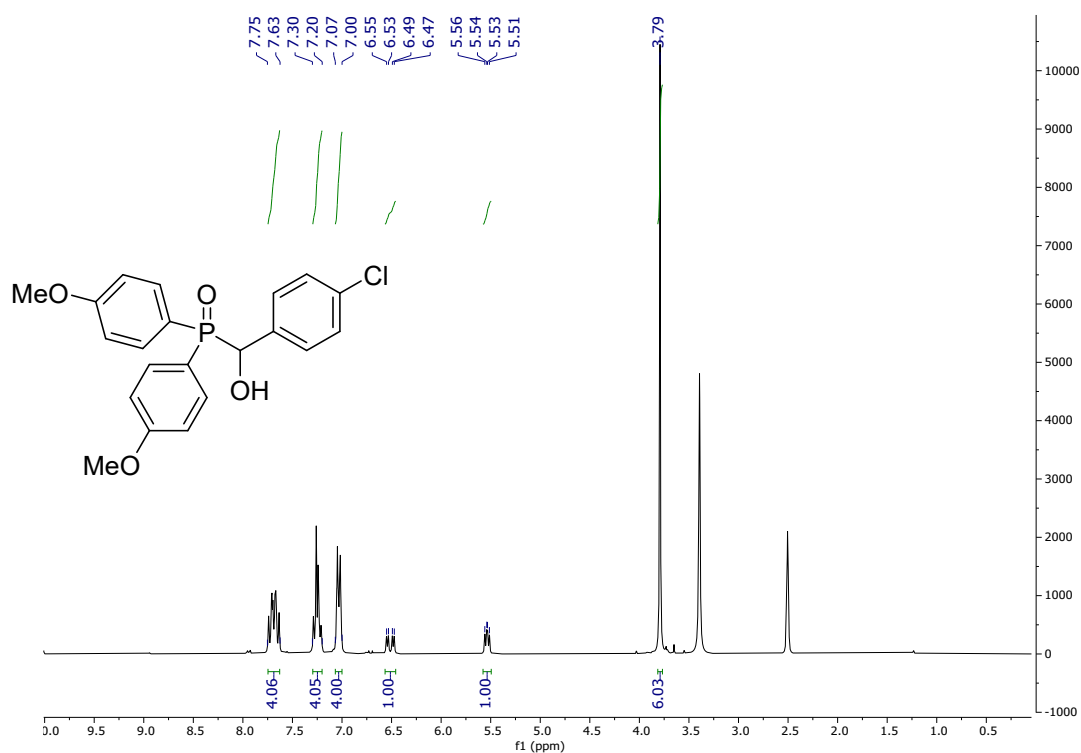

**Figure SI\_51:** <sup>1</sup>H-NMR for **3q** in DMSO-*d*<sup>6</sup> (300 MHz).

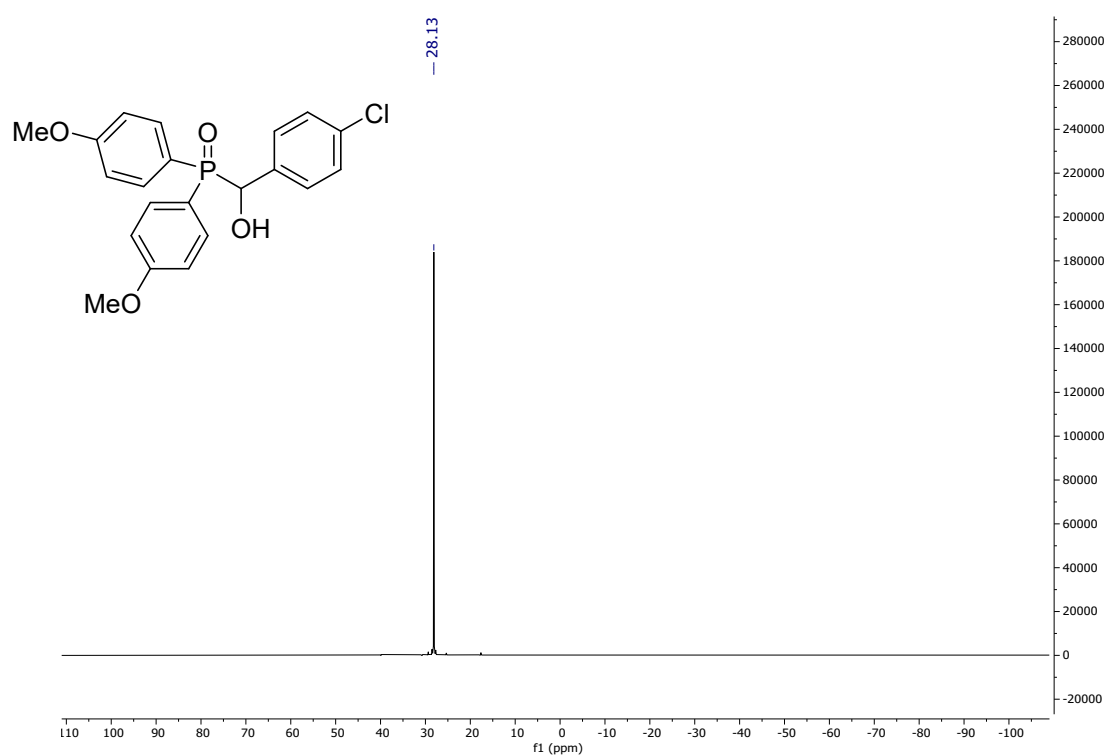

**Figure SI\_52:** <sup>31</sup>P-NMR for **3q** in DMSO-*d*<sup>6</sup> (121 MHz).

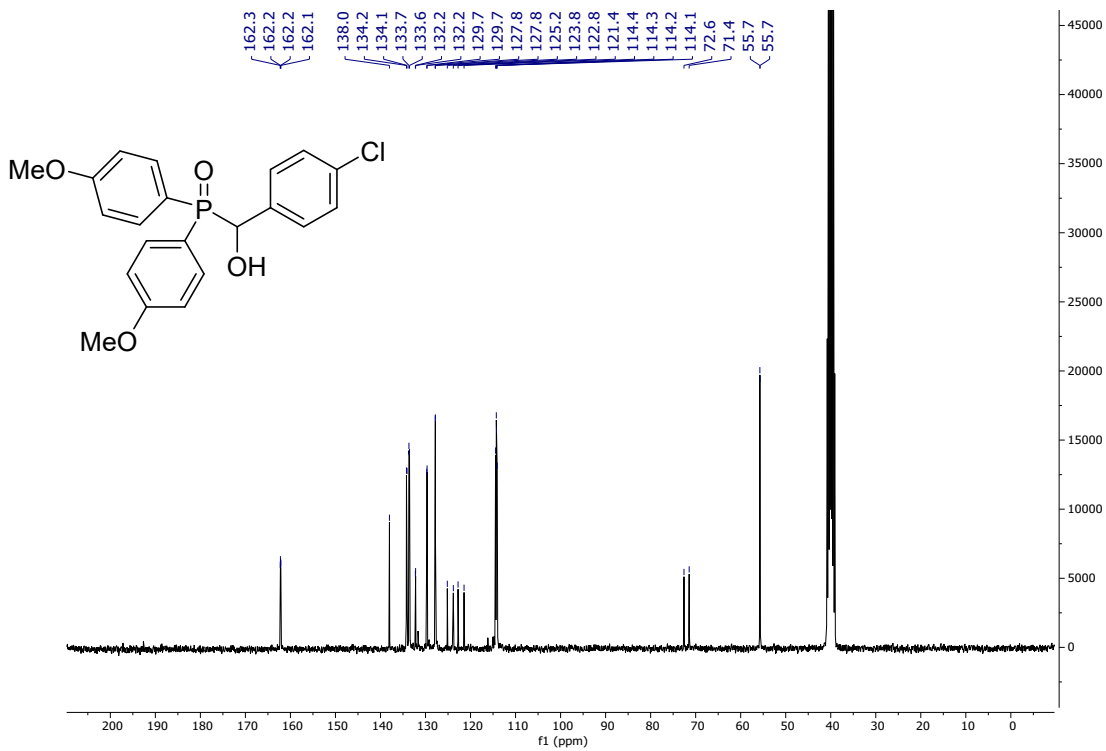

Figure SI\_53: <sup>13</sup>C-NMR for **3q** in DMSO-*d*<sup>6</sup> (75 MHz).

(Hydroxy(phenyl)methyl)bis(4-methoxyphenyl)phosphine oxide **3r**

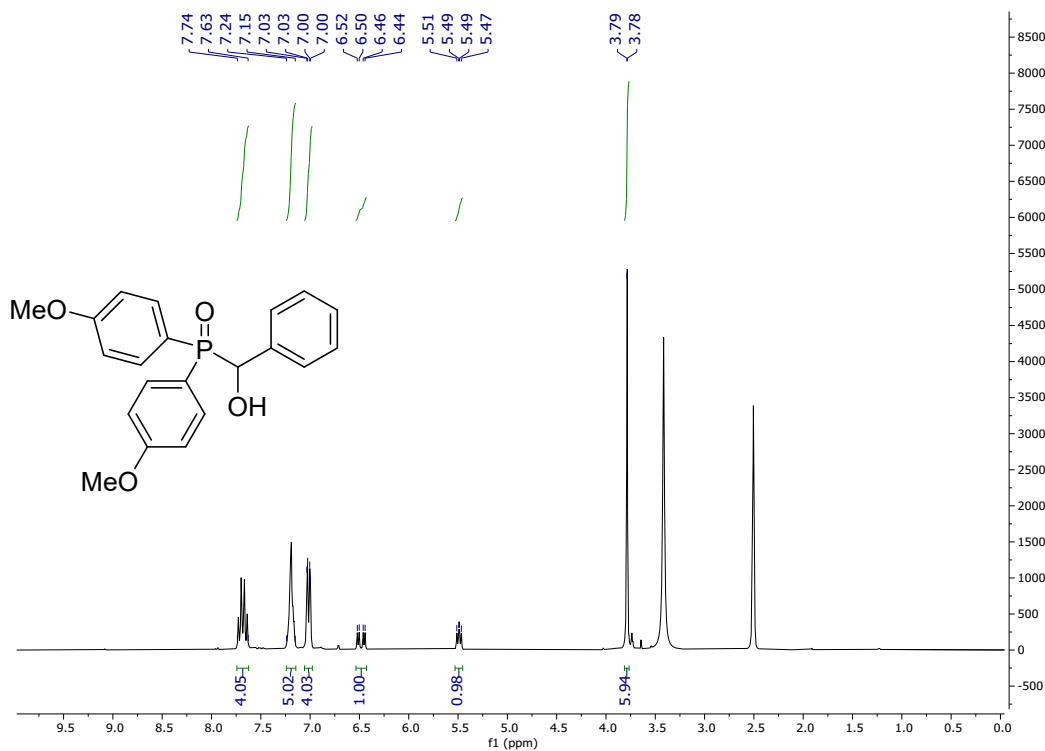

Figure SI\_54: <sup>1</sup>H-NMR for **3r** in DMSO-*d*<sup>6</sup> (300 MHz).

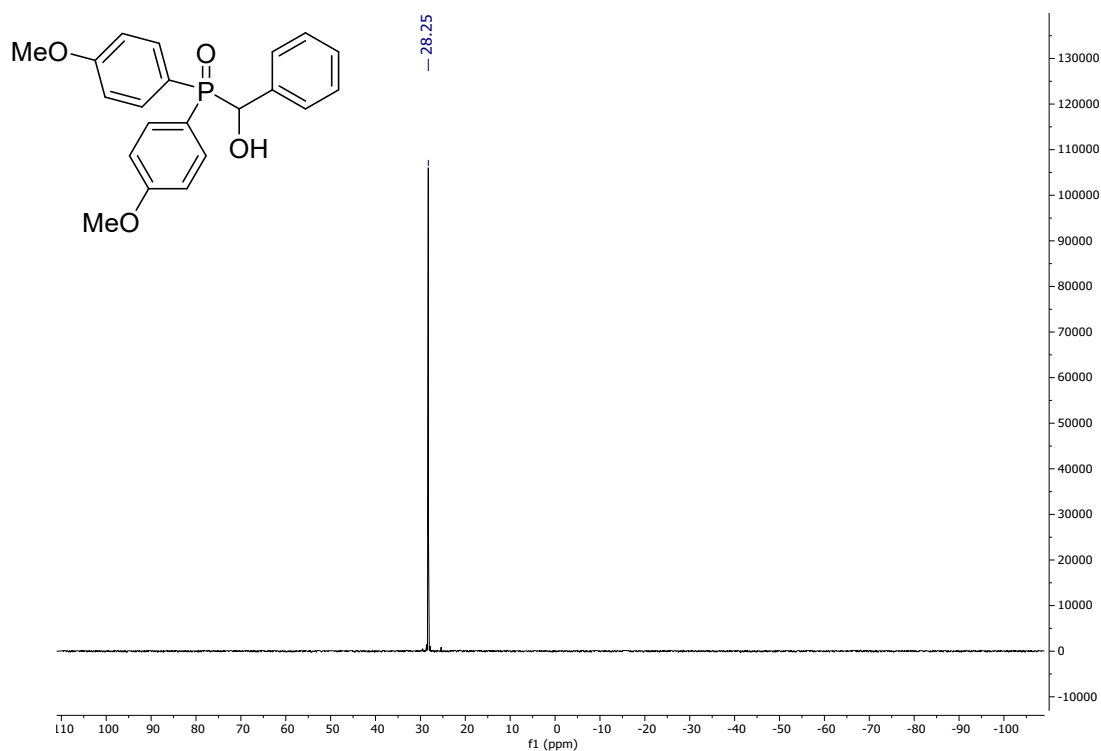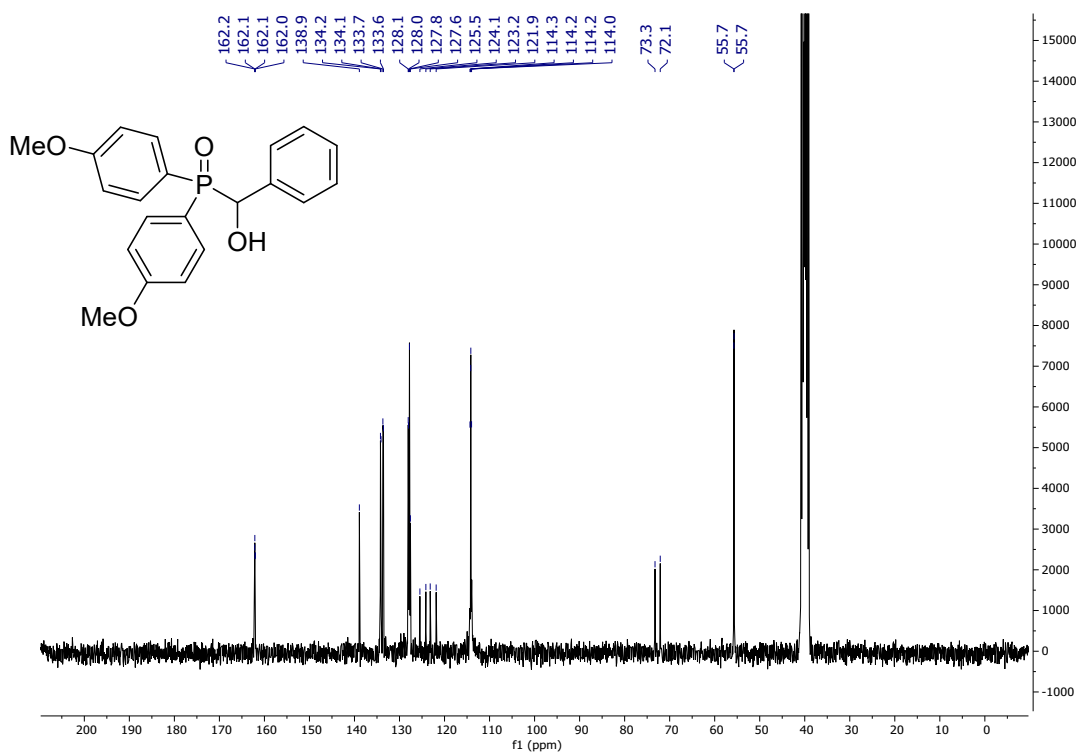

(Hydroxy(4-methoxyphenyl)methyl)bis(4-methoxyphenyl)phosphine oxide 3s

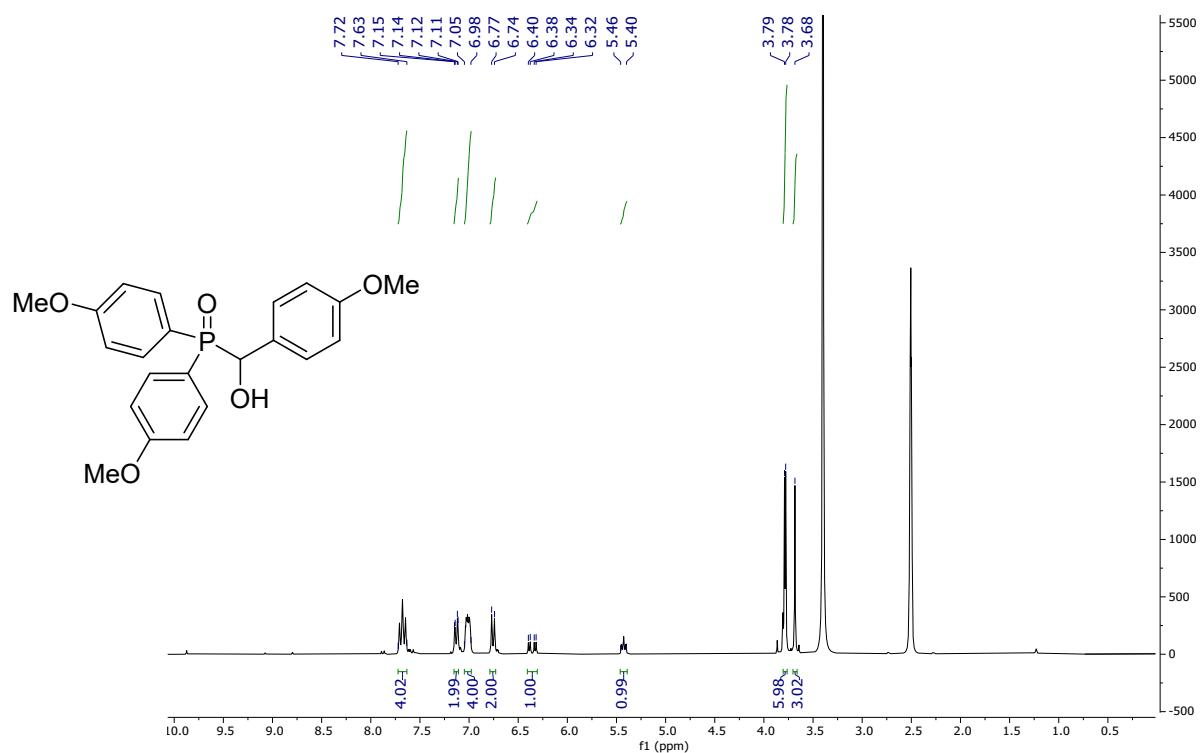

Figure SI\_57:  $^1\text{H-NMR}$  for 3s in  $\text{DMSO-}d^6$  (300 MHz).

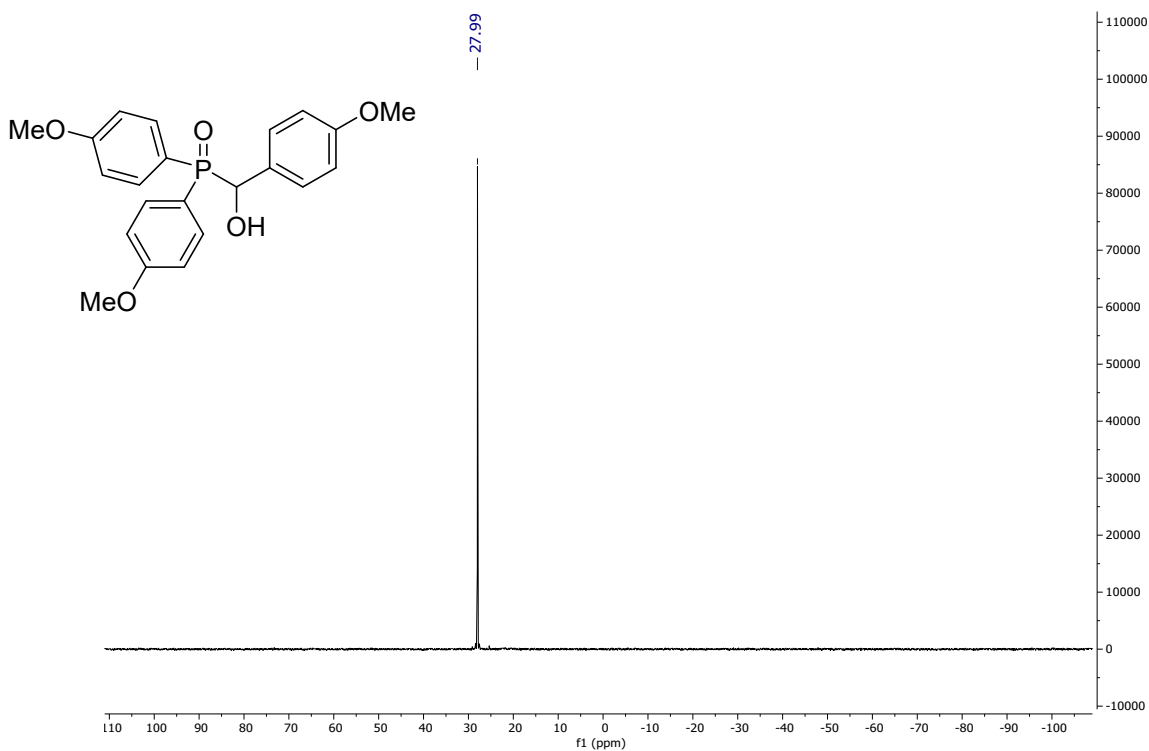

Figure SI\_58:  $^{31}\text{P-NMR}$  for 3s in  $\text{DMSO-}d^6$  (121 MHz).

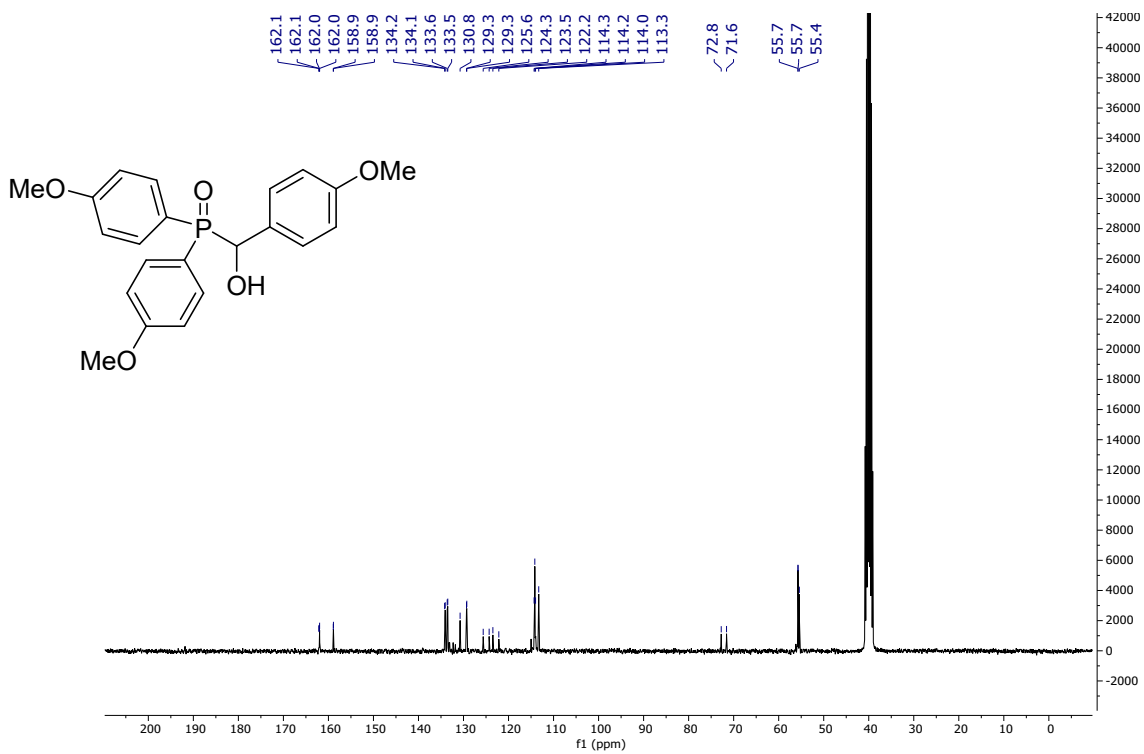

Figure SI\_59: <sup>13</sup>C-NMR for 3s in DMSO-*d*<sup>6</sup> (75 MHz).

Dibutyl((4-chlorophenyl)(hydroxy)methyl)phosphine oxide 3t

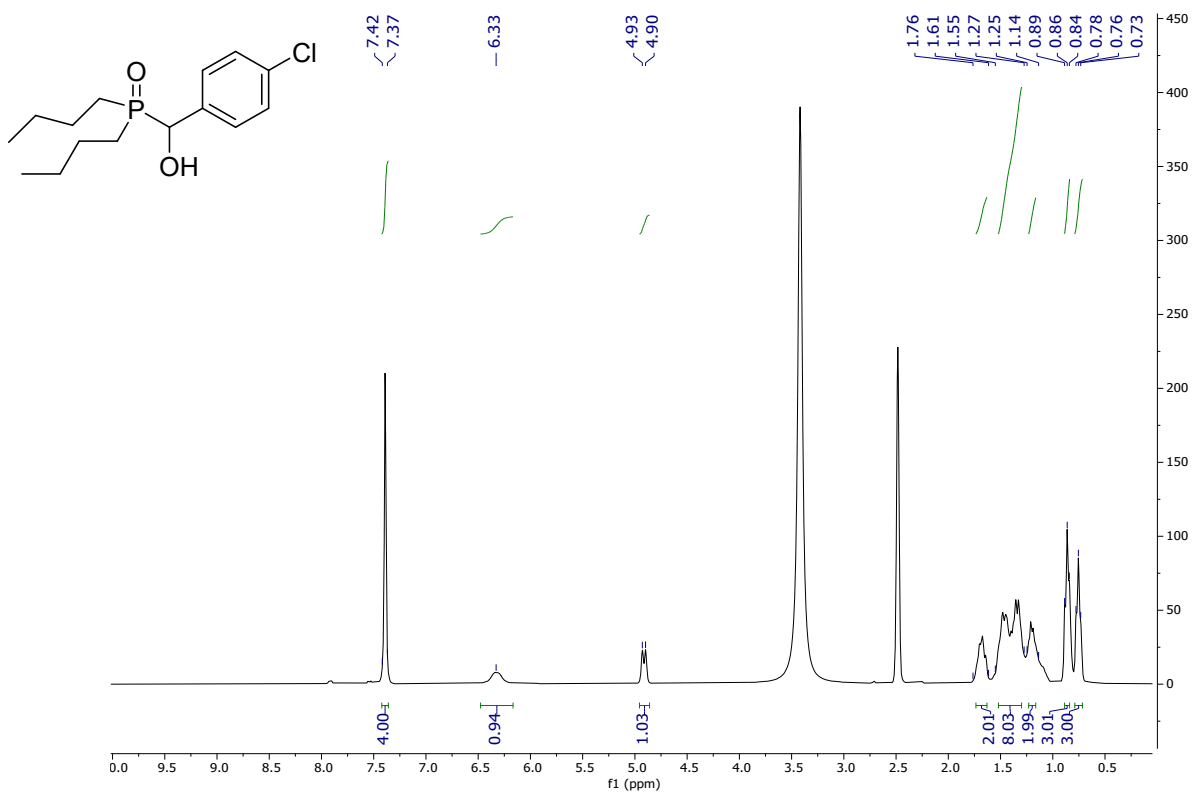

Figure SI\_60: <sup>1</sup>H-NMR for 3t in DMSO-*d*<sup>6</sup> (300 MHz).

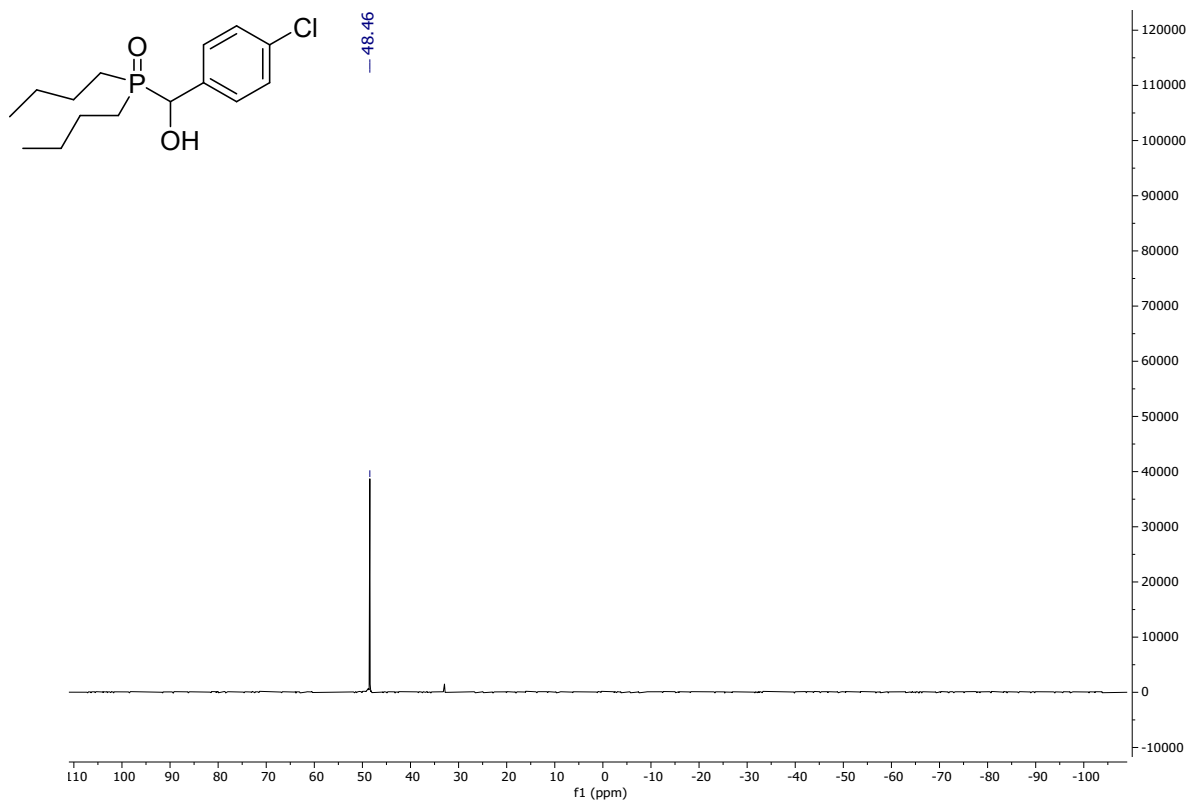

Figure SI\_61:  $^{31}\text{P}$ -NMR for 3t in  $\text{DMSO-}d^6$  (121 MHz).

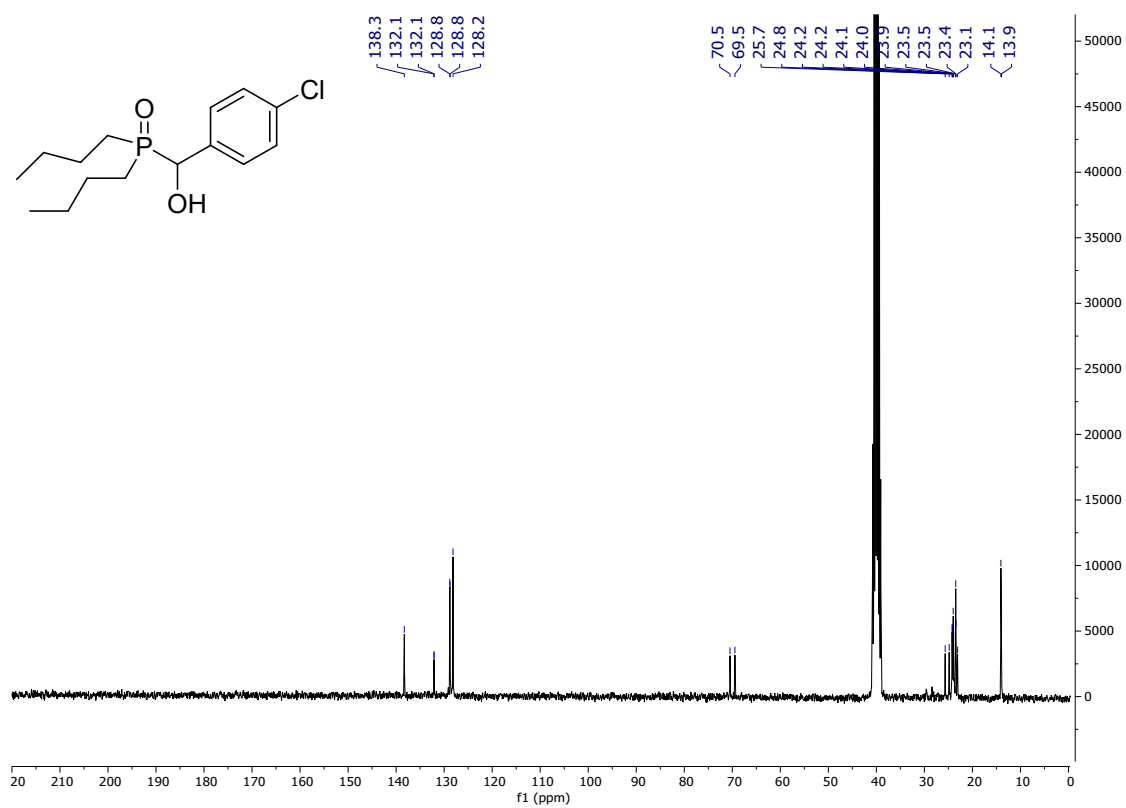

Figure SI\_62:  $^{13}\text{C}$ -NMR for 3t in  $\text{DMSO-}d^6$  (75 MHz).

**((4-Chlorophenyl)(hydroxy)methyl)diphenylphosphine sulfide 3u**

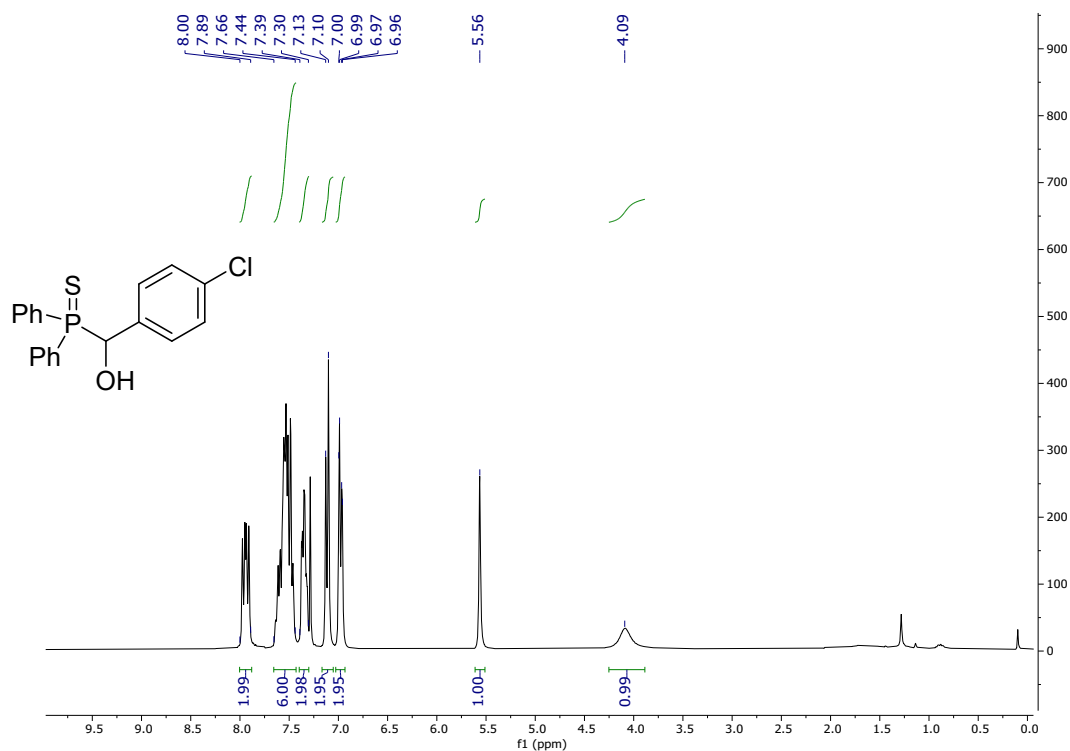

**Figure SI\_63:**  $^1\text{H-NMR}$  for 3u in  $\text{CDCl}_3$  (300 MHz).

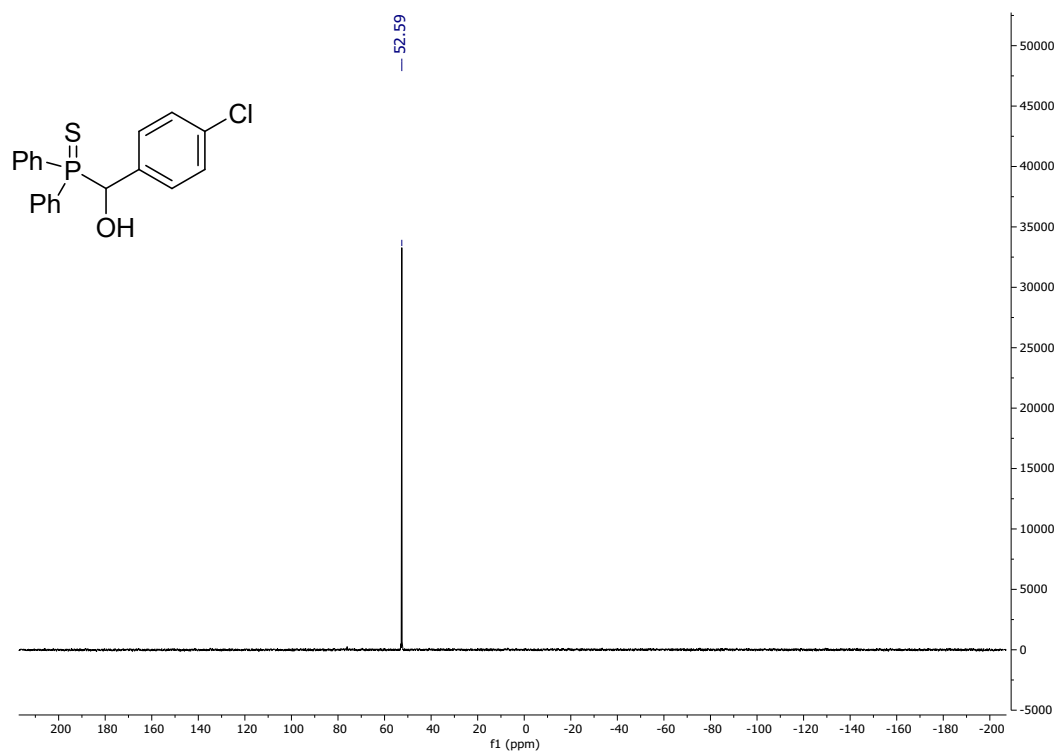

**Figure SI\_64:**  $^{31}\text{P-NMR}$  for 3u in  $\text{CDCl}_3$  (121 MHz).

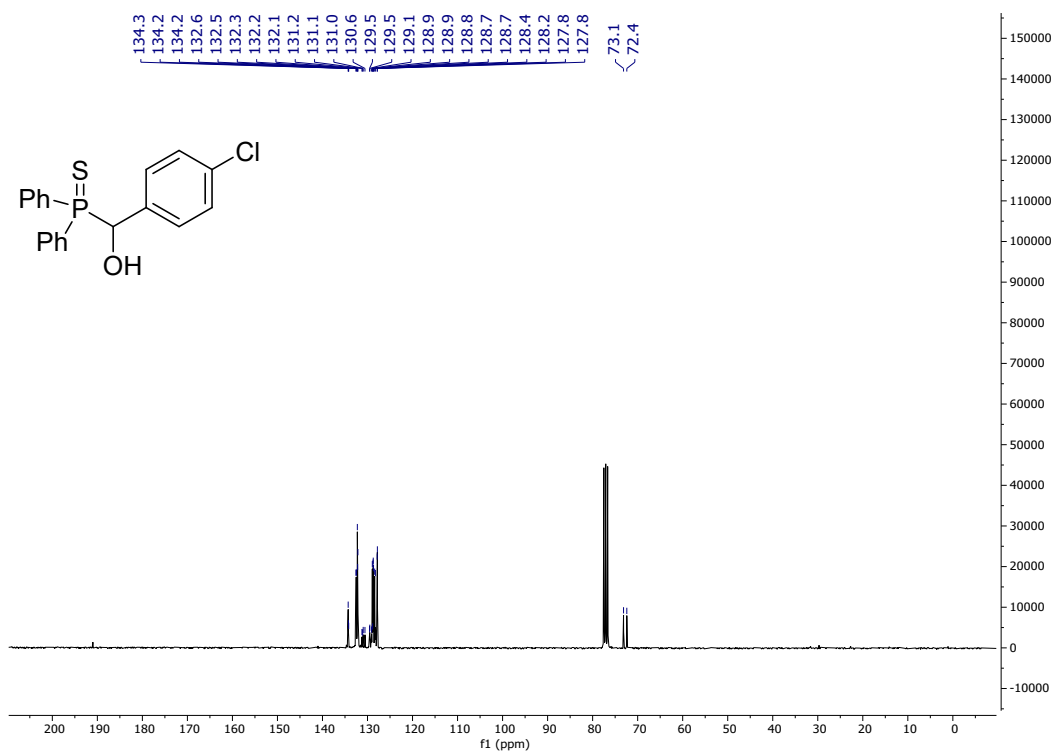

Figure SI\_65: <sup>13</sup>C-NMR for 3u in CDCl<sub>3</sub> (75 MHz).

(Hydroxy(3-nitrophenyl)methyl)diphenylphosphine sulfide 3v

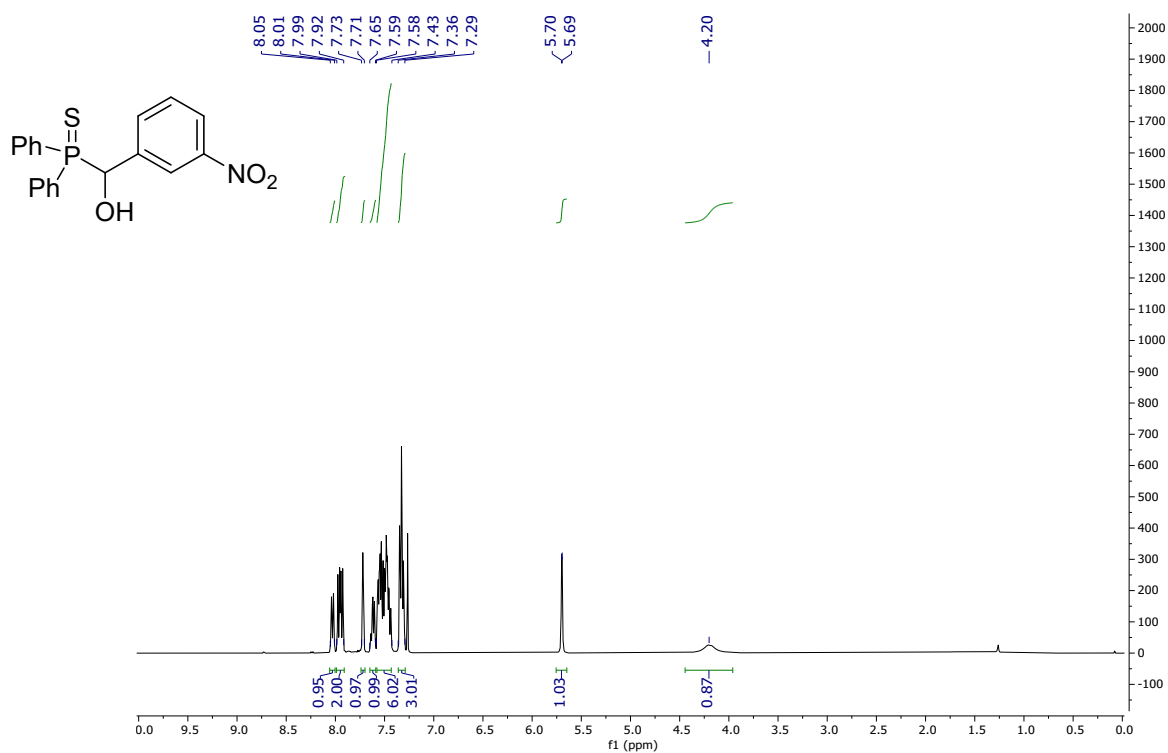

Figure SI\_66: <sup>1</sup>H-NMR for 3v in CDCl<sub>3</sub> (401 MHz).

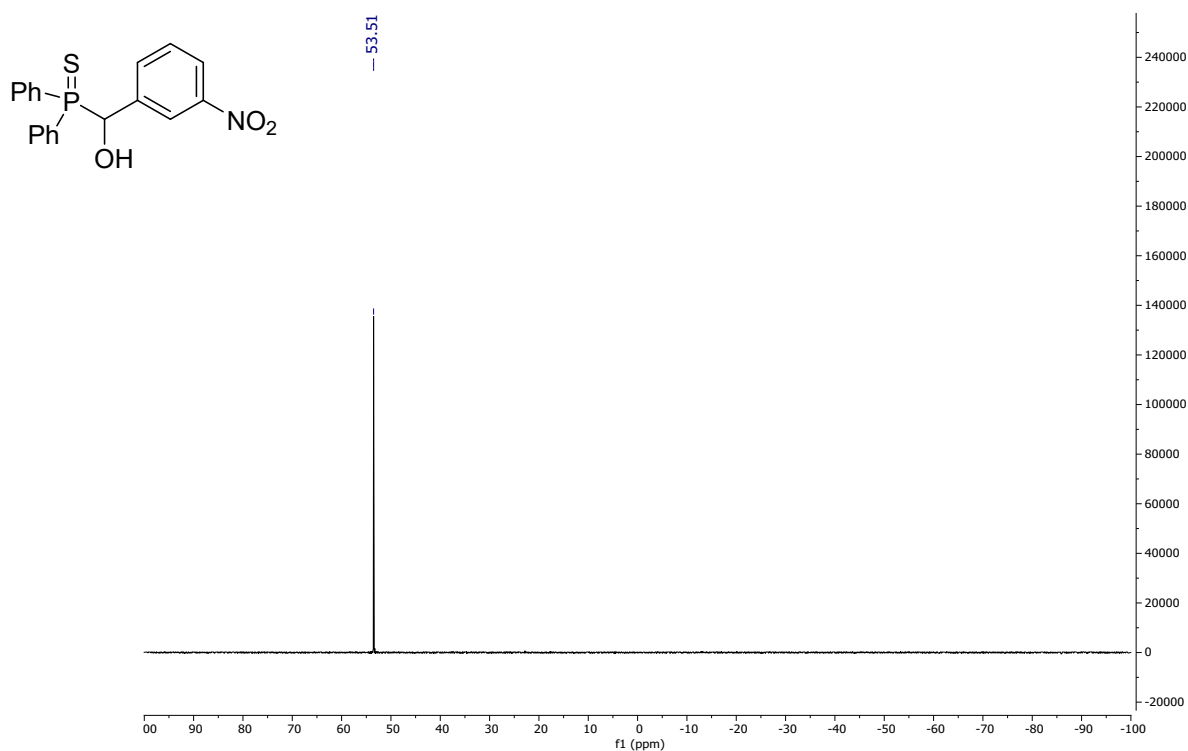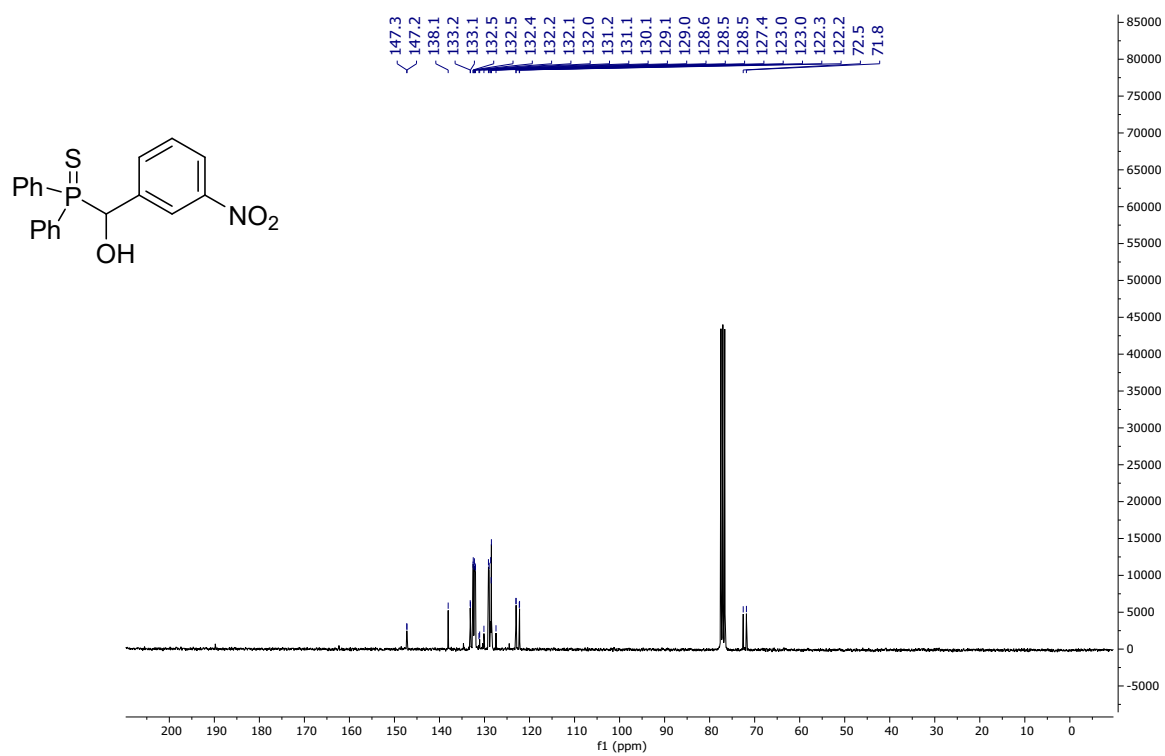

**(E)-(1-Hydroxy-3-(2-nitrophenyl)allyl)diphenylphosphine sulfide 3w**

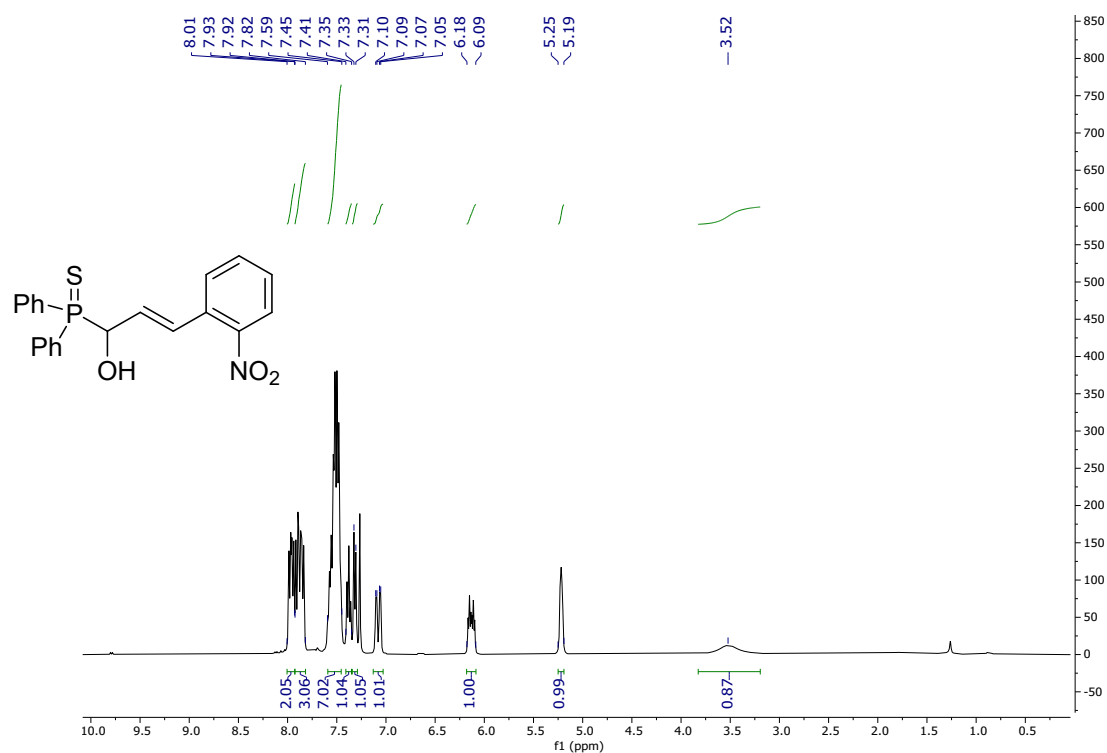

**Figure SI\_69:** <sup>1</sup>H-NMR for 3w in CDCl<sub>3</sub> (401 MHz).

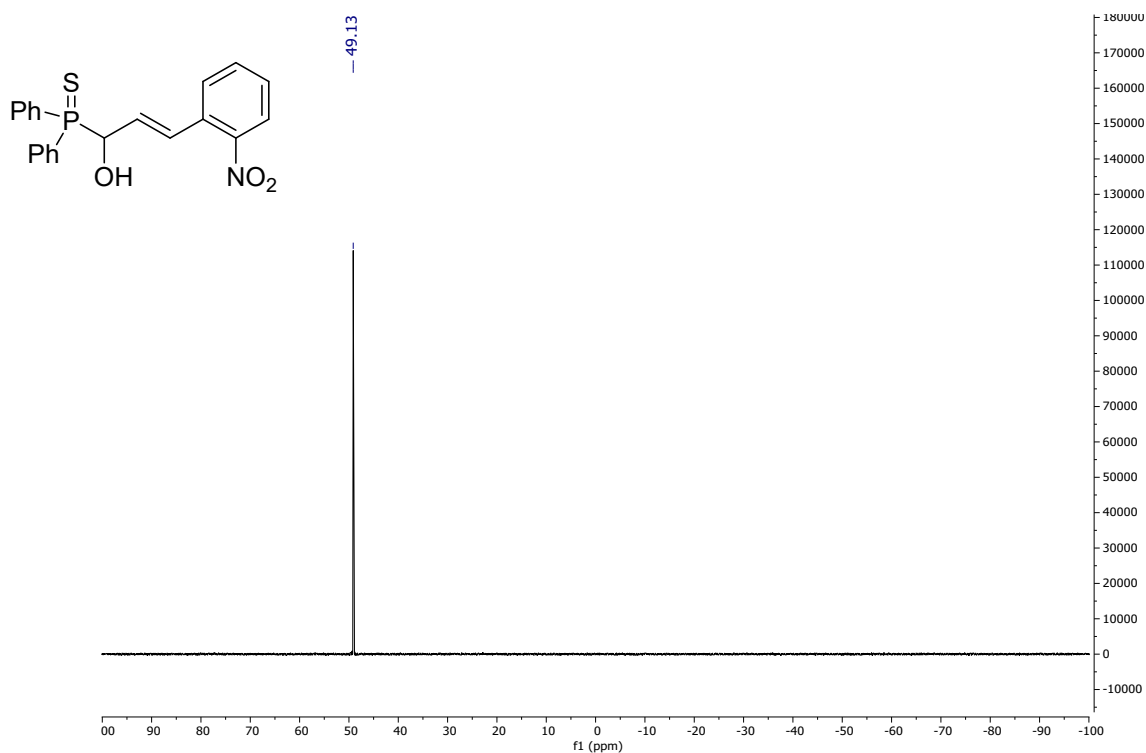

**Figure SI\_70:** <sup>31</sup>P-NMR for 3w in CDCl<sub>3</sub> (162 MHz).

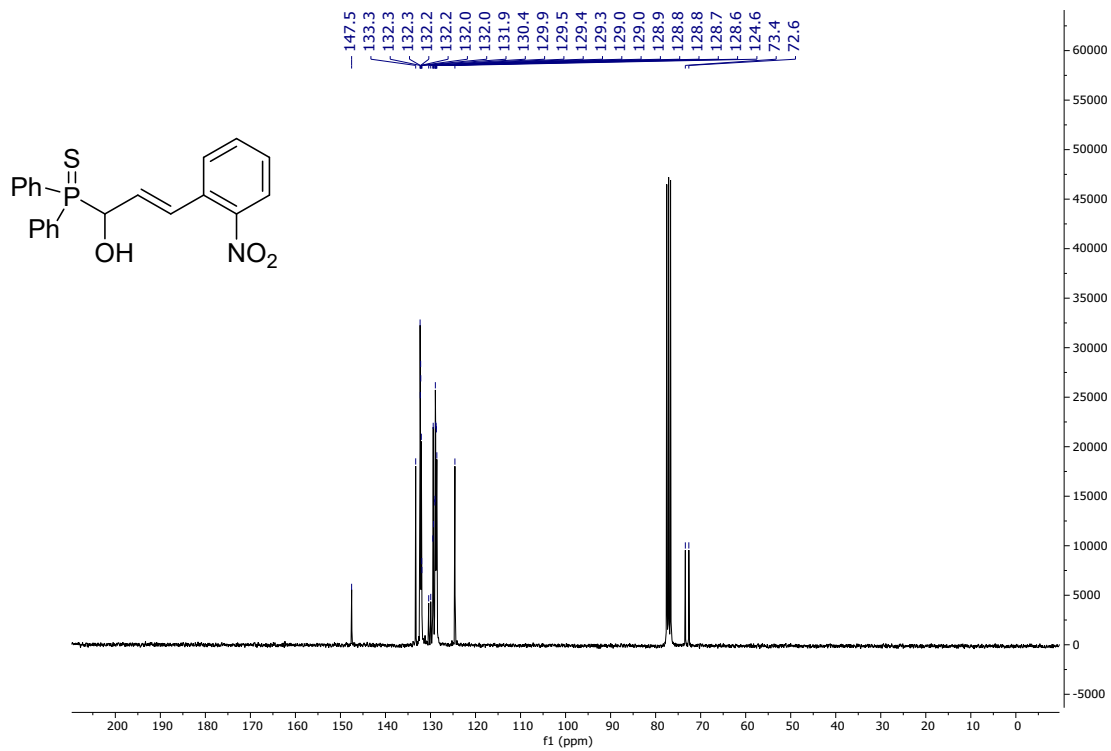

Figure SI\_71: <sup>13</sup>C-NMR for **3w** in CDCl<sub>3</sub> (75 MHz).

**((4-Chlorophenyl)(hydroxy)methyl)diphenylphosphine selenide 3x**

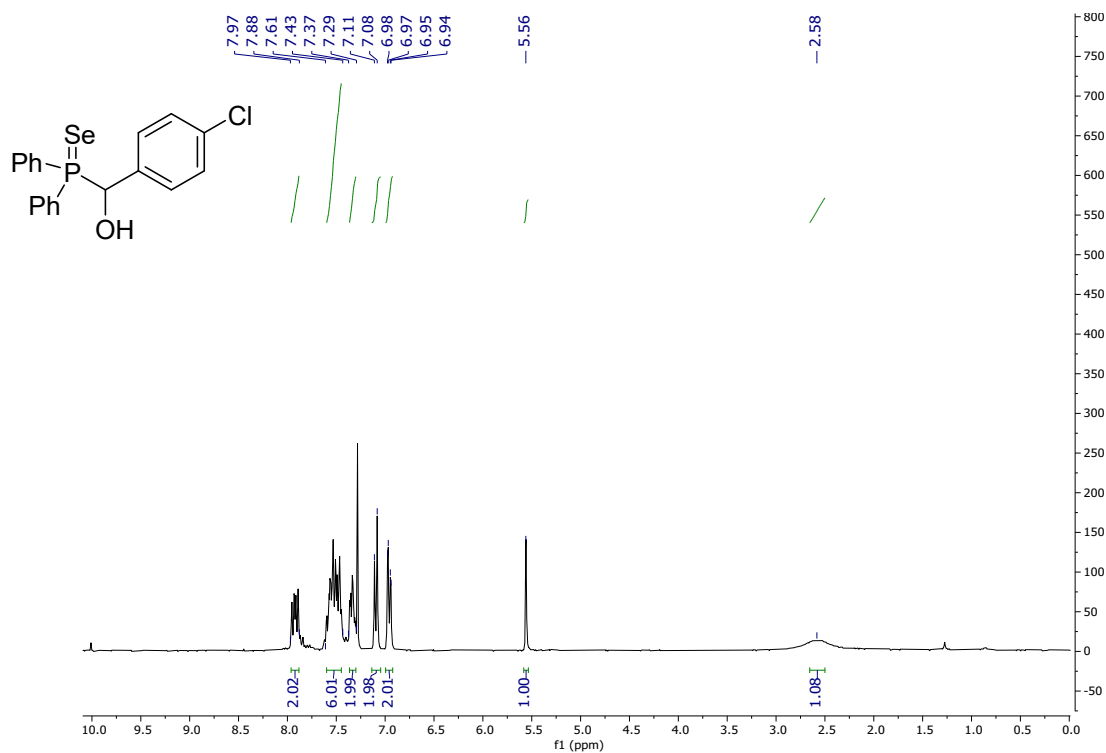

Figure SI\_72: <sup>1</sup>H-NMR for **3x** in CDCl<sub>3</sub> (300 MHz).

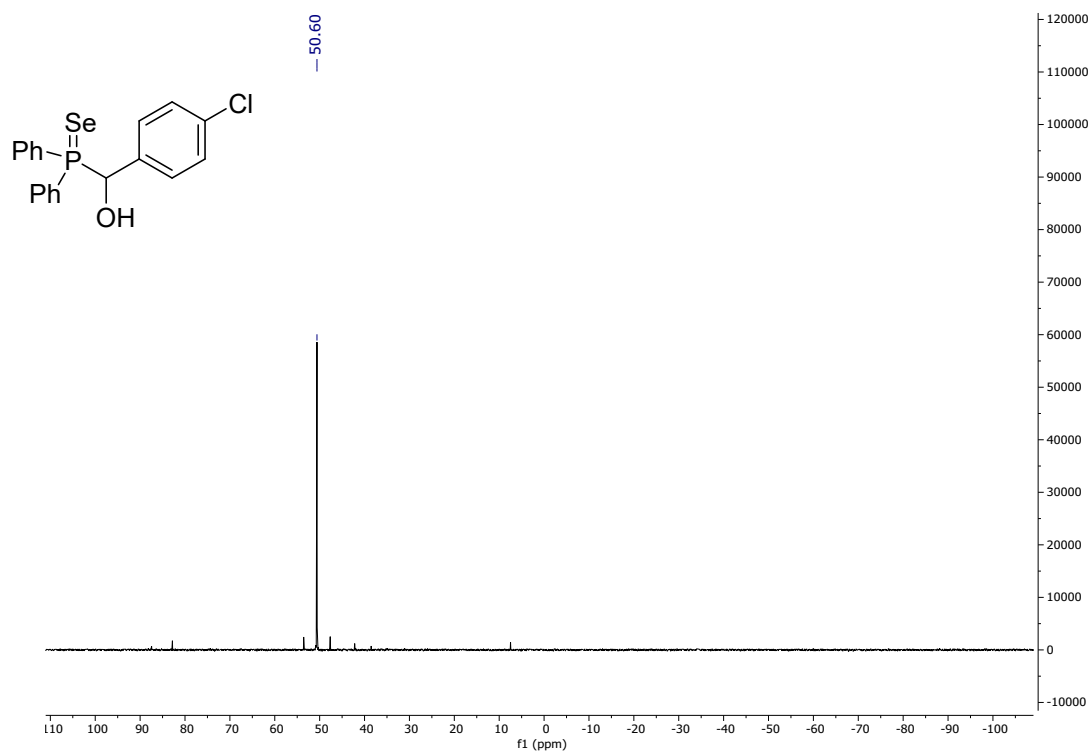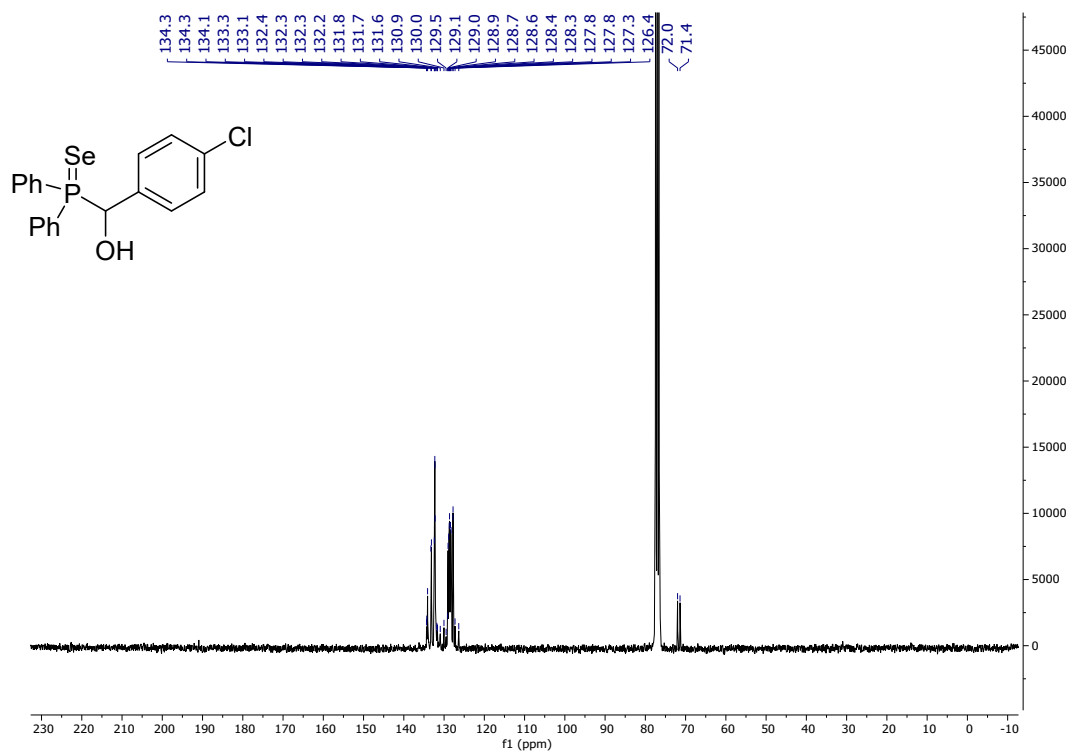

(Hydroxy(3-nitrophenyl)methyl)diphenylphosphine selenide **3y**

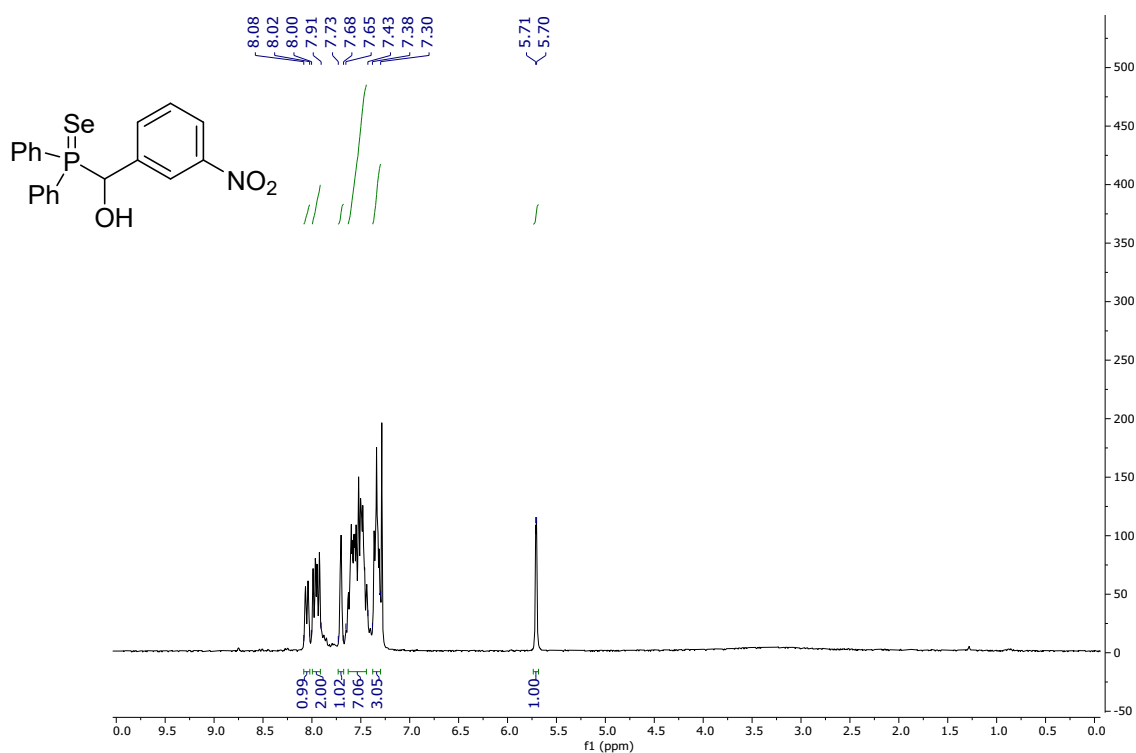

Figure SI\_75:  $^1\text{H-NMR}$  for **3y** in  $\text{CDCl}_3$  (300 MHz).

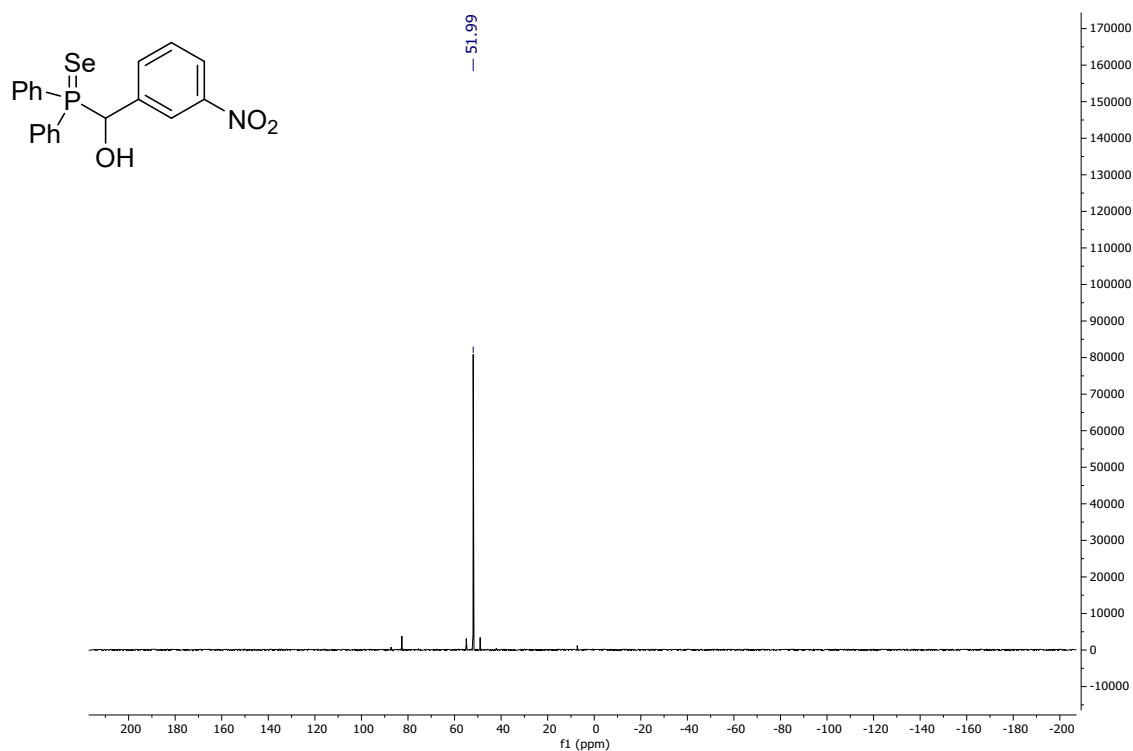

Figure SI\_76:  $^{31}\text{P-NMR}$  for **3y** in  $\text{CDCl}_3$  (121 MHz).

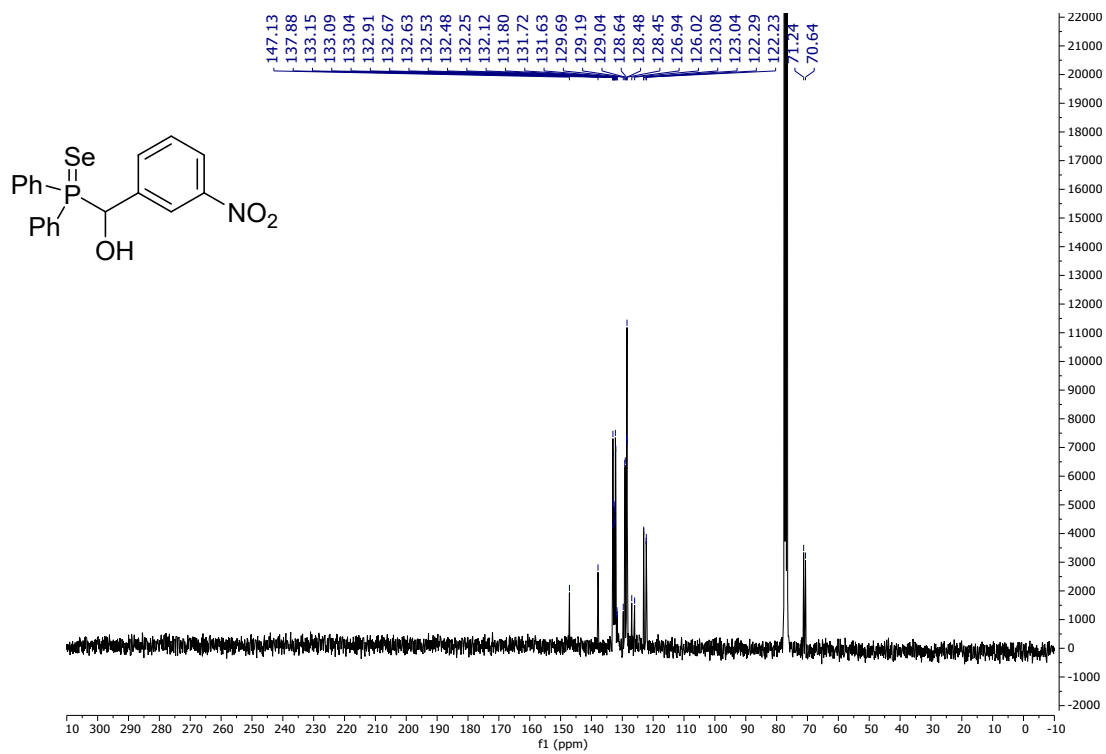

Figure SI\_77:  $^{13}\text{C-NMR}$  for **3y** in  $\text{CDCl}_3$  (75 MHz).
